# Supplementary material
Source: publisher figshare collection journal article supplement (https://acs.figshare.com/ndownloader/files/28344436)
Supplement: Supplementary file 1 [file 28344436]

## Sheet: Sheet1
Accession	Description	Coverage	# Unique Peptides	# AAs	MW [kDa]	calc. pI	Found in Sample Group: [S19] F19: Sample	Modifications	Area: F19: Sample	# Peptides Sequest HT
A0A140N6W0	Elongation factor Tu OS=Escherichia coli (strain B / BL21-DE3) OX=469008 GN=tuf PE=1 SV=1	98.731	52	394	43.3	5.45	High	Met-loss+Acetyl [N-Term]	2.41546e+10	52	34.4916
A0A140N8E1	Phosphoglycerate kinase OS=Escherichia coli (strain B / BL21-DE3) OX=469008 GN=pgk PE=3 SV=1	93.2817	41	387	41.1	5.22	High		6.47137e+09	41	32.5914
A0A140N9D9	2,3-bisphosphoglycerate-dependent phosphoglycerate mutase OS=Escherichia coli (strain B / BL21-DE3) OX=469008 GN=gpmA PE=3 SV=1	84.4	32	250	28.5	6.18	High	Met-loss [N-Term]	6.32427e+09	32	32.5583
A0A140N775	Malate dehydrogenase OS=Escherichia coli (strain B / BL21-DE3) OX=469008 GN=mdh PE=3 SV=1	98.7179	30	312	32.3	5.77	High		6.0859e+09	30	32.5028
A0A140N6G0	Enolase OS=Escherichia coli (strain B / BL21-DE3) OX=469008 GN=eno PE=3 SV=1	89.5833	46	432	45.6	5.48	High		5.70674e+09	46	32.41
A0A140N870	Alcohol dehydrogenase GroES domain protein OS=Escherichia coli (strain B / BL21-DE3) OX=469008 GN=ECBD_1566 PE=3 SV=1	92.7746	26	346	37.4	6.38	High	Met-loss [N-Term]	4.94901e+09	26	32.2045
A0A140NBF0	Superoxide dismutase OS=Escherichia coli (strain B / BL21-DE3) OX=469008 GN=ECBD_1987 PE=3 SV=1	97.9275	15	193	21.3	5.95	High	Met-loss [N-Term]; Met-loss+Acetyl [N-Term]	4.86182e+09	15	32.1788
A0A140N783	Glyceraldehyde-3-phosphate dehydrogenase OS=Escherichia coli (strain B / BL21-DE3) OX=469008 GN=ECBD_1865 PE=3 SV=1	96.6767	44	331	35.5	7.11	High	Met-loss [N-Term]	4.74028e+09	45	32.1423
A0A140N821	Fructose-bisphosphate aldolase, class II OS=Escherichia coli (strain B / BL21-DE3) OX=469008 GN=ECBD_0813 PE=3 SV=1	94.429	30	359	39.1	5.86	High	Met-loss [N-Term]	4.56285e+09	30	32.0873
A0A140NC97	Peroxiredoxin OS=Escherichia coli (strain B / BL21-DE3) OX=469008 GN=ECBD_3047 PE=1 SV=1	100	26	187	20.7	5.17	High	Met-loss [N-Term]	3.95876e+09	26	31.8824
A0A140N510	Phosphoenolpyruvate carboxykinase (ATP) OS=Escherichia coli (strain B / BL21-DE3) OX=469008 GN=pckA PE=3 SV=1	90.7407	55	540	59.6	5.71	High		3.46453e+09	55	31.69
A0A140NGF8	Tryptophanase OS=Escherichia coli (strain B / BL21-DE3) OX=469008 GN=tnaA PE=3 SV=1	92.9936	59	471	52.7	6.23	High	Met-loss [N-Term]; Acetyl [N-Term]	3.45575e+09	59	31.6864
A0A140N6E5	D-tagatose-1,6-bisphosphate aldolase subunit GatZ OS=Escherichia coli (strain B / BL21-DE3) OX=469008 GN=gatZ PE=3 SV=1	91.1905	33	420	47	5.78	High		3.27352e+09	33	31.6082
A0A140NEL5	Triosephosphate isomerase OS=Escherichia coli (strain B / BL21-DE3) OX=469008 GN=tpiA PE=3 SV=1	94.902	24	255	27	5.96	High		3.16273e+09	24	31.5585
A0A140N7C7	Elongation factor G OS=Escherichia coli (strain B / BL21-DE3) OX=469008 GN=fusA PE=3 SV=1	85.7955	63	704	77.5	5.38	High		3.07219e+09	63	31.5166
A0A140NDV9	Transaldolase OS=Escherichia coli (strain B / BL21-DE3) OX=469008 GN=tal PE=3 SV=1	86.1199	33	317	35.2	5.21	High	Met-loss [N-Term]	3.06952e+09	35	31.5154
A0A140NAN3	Isocitrate dehydrogenase [NADP] OS=Escherichia coli (strain B / BL21-DE3) OX=469008 GN=ECBD_2463 PE=4 SV=1	73.3173	37	416	45.7	5.4	High		2474000039	37	31.2042
A0A140N8X9	Serine hydroxymethyltransferase OS=Escherichia coli (strain B / BL21-DE3) OX=469008 GN=glyA PE=3 SV=1	91.6067	41	417	45.3	6.48	High		2.31268e+09	41	31.1069
A0A140N4S7	Glutathione S-transferase domain protein OS=Escherichia coli (strain B / BL21-DE3) OX=469008 GN=ECBD_0518 PE=3 SV=1	68.8679	15	212	24.3	5.34	High		2.21822e+09	15	31.0468
A0A140NFD7	Elongation factor Ts OS=Escherichia coli (strain B / BL21-DE3) OX=469008 GN=tsf PE=3 SV=1	91.1661	36	283	30.4	5.29	High	Met-loss [N-Term]	2.20116e+09	36	31.0356
A0A140NE28	Glycoside hydrolase family 4 OS=Escherichia coli (strain B / BL21-DE3) OX=469008 GN=ECBD_3912 PE=3 SV=1	88.4701	50	451	50.6	5.91	High		2.19434e+09	50	31.0311
A0A140ND68	Aminotransferase OS=Escherichia coli (strain B / BL21-DE3) OX=469008 GN=ECBD_2667 PE=3 SV=1	77.5253	35	396	43.5	5.77	High	Met-loss [N-Term]	2.0757e+09	35	30.951
A0A140NEK1	Adenylosuccinate synthetase OS=Escherichia coli (strain B / BL21-DE3) OX=469008 GN=purA PE=3 SV=1	90.2778	45	432	47.3	5.49	High	Met-loss [N-Term]	2.03131e+09	45	30.9198
A0A140NEN6	10 kDa chaperonin OS=Escherichia coli (strain B / BL21-DE3) OX=469008 GN=groS PE=3 SV=1	88.6598	9	97	10.4	5.24	High	Met-loss [N-Term]; Acetyl [N-Term]	1.75466e+09	9	30.7085
A0A140NA92	3-oxoacyl-[acyl-carrier-protein] synthase 2 OS=Escherichia coli (strain B / BL21-DE3) OX=469008 GN=ECBD_2506 PE=3 SV=1	93.9467	27	413	43	6.09	High		1.69745e+09	27	30.6607
A0A140N9G9	Beta-ketoacyl synthase OS=Escherichia coli (strain B / BL21-DE3) OX=469008 GN=ECBD_1336 PE=3 SV=1	80.2956	25	406	42.6	5.54	High		1.63156e+09	25	30.6036
A0A140NEF7	Phosphopentomutase OS=Escherichia coli (strain B / BL21-DE3) OX=469008 GN=deoB PE=3 SV=1	97.0516	39	407	44.3	5.35	High	Met-loss+Acetyl [N-Term]	1.6027e+09	39	30.5779
A0A140N487	2-amino-3-ketobutyrate coenzyme A ligase OS=Escherichia coli (strain B / BL21-DE3) OX=469008 GN=kbl PE=3 SV=1	78.392	28	398	43	6.11	High	Met-loss [N-Term]	1.59629e+09	28	30.5721
A0A140N7M5	Acetate kinase OS=Escherichia coli (strain B / BL21-DE3) OX=469008 GN=ackA PE=3 SV=1	91	27	400	43.3	6.28	High		1.34135e+09	27	30.321
A0A140NCG0	Thiol peroxidase OS=Escherichia coli (strain B / BL21-DE3) OX=469008 GN=tpx PE=3 SV=1	100	13	168	17.8	4.92	High	Met-loss [N-Term]	1.33865e+09	13	30.3181
A0A140NFV3	Chaperone protein DnaK OS=Escherichia coli (strain B / BL21-DE3) OX=469008 GN=dnaK PE=2 SV=1	88.2445	71	638	69.1	4.97	High	Met-loss [N-Term]	1.27229e+09	71	30.2448
A0A140NFP9	Aconitate hydratase B OS=Escherichia coli (strain B / BL21-DE3) OX=469008 GN=ECBD_3501 PE=3 SV=1	84.5087	74	865	93.4	5.4	High		1.20851e+09	74	30.1706
A0A140N802	Glycerophosphoryl diester phosphodiesterase OS=Escherichia coli (strain B / BL21-DE3) OX=469008 GN=ECBD_1421 PE=4 SV=1	83.2402	30	358	40.8	5.6	High		1.20768e+09	30	30.1696
A0A140NFF3	Phosphoheptose isomerase OS=Escherichia coli (strain B / BL21-DE3) OX=469008 GN=gmhA PE=3 SV=1	90.1042	17	192	20.8	6.42	High	Met-loss [N-Term]	1.14249e+09	17	30.0895
A0A140NDW9	2,3,4,5-tetrahydropyridine-2,6-dicarboxylate N-succinyltransferase OS=Escherichia coli (strain B / BL21-DE3) OX=469008 GN=dapD PE=3 SV=1	85.4015	24	274	29.9	5.74	High		1.11642e+09	24	30.0562
A0A140SS73	Glycerol kinase OS=Escherichia coli (strain B / BL21-DE3) OX=469008 GN=glpK PE=3 SV=1	92.0319	45	502	56.2	5.5	High		1.02453e+09	45	29.9323
A0A140NB56	Glucose-1-phosphatase OS=Escherichia coli (strain B / BL21-DE3) OX=469008 GN=ECBD_2592 PE=4 SV=1	82.5666	28	413	45.7	5.9	High		9.95567e+08	28	29.8909
A0A140NBS2	Endoribonuclease L-PSP OS=Escherichia coli (strain B / BL21-DE3) OX=469008 GN=ECBD_3790 PE=4 SV=1	94.5312	12	128	13.6	5.5	High	Met-loss [N-Term]	9.36016e+08	14	29.802
A0A140NEJ3	6,7-dihydropteridine reductase OS=Escherichia coli (strain B / BL21-DE3) OX=469008 GN=ECBD_3084 PE=4 SV=1	73.2719	22	217	23.9	6.06	High	Met-loss [N-Term]	935602710	22	29.8013
A0A140N3U1	tRNA-modifying protein YgfZ OS=Escherichia coli (strain B / BL21-DE3) OX=469008 GN=ygfZ PE=3 SV=1	81.5951	34	326	36.1	5.27	High	Met-loss [N-Term]	9.08069e+08	34	29.7582
A0A140SS95	5-methyltetrahydropteroyltriglutamate--homocysteine methyltransferase OS=Escherichia coli (strain B / BL21-DE3) OX=469008 GN=metE PE=3 SV=1	75.5644	48	753	84.7	5.92	High	Met-loss [N-Term]	8.69419e+08	48	29.6955
A0A140NA83	Enoyl-[acyl-carrier-protein] reductase [NADH] OS=Escherichia coli (strain B / BL21-DE3) OX=469008 GN=ECBD_2329 PE=1 SV=1	95.4198	21	262	27.8	5.87	High		8.47072e+08	21	29.6579
A0A140NGD0	Alpha,alpha-phosphotrehalase OS=Escherichia coli (strain B / BL21-DE3) OX=469008 GN=ECBD_3794 PE=4 SV=1	71.8693	33	551	63.8	5.87	High	Met-loss [N-Term]; Met-loss+Acetyl [N-Term]	8.44812e+08	33	29.6541
A0A140N8G3	Aminomethyltransferase OS=Escherichia coli (strain B / BL21-DE3) OX=469008 GN=gcvT PE=3 SV=1	74.7253	21	364	40.1	5.57	High	Met-loss [N-Term]	8.35887e+08	21	29.6387
A0A140NET2	Trigger factor OS=Escherichia coli (strain B / BL21-DE3) OX=469008 GN=tig PE=3 SV=1	81.0185	58	432	48.2	4.88	High	Met-loss [N-Term]	8.18554e+08	58	29.6085
A0A140NE11	Nitroreductase OS=Escherichia coli (strain B / BL21-DE3) OX=469008 GN=ECBD_2743 PE=4 SV=1	70.8333	18	240	26.8	6.93	High		8.17287e+08	18	29.6063
A0A140NDA6	Thioredoxin reductase OS=Escherichia coli (strain B / BL21-DE3) OX=469008 GN=ECBD_2707 PE=3 SV=1	79.4393	19	321	34.6	5.5	High		8.07424e+08	19	29.5888
A0A140NDB1	Aminoacyl-histidine dipeptidase OS=Escherichia coli (strain B / BL21-DE3) OX=469008 GN=ECBD_3384 PE=4 SV=1	71.9588	33	485	52.9	5.52	High	Met-loss [N-Term]	7.55485e+08	33	29.4928
A0A140NAH1	DsrE family protein OS=Escherichia coli (strain B / BL21-DE3) OX=469008 GN=ECBD_2400 PE=4 SV=1	86.3248	6	117	12.7	5.11	High		7.52653e+08	6	29.4874
A0A140NDH1	Glutamate-1-semialdehyde 2,1-aminomutase OS=Escherichia coli (strain B / BL21-DE3) OX=469008 GN=hemL PE=3 SV=1	64.0845	19	426	45.3	4.86	High	Met-loss [N-Term]	7.4554e+08	19	29.4737
A0A140NGG2	Peptidyl-prolyl cis-trans isomerase OS=Escherichia coli (strain B / BL21-DE3) OX=469008 GN=ECBD_3822 PE=3 SV=1	41.7476	10	206	22.2	4.96	High		7.40986e+08	10	29.4649
A0A140N993	NAD(P)H dehydrogenase (quinone) OS=Escherichia coli (strain B / BL21-DE3) OX=469008 GN=ECBD_2590 PE=3 SV=1	92.9293	14	198	20.8	5.86	High		7.2901e+08	14	29.4414
A0A140N4F6	Ribose-5-phosphate isomerase A OS=Escherichia coli (strain B / BL21-DE3) OX=469008 GN=rpiA PE=3 SV=1	66.6667	12	219	22.8	5.4	High		7.23569e+08	12	29.4306
A0A140NB59	Phosphofructokinase OS=Escherichia coli (strain B / BL21-DE3) OX=469008 GN=ECBD_1922 PE=3 SV=1	92.233	19	309	32.4	5.36	High	Met-loss [N-Term]	7.11825e+08	19	29.4069
A0A140N6V1	Peptidyl-prolyl cis-trans isomerase OS=Escherichia coli (strain B / BL21-DE3) OX=469008 GN=ECBD_0400 PE=3 SV=1	68.8776	7	196	20.8	5.05	High		7.0624e+08	7	29.3956
A0A140ND23	3-oxoacyl-(Acyl-carrier-protein) reductase OS=Escherichia coli (strain B / BL21-DE3) OX=469008 GN=ECBD_2508 PE=4 SV=1	87.7049	15	244	25.5	6.6	High		7.032e+08	15	29.3894
A0A140N5V1	Glyoxalase OS=Escherichia coli (strain B / BL21-DE3) OX=469008 GN=ECBD_0533 PE=3 SV=1	94.0092	13	217	23	4.77	High		7.03076e+08	13	29.3891
A0A140N7U4	6-phosphogluconate dehydrogenase, decarboxylating OS=Escherichia coli (strain B / BL21-DE3) OX=469008 GN=ECBD_1630 PE=3 SV=1	87.3932	46	468	51.5	5.07	High	Met-loss [N-Term]	6.84964e+08	46	29.3515
A0A140NDQ0	Regulator of ribonuclease activity B OS=Escherichia coli (strain B / BL21-DE3) OX=469008 GN=rraB PE=3 SV=1	39.8551	4	138	15.6	3.8	High	Met-loss [N-Term]	6.65757e+08	4	29.3104
A0A140NDI4	Phosphoserine aminotransferase OS=Escherichia coli (strain B / BL21-DE3) OX=469008 GN=serC PE=3 SV=1	74.8619	25	362	39.8	5.74	High	Met-loss [N-Term]	6.59269e+08	25	29.2963
A0A140N1Y4	L-threonine 3-dehydrogenase OS=Escherichia coli (strain B / BL21-DE3) OX=469008 GN=tdh PE=3 SV=1	67.1554	17	341	37.2	6.38	High		6.48783e+08	17	29.2732
A0A140N5J6	2-hydroxy-3-oxopropionate reductase OS=Escherichia coli (strain B / BL21-DE3) OX=469008 GN=garR PE=3 SV=1	97.2973	26	296	30.6	5.9	High		6.42919e+08	26	29.2601
A0A140ND02	Extracellular solute-binding protein family 5 OS=Escherichia coli (strain B / BL21-DE3) OX=469008 GN=ECBD_2379 PE=4 SV=1	79.9283	40	558	62.6	6.37	High		6.4016e+08	40	29.2539
A0A140N9E5	Glutamate--tRNA ligase OS=Escherichia coli (strain B / BL21-DE3) OX=469008 GN=gltX PE=3 SV=1	69.8514	34	471	53.8	5.94	High		6.38528e+08	34	29.2502
A0A140NB38	2-dehydro-3-deoxyphosphogluconate aldolase/4-hydroxy-2-oxoglutarate aldolase OS=Escherichia coli (strain B / BL21-DE3) OX=469008 GN=ECBD_1789 PE=1 SV=1	74.1784	16	213	22.3	5.67	High		6.09084e+08	16	29.1821
A0A140NEF6	Inorganic pyrophosphatase OS=Escherichia coli (strain B / BL21-DE3) OX=469008 GN=ppa PE=3 SV=1	97.7273	20	176	19.7	5.17	High	Met-loss [N-Term]	5.84239e+08	20	29.122
A0A140N312	Universal stress protein OS=Escherichia coli (strain B / BL21-DE3) OX=469008 GN=ECBD_0246 PE=3 SV=1	92.3611	11	144	16.1	5.29	High	Met-loss [N-Term]	5.67675e+08	11	29.0805
A0A140N2U0	DNA-directed RNA polymerase subunit alpha OS=Escherichia coli (strain B / BL21-DE3) OX=469008 GN=rpoA PE=3 SV=1	96.3526	33	329	36.5	5.06	High	Met-loss [N-Term]	5.67522e+08	33	29.0801
A0A140N810	Transketolase OS=Escherichia coli (strain B / BL21-DE3) OX=469008 GN=ECBD_0803 PE=3 SV=1	83.5596	40	663	72.2	5.67	High		567181452	43	29.0792
A0A140N7A5	Nucleoside diphosphate kinase OS=Escherichia coli (strain B / BL21-DE3) OX=469008 GN=ndk PE=3 SV=1	91.6084	10	143	15.5	5.81	High		5.55109e+08	10	29.0482
A0A140N4Y5	Aspartate-semialdehyde dehydrogenase OS=Escherichia coli (strain B / BL21-DE3) OX=469008 GN=asd PE=3 SV=1	61.3079	17	367	40	5.58	High	Met-loss [N-Term]	5.54984e+08	17	29.0479
A0A140NGH2	ABC transporter related OS=Escherichia coli (strain B / BL21-DE3) OX=469008 GN=ECBD_3629 PE=4 SV=1	85.2252	43	555	62.4	5.6	High	Met-loss [N-Term]	5.5386e+08	43	29.0449
A0A140N5K6	Endoribonuclease L-PSP OS=Escherichia coli (strain B / BL21-DE3) OX=469008 GN=ECBD_0627 PE=4 SV=1	39.5349	3	129	14	5.21	High		5.47547e+08	5	29.0284
A0A140N5L9	Cysteine synthase OS=Escherichia coli (strain B / BL21-DE3) OX=469008 GN=ECBD_1267 PE=3 SV=1	88.8545	25	323	34.5	6.06	High	Met-loss [N-Term]	5.45892e+08	25	29.024
A0A140NC56	Purine nucleoside phosphorylase DeoD-type OS=Escherichia coli (strain B / BL21-DE3) OX=469008 GN=deoD PE=3 SV=1	89.5397	23	239	25.9	5.66	High	Met-loss [N-Term]	5.40528e+08	23	29.0098
A0A140NBS3	Dihydrolipoyl dehydrogenase OS=Escherichia coli (strain B / BL21-DE3) OX=469008 GN=ECBD_3503 PE=3 SV=1	79.1139	42	474	50.7	6.15	High		5.36562e+08	42	28.9992
A0A140N752	Biotin carboxyl carrier protein of acetyl-CoA carboxylase OS=Escherichia coli (strain B / BL21-DE3) OX=469008 GN=ECBD_0490 PE=4 SV=1	71.1538	6	156	16.7	4.65	High		5.34454e+08	6	28.9935
A0A140N7C6	NH(3)-dependent NAD(+) synthetase OS=Escherichia coli (strain B / BL21-DE3) OX=469008 GN=nadE PE=3 SV=1	88.7273	22	275	30.6	5.78	High	Met-loss [N-Term]	5.28081e+08	22	28.9762
A0A140N913	3-oxoacyl-[acyl-carrier-protein] synthase 3 OS=Escherichia coli (strain B / BL21-DE3) OX=469008 GN=fabH PE=3 SV=1	55.205	12	317	33.5	5.25	High		5.22926e+08	12	28.962
A0A140N8Y0	Fumarate hydratase class I OS=Escherichia coli (strain B / BL21-DE3) OX=469008 GN=ECBD_2034 PE=3 SV=1	89.2336	36	548	60.3	6.55	High	Met-loss [N-Term]	4.93122e+08	53	28.8774
A0A140NFM6	Cell division protein FtsZ OS=Escherichia coli (strain B / BL21-DE3) OX=469008 GN=ftsZ PE=3 SV=1	97.6501	33	383	40.3	4.78	High	Met-loss [N-Term]	4.87112e+08	33	28.8597
A0A140N640	2,3-bisphosphoglycerate-independent phosphoglycerate mutase OS=Escherichia coli (strain B / BL21-DE3) OX=469008 GN=gpmI PE=3 SV=1	69.6498	31	514	56.1	5.34	High		4.85323e+08	31	28.8544
A0A140NCK8	Aconitate hydratase OS=Escherichia coli (strain B / BL21-DE3) OX=469008 GN=ECBD_2343 PE=3 SV=1	67.4523	51	891	97.6	5.88	High		4.83006e+08	51	28.8475
A0A140N8Q6	2-dehydro-3-deoxyphosphooctonate aldolase OS=Escherichia coli (strain B / BL21-DE3) OX=469008 GN=kdsA PE=3 SV=1	92.9577	28	284	30.8	6.8	High		4.81746e+08	28	28.8437
A0A140NCH9	DNA-binding protein OS=Escherichia coli (strain B / BL21-DE3) OX=469008 GN=ECBD_2385 PE=3 SV=1	88.3212	18	137	15.5	5.47	High	Met-loss [N-Term]	4.76008e+08	18	28.8264
A0A140N7J9	Acetyl-CoA carboxylase, biotin carboxylase OS=Escherichia coli (strain B / BL21-DE3) OX=469008 GN=ECBD_0489 PE=4 SV=1	69.265	36	449	49.3	7.11	High		4.7377e+08	36	28.8196
A0A140SS63	50S ribosomal protein L7/L12 OS=Escherichia coli (strain B / BL21-DE3) OX=469008 GN=rplL PE=3 SV=1	95.8678	18	121	12.3	4.65	High		4.71335e+08	18	28.8122
A0A140N6N2	Glycerol-3-phosphate dehydrogenase [NAD(P)+] OS=Escherichia coli (strain B / BL21-DE3) OX=469008 GN=gpsA PE=3 SV=1	50.1475	11	339	36.3	6.54	High		4.64483e+08	12	28.791
A0A140NF24	Histone family protein DNA-binding protein OS=Escherichia coli (strain B / BL21-DE3) OX=469008 GN=ECBD_4032 PE=3 SV=1	71.1111	9	90	9.5	9.58	High		4.51445e+08	9	28.75
A0A140N6F6	Oligopeptidase A OS=Escherichia coli (strain B / BL21-DE3) OX=469008 GN=ECBD_0243 PE=3 SV=1	68.8235	49	680	77.1	5.24	High	Met-loss [N-Term]	4.51353e+08	49	28.7497
A0A140N7C1	Tryptophan--tRNA ligase OS=Escherichia coli (strain B / BL21-DE3) OX=469008 GN=trpS PE=3 SV=1	86.8263	27	334	37.4	6.74	High	Met-loss [N-Term]	4.4442e+08	27	28.7273
A0A140NBN1	Short-chain dehydrogenase/reductase SDR OS=Escherichia coli (strain B / BL21-DE3) OX=469008 GN=ECBD_2100 PE=3 SV=1	82.2581	12	248	27.2	6	High		4.444e+08	12	28.7273
A0A140NE14	Lysine--tRNA ligase OS=Escherichia coli (strain B / BL21-DE3) OX=469008 GN=lysS PE=3 SV=1	85.5446	33	505	57.8	5.24	High		4.44142e+08	49	28.7264
A0A140NEK3	Regulator of ribonuclease activity A OS=Escherichia coli (strain B / BL21-DE3) OX=469008 GN=rraA PE=3 SV=1	59.0062	8	161	17.4	4.2	High		4.43971e+08	8	28.7259
A0A140N751	Uracil phosphoribosyltransferase OS=Escherichia coli (strain B / BL21-DE3) OX=469008 GN=upp PE=3 SV=1	88.4615	17	208	22.5	5.47	High		4.40343e+08	17	28.7141
A0A140NHC7	GTP-binding protein TypA OS=Escherichia coli (strain B / BL21-DE3) OX=469008 GN=ECBD_4156 PE=4 SV=1	52.0593	31	607	67.3	5.33	High		4.40277e+08	31	28.7138
A0A140N3N8	N-acetylneuraminate lyase OS=Escherichia coli (strain B / BL21-DE3) OX=469008 GN=nanA PE=3 SV=1	81.4815	23	297	32.6	5.9	High		4.35543e+08	23	28.6982
A0A140NAW9	Adenylate kinase OS=Escherichia coli (strain B / BL21-DE3) OX=469008 GN=adk PE=3 SV=1	73.8318	22	214	23.6	5.76	High		432538862	22	28.6883
A0A140NAR5	Ribosome-binding ATPase YchF OS=Escherichia coli (strain B / BL21-DE3) OX=469008 GN=ychF PE=3 SV=1	85.6749	26	363	39.6	4.92	High		4.2707e+08	26	28.6699
A0A140NAX1	L-serine dehydratase 1 OS=Escherichia coli (strain B / BL21-DE3) OX=469008 GN=ECBD_1828 PE=4 SV=1	57.0485	18	454	48.9	5.34	High	Met-loss [N-Term]	4.26071e+08	21	28.6665
A0A140NFE6	5'-methylthioadenosine/S-adenosylhomocysteine nucleosidase OS=Escherichia coli (strain B / BL21-DE3) OX=469008 GN=mtnN PE=3 SV=1	84.0517	10	232	24.3	5.25	High		4.2206e+08	10	28.6529
A0A140SSB0	Uridine phosphorylase OS=Escherichia coli (strain B / BL21-DE3) OX=469008 GN=ECBD_4198 PE=3 SV=1	80.7087	17	254	27.3	6.43	High	Met-loss [N-Term]	4.16667e+08	17	28.6343
A0A140N8N0	S-ribosylhomocysteine lyase OS=Escherichia coli (strain B / BL21-DE3) OX=469008 GN=luxS PE=3 SV=1	93.5673	18	171	19.4	5.36	High	Met-loss [N-Term]	4.16331e+08	18	28.6332
A0A140NBF4	Succinate--CoA ligase [ADP-forming] subunit beta OS=Escherichia coli (strain B / BL21-DE3) OX=469008 GN=sucC PE=3 SV=1	77.3196	34	388	41.4	5.52	High	Met-loss [N-Term]	4.15486e+08	34	28.6302
A0A140N8Q9	Asparagine--tRNA ligase OS=Escherichia coli (strain B / BL21-DE3) OX=469008 GN=asnS PE=3 SV=1	70.8155	33	466	52.5	5.31	High	Met-loss [N-Term]	4.15365e+08	33	28.6298
A0A140NFE9	Outer membrane chaperone Skp (OmpH) OS=Escherichia coli (strain B / BL21-DE3) OX=469008 GN=ECBD_3441 PE=3 SV=1	55.9006	10	161	17.7	9.7	High		4.09123e+08	10	28.608
A0A140N6F1	Cytochrome-c3 hydrogenase OS=Escherichia coli (strain B / BL21-DE3) OX=469008 GN=ECBD_0744 PE=3 SV=1	74.2504	28	567	62.5	6.28	High		4.07098e+08	28	28.6008
A0A140N5B5	Iron-containing alcohol dehydrogenase OS=Escherichia coli (strain B / BL21-DE3) OX=469008 GN=ECBD_0729 PE=4 SV=1	76.7442	24	387	42.1	6.13	High		3.97115e+08	24	28.565
A0A140N9N7	UDP-4-amino-4-deoxy-L-arabinose--oxoglutarate aminotransferase OS=Escherichia coli (strain B / BL21-DE3) OX=469008 GN=arnB PE=3 SV=1	55.6728	15	379	41.6	6.89	High	Met-loss [N-Term]	3.96248e+08	15	28.5618
A0A140N4G2	Protein-export protein SecB OS=Escherichia coli (strain B / BL21-DE3) OX=469008 GN=secB PE=3 SV=1	45.1613	7	155	17.3	4.37	High	Met-loss+Acetyl [N-Term]	3.90085e+08	7	28.5392
A0A140N9G2	Succinate--CoA ligase [ADP-forming] subunit alpha OS=Escherichia coli (strain B / BL21-DE3) OX=469008 GN=sucD PE=3 SV=1	77.5087	25	289	29.8	6.79	High	Met-loss [N-Term]	3.78718e+08	25	28.4965
A0A140NBD3	Phospho-2-dehydro-3-deoxyheptonate aldolase OS=Escherichia coli (strain B / BL21-DE3) OX=469008 GN=ECBD_2913 PE=3 SV=1	67.1429	16	350	38	6.6	High	Met-loss [N-Term]	3.77031e+08	18	28.4901
A0A140SSA6	Xaa-Pro dipeptidase OS=Escherichia coli (strain B / BL21-DE3) OX=469008 GN=pepQ PE=3 SV=1	64.5598	19	443	50.1	5.99	High	Met-loss [N-Term]	3.74912e+08	19	28.482
A0A140N6A5	Chaperone protein ClpB OS=Escherichia coli (strain B / BL21-DE3) OX=469008 GN=clpB PE=3 SV=1	89.0315	88	857	95.5	5.52	High		3.63164e+08	88	28.436
A0A140NCD7	Glucose-6-phosphate isomerase OS=Escherichia coli (strain B / BL21-DE3) OX=469008 GN=pgi PE=3 SV=1	73.9526	40	549	61.5	6.29	High		3.59505e+08	40	28.4214
A0A140N5R4	Quinone oxidoreductase, YhdH/YhfP family OS=Escherichia coli (strain B / BL21-DE3) OX=469008 GN=ECBD_0493 PE=4 SV=1	58.9506	17	324	34.7	5.91	High		3.5656e+08	17	28.4096
A0A140N6R6	Glyoxylate/hydroxypyruvate reductase B OS=Escherichia coli (strain B / BL21-DE3) OX=469008 GN=ghrB PE=3 SV=1	90.4321	16	324	35.4	5.71	High		3.45774e+08	16	28.3653
A0A140N6E7	Peptide chain release factor 2 OS=Escherichia coli (strain B / BL21-DE3) OX=469008 GN=prfB PE=3 SV=1	63.8356	24	365	41.2	4.75	High		3.32873e+08	24	28.3104
A0A140NEY8	2',3'-cyclic-nucleotide 2'-phosphodiesterase OS=Escherichia coli (strain B / BL21-DE3) OX=469008 GN=ECBD_3816 PE=3 SV=1	74.8068	39	647	70.8	5.73	High		3.31711e+08	39	28.3054
A0A140NBF5	Serine--tRNA ligase OS=Escherichia coli (strain B / BL21-DE3) OX=469008 GN=serS PE=3 SV=1	80.6977	36	430	48.4	5.5	High	Met-loss [N-Term]	3.29852e+08	36	28.2972
A0A140NCU1	Malonyl CoA-acyl carrier protein transacylase OS=Escherichia coli (strain B / BL21-DE3) OX=469008 GN=ECBD_2509 PE=3 SV=1	73.4628	18	309	32.4	5.03	High		3.27439e+08	18	28.2867
A0A140N9N5	Phosphoenolpyruvate-protein phosphotransferase OS=Escherichia coli (strain B / BL21-DE3) OX=469008 GN=ECBD_1265 PE=3 SV=1	87.1304	50	575	63.5	4.87	High	Met-loss [N-Term]	3.1539e+08	51	28.2326
A0A140NDQ1	Xanthine phosphoribosyltransferase OS=Escherichia coli (strain B / BL21-DE3) OX=469008 GN=gpt PE=3 SV=1	55.2632	8	152	17	5.85	High		3.13337e+08	8	28.2231
A0A140N5H3	OsmC family protein OS=Escherichia coli (strain B / BL21-DE3) OX=469008 GN=ECBD_0392 PE=4 SV=1	48.5075	7	134	14.5	5.81	High		3.10977e+08	7	28.2122
A0A140NDZ7	RNA polymerase-binding transcription factor DksA OS=Escherichia coli (strain B / BL21-DE3) OX=469008 GN=dksA PE=3 SV=1	80.1325	13	151	17.5	5.12	High		3.08754e+08	13	28.2019
A0A140NBX3	Peptidyl-dipeptidase Dcp OS=Escherichia coli (strain B / BL21-DE3) OX=469008 GN=ECBD_2101 PE=3 SV=1	52.2048	28	703	80	5.91	High		3.06059e+08	28	28.1892
A0A140NA20	Dihydroxyacetone kinase, DhaK subunit OS=Escherichia coli (strain B / BL21-DE3) OX=469008 GN=ECBD_2422 PE=4 SV=1	61.5169	15	356	38.2	4.98	High		3.04252e+08	15	28.1807
A0A140NF32	50S ribosomal protein L11 OS=Escherichia coli (strain B / BL21-DE3) OX=469008 GN=rplK PE=3 SV=1	42.9577	7	142	14.9	9.63	High		3.03686e+08	7	28.178
A0A140NBR3	Carbonic anhydrase OS=Escherichia coli (strain B / BL21-DE3) OX=469008 GN=ECBD_3493 PE=1 SV=1	56.3636	10	220	25.1	6.65	High	Met-loss [N-Term]	3.02485e+08	10	28.1723
A0A140N9A7	Translational regulator CsrA OS=Escherichia coli (strain B / BL21-DE3) OX=469008 GN=csrA PE=3 SV=1	91.8033	9	61	6.9	8.62	High	Met-loss [N-Term]	3.00401e+08	9	28.1623
A0A140NDT0	Aminopeptidase N OS=Escherichia coli (strain B / BL21-DE3) OX=469008 GN=ECBD_2663 PE=4 SV=1	74.023	51	870	98.9	5.31	High		2.90961e+08	51	28.1163
A0A140ND59	Aspartate--ammonia ligase OS=Escherichia coli (strain B / BL21-DE3) OX=469008 GN=asnA PE=3 SV=1	66.9697	17	330	36.6	5.74	High		2.88787e+08	17	28.1054
A0A140N5P6	Putative transferase OS=Escherichia coli (strain B / BL21-DE3) OX=469008 GN=ECBD_0472 PE=4 SV=1	100	16	184	20.2	5.53	High	Met-loss [N-Term]; Met-loss+Acetyl [N-Term]	2.83977e+08	16	28.0812
A0A140N6K5	Deoxyuridine 5'-triphosphate nucleotidohydrolase OS=Escherichia coli (strain B / BL21-DE3) OX=469008 GN=dut PE=3 SV=1	69.0789	5	152	16.3	5.11	High		2.80992e+08	5	28.066
A0A140N849	Aspartate-semialdehyde dehydrogenase OS=Escherichia coli (strain B / BL21-DE3) OX=469008 GN=ECBD_1340 PE=3 SV=1	78.3383	16	337	36.3	4.48	High	Met-loss [N-Term]	279505039	16	28.0583
A0A140N4A1	Mannitol-1-phosphate 5-dehydrogenase OS=Escherichia coli (strain B / BL21-DE3) OX=469008 GN=mtlD PE=3 SV=1	76.178	25	382	41.1	5.58	High		2.77035e+08	25	28.0455
A0A140NEG9	Acetylglutamate kinase OS=Escherichia coli (strain B / BL21-DE3) OX=469008 GN=argB PE=1 SV=1	73.2558	16	258	27.1	5.62	High	Met-loss [N-Term]	2.75323e+08	16	28.0365
A0A140NAB7	Glutamine--tRNA ligase OS=Escherichia coli (strain B / BL21-DE3) OX=469008 GN=glnS PE=1 SV=1	80.1444	51	554	63.4	6.28	High	Met-loss [N-Term]	2.74776e+08	51	28.0337
A0A140N9D5	Cysteine desulfurase IscS OS=Escherichia coli (strain B / BL21-DE3) OX=469008 GN=iscS PE=3 SV=1	68.5644	28	404	45.1	6.37	High		2.71426e+08	28	28.016
A0A140NBN4	Iron-sulfur cluster insertion protein ErpA OS=Escherichia coli (strain B / BL21-DE3) OX=469008 GN=erpA PE=3 SV=1	90.3509	7	114	12.1	4.31	High	Met-loss [N-Term]; Met-loss+Acetyl [N-Term]	2.69405e+08	7	28.0052
A0A140N782	Sulfatase OS=Escherichia coli (strain B / BL21-DE3) OX=469008 GN=ECBD_2141 PE=4 SV=1	79.2857	35	560	62.8	6.16	High		2.64739e+08	35	27.98
A0A140N500	Transcriptional regulator, MarR family OS=Escherichia coli (strain B / BL21-DE3) OX=469008 GN=ECBD_1036 PE=4 SV=1	80.1136	13	176	20.6	6.21	High		2.62082e+08	13	27.9654
A0A140N1P7	Cof-like hydrolase OS=Escherichia coli (strain B / BL21-DE3) OX=469008 GN=ECBD_0006 PE=4 SV=1	67.4074	12	270	29.7	5.26	High		2.57571e+08	12	27.9404
A0A140NFF9	Uncharacterized protein OS=Escherichia coli (strain B / BL21-DE3) OX=469008 GN=ECBD_4172 PE=4 SV=1	82.0225	13	89	10.3	5.26	High		2.56783e+08	13	27.936
A0A140N8Y2	Thymidylate synthase OS=Escherichia coli (strain B / BL21-DE3) OX=469008 GN=thyA PE=3 SV=1	46.9697	12	264	30.4	5.87	High		2.56524e+08	12	27.9345
A0A140NE13	Ferric uptake regulation protein OS=Escherichia coli (strain B / BL21-DE3) OX=469008 GN=fur PE=3 SV=1	81.0811	11	148	16.8	6.11	High		2.5461e+08	11	27.9237
A0A140N5I0	Peptidyl-prolyl cis-trans isomerase OS=Escherichia coli (strain B / BL21-DE3) OX=469008 GN=ECBD_0402 PE=3 SV=1	62.2222	23	270	28.9	8.47	High		2.52745e+08	23	27.9131
A0A140NFN5	UDP-N-acetylmuramoyl-L-alanyl-D-glutamate--2,6-diaminopimelate ligase OS=Escherichia coli (strain B / BL21-DE3) OX=469008 GN=murE PE=3 SV=1	78.7879	26	495	53.3	5.73	High		2.4895e+08	26	27.8913
A0A140NDN0	D-alanine--D-alanine ligase OS=Escherichia coli (strain B / BL21-DE3) OX=469008 GN=ddl PE=3 SV=1	65.6863	15	306	32.9	4.81	High	Met-loss [N-Term]	2.48327e+08	15	27.8877
A0A140NAE3	Glyoxylate/hydroxypyruvate reductase A OS=Escherichia coli (strain B / BL21-DE3) OX=469008 GN=ghrA PE=3 SV=1	85.5769	21	312	35.3	6.8	High		2.47871e+08	21	27.885
A0A140N6N3	Phosphoribosylaminoimidazole-succinocarboxamide synthase OS=Escherichia coli (strain B / BL21-DE3) OX=469008 GN=purC PE=3 SV=1	71.308	17	237	27	5.16	High		2.47753e+08	17	27.8843
A0A140SS30	Elongation factor P OS=Escherichia coli (strain B / BL21-DE3) OX=469008 GN=efp PE=3 SV=1	27.1277	4	188	20.6	5.02	High	Met-loss [N-Term]	2.47302e+08	4	27.8817
A0A140NH75	Cell division protein ZapB OS=Escherichia coli (strain B / BL21-DE3) OX=469008 GN=zapB PE=3 SV=1	94.9367	10	79	9.4	4.67	High	Met-loss [N-Term]	2.45424e+08	10	27.8707
A0A140N5D3	Glutathione S-transferase domain protein OS=Escherichia coli (strain B / BL21-DE3) OX=469008 GN=ECBD_0749 PE=4 SV=1	46.1806	13	288	32.4	6.7	High		2.43164e+08	13	27.8574
A0A140N6I5	Selenide, water dikinase OS=Escherichia coli (strain B / BL21-DE3) OX=469008 GN=selD PE=3 SV=1	75.2161	18	347	36.7	5.43	High		241191542	18	27.8456
A0A140N8N3	UTP--glucose-1-phosphate uridylyltransferase OS=Escherichia coli (strain B / BL21-DE3) OX=469008 GN=ECBD_2386 PE=3 SV=1	73.5099	18	302	32.9	5.24	High		2.40993e+08	18	27.8444
A0A140NCM3	tRNA-specific 2-thiouridylase MnmA OS=Escherichia coli (strain B / BL21-DE3) OX=469008 GN=mnmA PE=3 SV=1	61.6848	15	368	40.9	5.06	High		2.39355e+08	15	27.8346
A0A140NC45	ABC transporter related OS=Escherichia coli (strain B / BL21-DE3) OX=469008 GN=ECBD_2803 PE=4 SV=1	56.2264	27	530	59.8	5.08	High		2.38378e+08	27	27.8287
A0A140NFA9	Histone family protein DNA-binding protein OS=Escherichia coli (strain B / BL21-DE3) OX=469008 GN=ECBD_3215 PE=3 SV=1	77.7778	10	90	9.2	9.7	High		2.37926e+08	10	27.8259
A0A140NC71	Glycosyl transferase, family 3-like protein OS=Escherichia coli (strain B / BL21-DE3) OX=469008 GN=ECBD_2823 PE=4 SV=1	71.875	19	320	35	6.86	High		2.37436e+08	19	27.823
A0A140N932	CTP synthase OS=Escherichia coli (strain B / BL21-DE3) OX=469008 GN=pyrG PE=3 SV=1	75.9633	41	545	60.3	5.94	High	Met-loss [N-Term]	2.36478e+08	41	27.8171
A0A140N983	Arginine--tRNA ligase OS=Escherichia coli (strain B / BL21-DE3) OX=469008 GN=argS PE=3 SV=1	71.9237	45	577	64.6	5.49	High		2.35295e+08	45	27.8099
A0A140N770	4-hydroxy-tetrahydrodipicolinate synthase OS=Escherichia coli (strain B / BL21-DE3) OX=469008 GN=dapA PE=3 SV=1	57.1918	13	292	31.3	6.44	High		2.34666e+08	14	27.806
A0A140N822	Cytidine deaminase OS=Escherichia coli (strain B / BL21-DE3) OX=469008 GN=cdd PE=3 SV=1	54.4218	14	294	31.5	5.73	High		2.30176e+08	14	27.7782
A0A140N9Q4	Ribonucleoside-diphosphate reductase OS=Escherichia coli (strain B / BL21-DE3) OX=469008 GN=ECBD_1426 PE=3 SV=1	58.0815	37	761	85.7	6.18	High		2.29844e+08	37	27.7761
A0A140NA80	Succinate dehydrogenase flavoprotein subunit OS=Escherichia coli (strain B / BL21-DE3) OX=469008 GN=ECBD_2937 PE=3 SV=1	68.0272	35	588	64.4	6.27	High		2.29403e+08	35	27.7733
A0A140NCR5	Acyl carrier protein OS=Escherichia coli (strain B / BL21-DE3) OX=469008 GN=acpP PE=3 SV=1	42.3077	4	78	8.6	4.06	High	Met-loss [N-Term]	2.28846e+08	4	27.7698
A0A140NGU5	Acetyl-coenzyme A synthetase OS=Escherichia coli (strain B / BL21-DE3) OX=469008 GN=acs PE=3 SV=1	65.7975	30	652	72	5.8	High		2.27644e+08	30	27.7622
A0A140N2J1	33 kDa chaperonin OS=Escherichia coli (strain B / BL21-DE3) OX=469008 GN=hslO PE=3 SV=1	73.2877	11	292	32.5	4.49	High		2.26442e+08	11	27.7546
A0A140NF13	S-(hydroxymethyl)glutathione dehydrogenase OS=Escherichia coli (strain B / BL21-DE3) OX=469008 GN=ECBD_3301 PE=3 SV=1	61.5176	13	369	39.3	6.28	High		2.262e+08	13	27.753
A0A140NAR3	Cysteine--tRNA ligase OS=Escherichia coli (strain B / BL21-DE3) OX=469008 GN=cysS PE=3 SV=1	70.282	29	461	52.2	5.57	High		2.23268e+08	29	27.7342
A0A140N644	Glutamate--cysteine ligase OS=Escherichia coli (strain B / BL21-DE3) OX=469008 GN=gshA PE=3 SV=1	59.4595	24	518	58.2	5.39	High	Met-loss [N-Term]	2.23038e+08	24	27.7327
A0A140NE54	UPF0250 protein YbeD OS=Escherichia coli (strain B / BL21-DE3) OX=469008 GN=ybeD PE=3 SV=1	88.5057	5	87	9.8	5.76	High		2.20319e+08	5	27.715
A0A140NGN0	Aspartate ammonia-lyase OS=Escherichia coli (strain B / BL21-DE3) OX=469008 GN=ECBD_3892 PE=3 SV=1	90.5858	38	478	52.3	5.29	High	Met-loss [N-Term]	2.19705e+08	38	27.711
A0A140SS84	Acetylornithine deacetylase OS=Escherichia coli (strain B / BL21-DE3) OX=469008 GN=argE PE=3 SV=1	73.107	17	383	42.3	5.9	High		2.19244e+08	17	27.708
A0A140NE18	Hypoxanthine phosphoribosyltransferase OS=Escherichia coli (strain B / BL21-DE3) OX=469008 GN=ECBD_3494 PE=3 SV=1	72.5275	19	182	20.6	5.21	High		2.16865e+08	20	27.6922
A0A140NDF0	D-alanine--D-alanine ligase OS=Escherichia coli (strain B / BL21-DE3) OX=469008 GN=ddl PE=3 SV=1	61.5385	18	364	39.3	5.19	High		2.14512e+08	18	27.6765
A0A140NFH4	Maltose operon periplasmic OS=Escherichia coli (strain B / BL21-DE3) OX=469008 GN=ECBD_3998 PE=4 SV=1	41.8301	13	306	31.9	8.02	High		2.11324e+08	13	27.6549
A0A140N6H9	tRNA (cytidine/uridine-2'-O-)-methyltransferase TrmJ OS=Escherichia coli (strain B / BL21-DE3) OX=469008 GN=trmJ PE=4 SV=1	53.252	10	246	27	6	High		2.08311e+08	10	27.6342
A0A140N852	Alcohol dehydrogenase zinc-binding domain protein OS=Escherichia coli (strain B / BL21-DE3) OX=469008 GN=ECBD_2190 PE=4 SV=1	73.6232	17	345	37.6	5.82	High		2.08304e+08	17	27.6341
A0A140N991	Transaldolase OS=Escherichia coli (strain B / BL21-DE3) OX=469008 GN=tal PE=3 SV=1	87.0253	27	316	35.6	6.27	High		2.08292e+08	29	27.634
A0A140NC65	Peptide chain release factor 3 OS=Escherichia coli (strain B / BL21-DE3) OX=469008 GN=prfC PE=3 SV=1	54.4423	21	529	59.5	5.97	High	Met-loss [N-Term]	2.08203e+08	21	27.6334
A0A140NAI0	Peptide chain release factor 1 OS=Escherichia coli (strain B / BL21-DE3) OX=469008 GN=prfA PE=3 SV=1	57.2222	17	360	40.5	5.26	High		2.07754e+08	17	27.6303
A0A140N7N1	Glutathione S-transferase domain protein OS=Escherichia coli (strain B / BL21-DE3) OX=469008 GN=ECBD_2008 PE=4 SV=1	92.5373	14	201	22.9	6.21	High		2.07331e+08	14	27.6274
A0A140NFR6	Chaperone SurA OS=Escherichia coli (strain B / BL21-DE3) OX=469008 GN=surA PE=3 SV=1	70.3271	21	428	47.3	6.98	High		205611272	21	27.6153
A0A140NE43	tRNA-2-methylthio-N(6)-dimethylallyladenosine synthase OS=Escherichia coli (strain B / BL21-DE3) OX=469008 GN=miaB PE=3 SV=1	71.519	30	474	53.6	5.34	High		2.03899e+08	30	27.6033
A0A140N2B1	Glutathione-disulfide reductase OS=Escherichia coli (strain B / BL21-DE3) OX=469008 GN=ECBD_0241 PE=3 SV=1	81.7778	25	450	48.7	6	High	Met-loss [N-Term]	2.03077e+08	25	27.5975
A0A140N914	Nitroreductase OS=Escherichia coli (strain B / BL21-DE3) OX=469008 GN=ECBD_1879 PE=4 SV=1	68.306	13	183	20	6.79	High	Met-loss [N-Term]	2.02814e+08	13	27.5956
A0A140NFS6	UDP-N-acetylmuramoyl-tripeptide--D-alanyl-D-alanine ligase OS=Escherichia coli (strain B / BL21-DE3) OX=469008 GN=murF PE=3 SV=1	47.5664	17	452	47.4	5.44	High		2.0277e+08	18	27.5953
A0A140NE25	Glutamine--fructose-6-phosphate aminotransferase [isomerizing] OS=Escherichia coli (strain B / BL21-DE3) OX=469008 GN=glmS PE=3 SV=1	84.2365	48	609	66.9	5.87	High	Met-loss [N-Term]	1.99826e+08	48	27.5742
A0A140NBW4	Riboflavin synthase, alpha subunit OS=Escherichia coli (strain B / BL21-DE3) OX=469008 GN=ECBD_1981 PE=4 SV=1	55.3991	9	213	23.4	5.99	High	Met-loss [N-Term]	1.96524e+08	9	27.5501
A0A140NGG3	Two component transcriptional regulator, winged helix family OS=Escherichia coli (strain B / BL21-DE3) OX=469008 GN=ECBD_3619 PE=4 SV=1	60.9244	16	238	27.3	5.33	High		1.85028e+08	16	27.4632
A0A140N4N0	Orotate phosphoribosyltransferase OS=Escherichia coli (strain B / BL21-DE3) OX=469008 GN=pyrE PE=3 SV=1	60.5634	11	213	23.6	5.48	High		1.84828e+08	11	27.4616
A0A140N9A4	PTS system, glucose subfamily, IIA subunit OS=Escherichia coli (strain B / BL21-DE3) OX=469008 GN=ECBD_1264 PE=4 SV=1	90.5325	15	169	18.2	4.84	High	Met-loss [N-Term]; Met-loss+Acetyl [N-Term]	1.8297e+08	15	27.447
A0A140NED8	Peptidase U62 modulator of DNA gyrase OS=Escherichia coli (strain B / BL21-DE3) OX=469008 GN=ECBD_3799 PE=4 SV=1	83.7778	27	450	48.3	5.6	High		1.81633e+08	27	27.4365
A0A140N801	Glutathione synthetase OS=Escherichia coli (strain B / BL21-DE3) OX=469008 GN=gshB PE=3 SV=1	76.5823	22	316	35.5	5.22	High		1.81034e+08	22	27.4317
A0A140NBB5	Alcohol dehydrogenase zinc-binding domain protein OS=Escherichia coli (strain B / BL21-DE3) OX=469008 GN=ECBD_3332 PE=3 SV=1	60.1719	18	349	38	6.23	High		1.79633e+08	18	27.4205
A0A140NEW5	Aminotransferase OS=Escherichia coli (strain B / BL21-DE3) OX=469008 GN=ECBD_3979 PE=3 SV=1	63.728	18	397	43.5	5.48	High		1.77769e+08	18	27.4054
A0A140N5T6	Erythronate-4-phosphate dehydrogenase OS=Escherichia coli (strain B / BL21-DE3) OX=469008 GN=pdxB PE=3 SV=1	73.8095	28	378	41.4	6.7	High		1.7655e+08	28	27.3955
A0A140ND77	3-deoxy-manno-octulosonate cytidylyltransferase OS=Escherichia coli (strain B / BL21-DE3) OX=469008 GN=kdsB PE=3 SV=1	83.871	16	248	27.6	5.27	High	Met-loss [N-Term]	1.72911e+08	16	27.3655
A0A140NCP3	Thioredoxin domain protein OS=Escherichia coli (strain B / BL21-DE3) OX=469008 GN=ECBD_3164 PE=4 SV=1	64.7887	13	284	31.8	4.59	High		1.72528e+08	13	27.3623
A0A140NE56	Mannonate dehydratase OS=Escherichia coli (strain B / BL21-DE3) OX=469008 GN=uxuA PE=3 SV=1	69.0355	22	394	44.8	5.62	High		1.71745e+08	22	27.3557
A0A140N846	50S ribosomal protein L25 OS=Escherichia coli (strain B / BL21-DE3) OX=469008 GN=rplY PE=3 SV=1	75.5319	12	94	10.7	9.6	High	Met-loss [N-Term]	1.69202e+08	12	27.3342
A0A140N582	Cell shape determining protein, MreB/Mrl family OS=Escherichia coli (strain B / BL21-DE3) OX=469008 GN=ECBD_0496 PE=4 SV=1	58.7896	19	347	36.9	5.26	High		1.6916e+08	19	27.3338
A0A140ND30	UDP-N-acetylmuramoylalanine--D-glutamate ligase OS=Escherichia coli (strain B / BL21-DE3) OX=469008 GN=murD PE=3 SV=1	48.1735	15	438	46.9	5.31	High		1.67637e+08	15	27.3208
A0A140NE23	Asparagine synthase (Glutamine-hydrolyzing) OS=Escherichia coli (strain B / BL21-DE3) OX=469008 GN=ECBD_2988 PE=4 SV=1	71.6606	35	554	62.6	5.87	High		1.64987e+08	35	27.2978
A0A140N5V4	Phosphoesterase OS=Escherichia coli (strain B / BL21-DE3) OX=469008 GN=ECBD_1359 PE=3 SV=1	71.0383	6	183	20	6.05	High		1.62972e+08	6	27.28
A0A140NC67	Phosphoglucomutase, alpha-D-glucose phosphate-specific OS=Escherichia coli (strain B / BL21-DE3) OX=469008 GN=ECBD_2973 PE=3 SV=1	78.022	36	546	58.4	5.71	High		1.61462e+08	36	27.2666
A0A140NGE4	Oxidoreductase domain protein OS=Escherichia coli (strain B / BL21-DE3) OX=469008 GN=ECBD_3762 PE=4 SV=1	53.2258	20	372	41.4	6.57	High		1.61081e+08	20	27.2632
A0A140N6Z4	Isochorismatase hydrolase OS=Escherichia coli (strain B / BL21-DE3) OX=469008 GN=ECBD_1771 PE=4 SV=1	68.617	10	188	20.4	5.57	High		1.60874e+08	10	27.2614
A0A140NBK8	Glutathione S-transferase domain protein OS=Escherichia coli (strain B / BL21-DE3) OX=469008 GN=ECBD_2785 PE=3 SV=1	70.1923	15	208	23.7	5.17	High	Met-loss [N-Term]	1.59286e+08	15	27.247
A0A140N4P3	4-hydroxy-3-methylbut-2-en-1-yl diphosphate synthase (flavodoxin) OS=Escherichia coli (strain B / BL21-DE3) OX=469008 GN=ispG PE=3 SV=1	73.6559	30	372	40.7	6.21	High		1.57508e+08	30	27.2308
A0A140N3Y7	Aldo/keto reductase OS=Escherichia coli (strain B / BL21-DE3) OX=469008 GN=ECBD_0890 PE=4 SV=1	51.1561	14	346	38.5	6.76	High		1.56092e+08	14	27.2178
A0A140NC74	UspA domain protein OS=Escherichia coli (strain B / BL21-DE3) OX=469008 GN=ECBD_2284 PE=4 SV=1	79.7468	15	316	35.7	5.31	High	Met-loss [N-Term]	1.54098e+08	15	27.1993
A0A140N2F9	Oxidoreductase domain protein OS=Escherichia coli (strain B / BL21-DE3) OX=469008 GN=ECBD_0302 PE=4 SV=1	56.5217	19	345	38.7	6.54	High		1.53008e+08	19	27.189
A0A140N9M5	Short-chain dehydrogenase/reductase SDR OS=Escherichia coli (strain B / BL21-DE3) OX=469008 GN=ECBD_1255 PE=4 SV=1	60.8365	14	263	27.8	5.27	High		1.52726e+08	14	27.1864
A0A140NCB1	Alcohol dehydrogenase zinc-binding domain protein OS=Escherichia coli (strain B / BL21-DE3) OX=469008 GN=ECBD_3982 PE=4 SV=1	55.6575	13	327	35.2	8.57	High		1.51122e+08	13	27.1711
A0A140SS75	ATP-dependent 6-phosphofructokinase OS=Escherichia coli (strain B / BL21-DE3) OX=469008 GN=pfkA PE=3 SV=1	78.75	21	320	34.8	5.72	High		1.504e+08	21	27.1642
A0A140N9I5	Dihydroneopterin aldolase OS=Escherichia coli (strain B / BL21-DE3) OX=469008 GN=ECBD_1356 PE=4 SV=1	89.1667	10	120	14.1	7.06	High	Met-loss [N-Term]	1.49201e+08	10	27.1527
A0A140N8S8	Lysine--tRNA ligase OS=Escherichia coli (strain B / BL21-DE3) OX=469008 GN=lysS PE=3 SV=1	91.8812	31	505	57.6	5.24	High	Met-loss [N-Term]; Met-loss+Acetyl [N-Term]	1.48583e+08	47	27.1467
A0A140N7A8	Dyp-type peroxidase family OS=Escherichia coli (strain B / BL21-DE3) OX=469008 GN=ECBD_1251 PE=4 SV=1	73.913	18	299	33.1	5.54	High	Met-loss [N-Term]	1.47884e+08	18	27.1399
A0A140NBM6	Methylglyoxal synthase OS=Escherichia coli (strain B / BL21-DE3) OX=469008 GN=mgsA PE=3 SV=1	56.5789	5	152	16.9	6.64	High		1.46478e+08	5	27.1261
A0A140N6F4	Flavohemoprotein OS=Escherichia coli (strain B / BL21-DE3) OX=469008 GN=hmp PE=3 SV=1	80.8081	20	396	43.8	5.77	High	Met-loss [N-Term]	1.44371e+08	20	27.1052
A0A140NHM8	Soluble pyridine nucleotide transhydrogenase OS=Escherichia coli (strain B / BL21-DE3) OX=469008 GN=sthA PE=3 SV=1	83.691	26	466	51.5	6.57	High	Met-loss [N-Term]	1.4351e+08	26	27.0966
A0A140NFL4	Transferase hexapeptide repeat containing protein OS=Escherichia coli (strain B / BL21-DE3) OX=469008 GN=ECBD_3315 PE=4 SV=1	46.1165	8	206	23.1	6.73	High	Acetyl [N-Term]	1.43321e+08	8	27.0947
A0A140NDI3	2-hydroxyglutaryl-CoA dehydratase D-component OS=Escherichia coli (strain B / BL21-DE3) OX=469008 GN=ECBD_3695 PE=4 SV=1	61.3577	20	383	42.7	5.15	High	Met-loss [N-Term]	1.42419e+08	20	27.0856
A0A140NFA1	Two component transcriptional regulator, winged helix family OS=Escherichia coli (strain B / BL21-DE3) OX=469008 GN=ECBD_4111 PE=4 SV=1	63.7931	14	232	26.3	5.66	High		1.42373e+08	14	27.0851
A0A140N6J8	Regulatory protein GalF OS=Escherichia coli (strain B / BL21-DE3) OX=469008 GN=ECBD_1613 PE=4 SV=1	58.2492	12	297	32.8	6	High		1.41286e+08	12	27.074
A0A140N9W3	Malate/L-lactate dehydrogenase OS=Escherichia coli (strain B / BL21-DE3) OX=469008 GN=ECBD_2822 PE=3 SV=1	55.4017	13	361	38.9	6.43	High		1.40717e+08	13	27.0682
A0A140NG32	Pantothenate synthetase OS=Escherichia coli (strain B / BL21-DE3) OX=469008 GN=panC PE=3 SV=1	81.9788	24	283	31.6	6.28	High		1.40656e+08	24	27.0676
A0A140N4K8	Nitrogen regulatory protein P-II OS=Escherichia coli (strain B / BL21-DE3) OX=469008 GN=ECBD_1131 PE=3 SV=1	78.5714	12	112	12.4	5.34	High		1.40531e+08	12	27.0663
A0A140NB77	Phosphoenolpyruvate synthase OS=Escherichia coli (strain B / BL21-DE3) OX=469008 GN=ECBD_1944 PE=3 SV=1	56.9444	47	792	87.3	5.03	High	Met-loss [N-Term]	1.39186e+08	47	27.0524
A0A140N6M3	Gluconokinase OS=Escherichia coli (strain B / BL21-DE3) OX=469008 GN=ECBD_0306 PE=3 SV=1	51.8519	6	162	18	6.7	High		1.3913e+08	6	27.0519
A0A140N5X0	UDP-N-acetylglucosamine 1-carboxyvinyltransferase OS=Escherichia coli (strain B / BL21-DE3) OX=469008 GN=murA PE=3 SV=1	71.599	23	419	44.8	6.16	High		1.38742e+08	23	27.0478
A0A140NCE9	Malate synthase OS=Escherichia coli (strain B / BL21-DE3) OX=469008 GN=ECBD_4023 PE=3 SV=1	51.97	21	533	60.2	5.68	High	Met-loss [N-Term]	1.38039e+08	21	27.0405
A0A140NGH9	Deoxyribose-phosphate aldolase OS=Escherichia coli (strain B / BL21-DE3) OX=469008 GN=deoC PE=3 SV=1	80.3089	20	259	27.7	5.73	High		1.37614e+08	20	27.036
A0A140NAW6	Glucose-1-phosphate thymidylyltransferase OS=Escherichia coli (strain B / BL21-DE3) OX=469008 GN=ECBD_1616 PE=3 SV=1	79.4521	19	292	32.4	5.29	High		1.37495e+08	20	27.0348
A0A140NDE0	Proline--tRNA ligase OS=Escherichia coli (strain B / BL21-DE3) OX=469008 GN=proS PE=3 SV=1	77.972	43	572	63.6	5.19	High		1.37123e+08	43	27.0309
A0A140ND61	Chaperone protein HtpG OS=Escherichia coli (strain B / BL21-DE3) OX=469008 GN=htpG PE=3 SV=1	80.2885	60	624	71.4	5.21	High		1.36957e+08	60	27.0291
A0A140NDB6	50S ribosomal protein L10 OS=Escherichia coli (strain B / BL21-DE3) OX=469008 GN=rplJ PE=3 SV=1	88.4848	19	165	17.7	8.98	High	Met-loss [N-Term]	1.36911e+08	19	27.0287
A0A140NBQ5	Short-chain dehydrogenase/reductase SDR OS=Escherichia coli (strain B / BL21-DE3) OX=469008 GN=ECBD_2026 PE=4 SV=1	61.9608	12	255	26.8	5.4	High		1.36819e+08	12	27.0277
A0A140NGF3	Molybdenum cofactor synthesis domain protein OS=Escherichia coli (strain B / BL21-DE3) OX=469008 GN=ECBD_3609 PE=4 SV=1	65.1282	11	195	21.2	5.11	High		1.36481e+08	11	27.0241
A0A140N4Y8	Protein RecA OS=Escherichia coli (strain B / BL21-DE3) OX=469008 GN=recA PE=3 SV=1	60.0567	17	353	38	5.19	High		1.35877e+08	17	27.0177
A0A140NH17	Uroporphyrinogen decarboxylase OS=Escherichia coli (strain B / BL21-DE3) OX=469008 GN=hemE PE=3 SV=1	50.565	17	354	39.2	6.3	High		1.35553e+08	17	27.0143
A0A140N5A9	Fe/S biogenesis protein NfuA OS=Escherichia coli (strain B / BL21-DE3) OX=469008 GN=nfuA PE=3 SV=1	49.2147	8	191	21	4.64	High		1.35341e+08	8	27.012
A0A140N7D6	Transcription termination/antitermination protein NusA OS=Escherichia coli (strain B / BL21-DE3) OX=469008 GN=nusA PE=3 SV=1	69.697	40	495	54.8	4.64	High		1.34857e+08	40	27.0069
A0A140NB21	Putative glucose-6-phosphate 1-epimerase OS=Escherichia coli (strain B / BL21-DE3) OX=469008 GN=ECBD_1864 PE=3 SV=1	95.5782	25	294	32.7	6.4	High		1.33812e+08	25	26.9956
A0A140NFA2	MOSC domain containing protein OS=Escherichia coli (strain B / BL21-DE3) OX=469008 GN=ECBD_4113 PE=4 SV=1	62.9464	11	224	25.3	6.06	High		1.31757e+08	11	26.9733
A0A140N8V0	dTDP-glucose 4,6-dehydratase OS=Escherichia coli (strain B / BL21-DE3) OX=469008 GN=ECBD_1614 PE=3 SV=1	93.9058	26	361	40.7	5.47	High		1.29585e+08	27	26.9493
A0A140NAF9	Lipoyl synthase OS=Escherichia coli (strain B / BL21-DE3) OX=469008 GN=lipA PE=3 SV=1	59.5016	16	321	36	7.94	High		1.29516e+08	16	26.9486
A0A140N9C3	Glucokinase OS=Escherichia coli (strain B / BL21-DE3) OX=469008 GN=glk PE=3 SV=1	72.2741	18	321	34.7	6.52	High	Met-loss [N-Term]	1.28842e+08	18	26.941
A0A140N3M3	Protease TldD OS=Escherichia coli (strain B / BL21-DE3) OX=469008 GN=ECBD_0502 PE=4 SV=1	59.6674	18	481	51.3	5.06	High		1.28455e+08	18	26.9367
A0A140N6Z1	Mannose-6-phosphate isomerase OS=Escherichia coli (strain B / BL21-DE3) OX=469008 GN=ECBD_2033 PE=3 SV=1	75.1918	22	391	42.8	5.44	High		1.27791e+08	22	26.9292
A0A140NFG5	Methionine aminopeptidase OS=Escherichia coli (strain B / BL21-DE3) OX=469008 GN=map PE=1 SV=1	93.5606	21	264	29.3	5.96	High	Met-loss [N-Term]	1.27195e+08	21	26.9225
A0A140NCA7	GTP cyclohydrolase-2 OS=Escherichia coli (strain B / BL21-DE3) OX=469008 GN=ribA PE=3 SV=1	63.2653	11	196	21.8	5.95	High		1.26774e+08	11	26.9177
A0A140N9U2	Short-chain dehydrogenase/reductase SDR OS=Escherichia coli (strain B / BL21-DE3) OX=469008 GN=ECBD_2351 PE=4 SV=1	55.9524	15	252	27.9	7.8	High		1.26655e+08	15	26.9163
A0A140NBN7	Tyrosine--tRNA ligase OS=Escherichia coli (strain B / BL21-DE3) OX=469008 GN=tyrS PE=3 SV=1	79.4811	28	424	47.5	5.81	High		1.26404e+08	28	26.9135
A0A140NC10	Citrate synthase OS=Escherichia coli (strain B / BL21-DE3) OX=469008 GN=ECBD_2941 PE=3 SV=1	88.0562	34	427	48	6.68	High		1.24952e+08	34	26.8968
A0A140N6M2	Fructosamine kinase OS=Escherichia coli (strain B / BL21-DE3) OX=469008 GN=ECBD_1920 PE=4 SV=1	82.1678	15	286	32.4	5.15	High		1.23125e+08	15	26.8756
A0A140N4G4	Glycine dehydrogenase (decarboxylating) OS=Escherichia coli (strain B / BL21-DE3) OX=469008 GN=gcvP PE=3 SV=1	82.8631	62	957	104.3	6	High	Met-loss [N-Term]	1.22838e+08	62	26.8722
A0A140N3Z1	Peptidase M16 domain protein OS=Escherichia coli (strain B / BL21-DE3) OX=469008 GN=ECBD_0212 PE=4 SV=1	66.8675	24	498	55.5	6.02	High		1.22405e+08	24	26.8671
A0A140N4F0	Beta sliding clamp OS=Escherichia coli (strain B / BL21-DE3) OX=469008 GN=ECBD_0002 PE=3 SV=1	44.5355	16	366	40.6	5.39	High		1.21965e+08	16	26.8619
A0A140N5H9	Putative N-acetylmannosamine-6-phosphate 2-epimerase OS=Escherichia coli (strain B / BL21-DE3) OX=469008 GN=nanE PE=3 SV=1	74.2358	11	229	24.1	5.05	High	Met-loss [N-Term]	1.21709e+08	11	26.8589
A0A140N6P8	NUDIX hydrolase OS=Escherichia coli (strain B / BL21-DE3) OX=469008 GN=ECBD_1223 PE=4 SV=1	49.7382	9	191	21.7	4.94	High	Met-loss [N-Term]	1.19829e+08	9	26.8364
A0A140N7V0	N-acetylmannosamine kinase OS=Escherichia coli (strain B / BL21-DE3) OX=469008 GN=nanK PE=3 SV=1	61.512	14	291	29.7	6.04	High	Met-loss [N-Term]	1.19751e+08	14	26.8355
A0A140NDV1	50S ribosomal protein L9 OS=Escherichia coli (strain B / BL21-DE3) OX=469008 GN=rplI PE=3 SV=1	83.2215	18	149	15.8	6.58	High	Met-loss [N-Term]	1.19737e+08	18	26.8353
A0A140NBE7	Formate acetyltransferase OS=Escherichia coli (strain B / BL21-DE3) OX=469008 GN=ECBD_2692 PE=4 SV=1	88.6842	63	760	85.3	6.01	High		1.18423e+08	70	26.8194
A0A140NAD5	NAD-dependent epimerase/dehydratase OS=Escherichia coli (strain B / BL21-DE3) OX=469008 GN=ECBD_1641 PE=4 SV=1	68.6131	11	274	29.7	5.47	High		1.18327e+08	11	26.8182
A0A140N7R1	Trypanothione synthase OS=Escherichia coli (strain B / BL21-DE3) OX=469008 GN=ECBD_0702 PE=4 SV=1	59.0674	17	386	45	4.77	High		1.18312e+08	17	26.818
A0A140NGE1	Fructose-1,6-bisphosphatase class 1 OS=Escherichia coli (strain B / BL21-DE3) OX=469008 GN=fbp PE=3 SV=1	62.0482	18	332	36.8	5.99	High		1.18047e+08	18	26.8148
A0A140N652	UPF0149 protein YgfB OS=Escherichia coli (strain B / BL21-DE3) OX=469008 GN=ygfB PE=3 SV=1	32.4742	4	194	21.5	4.35	High		1.17557e+08	4	26.8088
A0A140N8Q2	3-dehydroquinate dehydratase OS=Escherichia coli (strain B / BL21-DE3) OX=469008 GN=aroD PE=3 SV=1	82.1429	19	252	27.5	5.5	High		1.15836e+08	19	26.7875
A0A140N627	S-adenosylmethionine synthase OS=Escherichia coli (strain B / BL21-DE3) OX=469008 GN=metK PE=3 SV=1	83.5938	28	384	41.9	5.26	High	Met-loss [N-Term]	1.15111e+08	28	26.7784
A0A140N6S0	2-C-methyl-D-erythritol 2,4-cyclodiphosphate synthase OS=Escherichia coli (strain B / BL21-DE3) OX=469008 GN=ispF PE=3 SV=1	78.6164	8	159	16.9	6.52	High		1.14924e+08	8	26.7761
A0A140NDZ2	Thymidine phosphorylase OS=Escherichia coli (strain B / BL21-DE3) OX=469008 GN=deoA PE=3 SV=1	86.1364	29	440	47.2	5.38	High		1.14922e+08	29	26.7761
A0A140NH65	60 kDa chaperonin OS=Escherichia coli (strain B / BL21-DE3) OX=469008 GN=groL PE=3 SV=1	94.3431	69	548	57.3	4.94	High		1.14886e+08	69	26.7756
A0A140NGG7	30S ribosomal protein S6 OS=Escherichia coli (strain B / BL21-DE3) OX=469008 GN=rpsF PE=3 SV=1	91.6031	18	131	15.2	5.39	High		1.125e+08	18	26.7454
A0A140NBQ7	HAD-superfamily hydrolase, subfamily IA, variant 3 OS=Escherichia coli (strain B / BL21-DE3) OX=469008 GN=ECBD_1918 PE=4 SV=1	58.1081	11	222	24.3	4.96	High		1.12208e+08	11	26.7416
A0A140N6J0	DNA-directed RNA polymerase subunit omega OS=Escherichia coli (strain B / BL21-DE3) OX=469008 GN=rpoZ PE=3 SV=1	97.8022	14	91	10.2	4.92	High	Met-loss [N-Term]	1.1099e+08	14	26.7259
A0A140N8R4	Cell division protein ZapA OS=Escherichia coli (strain B / BL21-DE3) OX=469008 GN=zapA PE=3 SV=1	45.8716	4	109	12.6	5.25	High	Met-loss [N-Term]	1.10758e+08	4	26.7228
A0A140N7G4	50S ribosomal protein L30 OS=Escherichia coli (strain B / BL21-DE3) OX=469008 GN=rpmD PE=3 SV=1	81.3559	10	59	6.5	10.96	High		1.10644e+08	10	26.7213
A0A140ND72	ATP synthase subunit alpha OS=Escherichia coli (strain B / BL21-DE3) OX=469008 GN=atpA PE=3 SV=1	74.8538	32	513	55.2	6.13	High		1.09744e+08	33	26.7096
A0A140NFF1	Coproporphyrinogen-III oxidase OS=Escherichia coli (strain B / BL21-DE3) OX=469008 GN=ECBD_4161 PE=3 SV=1	43.5449	19	457	52.7	6.06	High	Met-loss [N-Term]	1.09724e+08	19	26.7093
A0A140N8F4	Probable phosphatase YcdX OS=Escherichia coli (strain B / BL21-DE3) OX=469008 GN=ycdX PE=3 SV=1	86.9388	15	245	26.8	6.05	High		109220425	15	26.7027
A0A140N7Z8	Dihydropteroate synthase OS=Escherichia coli (strain B / BL21-DE3) OX=469008 GN=ECBD_0565 PE=3 SV=1	73.4043	14	282	30.6	6.02	High		1.09085e+08	14	26.7009
A0A140NG76	UDP-N-acetylmuramate--L-alanine ligase OS=Escherichia coli (strain B / BL21-DE3) OX=469008 GN=murC PE=3 SV=1	45.8248	14	491	53.6	5.76	High		1.0896e+08	14	26.6992
A0A140NGP6	Mannitol dehydrogenase domain protein OS=Escherichia coli (strain B / BL21-DE3) OX=469008 GN=ECBD_3712 PE=3 SV=1	46.9136	18	486	53.5	5.52	High		1.08446e+08	19	26.6924
A0A140NBB3	Pyruvate kinase OS=Escherichia coli (strain B / BL21-DE3) OX=469008 GN=ECBD_1784 PE=3 SV=1	86.875	37	480	51.3	6.68	High		1.07525e+08	37	26.6801
A0A140NDW1	Pyruvate formate-lyase-activating enzyme OS=Escherichia coli (strain B / BL21-DE3) OX=469008 GN=ECBD_2693 PE=3 SV=1	73.9837	19	246	28.2	6.46	High		1.06654e+08	19	26.6684
A0A140NB97	Hydrolase, TatD family OS=Escherichia coli (strain B / BL21-DE3) OX=469008 GN=ECBD_2501 PE=4 SV=1	79.6226	19	265	29.8	5.41	High		1.06133e+08	19	26.6613
A0A140NEF5	Bifunctional protein FolD OS=Escherichia coli (strain B / BL21-DE3) OX=469008 GN=folD PE=3 SV=1	39.5833	9	288	31	6.09	High		1.05995e+08	9	26.6594
A0A140N934	Sulfurtransferase OS=Escherichia coli (strain B / BL21-DE3) OX=469008 GN=ECBD_1165 PE=4 SV=1	81.1388	16	281	30.8	4.69	High	Met-loss [N-Term]	1.05089e+08	16	26.647
A0A140NEL3	Oligoribonuclease OS=Escherichia coli (strain B / BL21-DE3) OX=469008 GN=orn PE=3 SV=1	85.6354	15	181	20.8	5.08	High	Met-loss [N-Term]	1.04842e+08	15	26.6436
A0A140NAZ8	Polyamine aminopropyltransferase OS=Escherichia coli (strain B / BL21-DE3) OX=469008 GN=speE PE=3 SV=1	60.0694	10	288	32.3	5.66	High		1.04545e+08	10	26.6396
A0A140N7A0	Ribonucleotide reductase OS=Escherichia coli (strain B / BL21-DE3) OX=469008 GN=ECBD_1425 PE=4 SV=1	66.2234	20	376	43.5	4.81	High	Met-loss [N-Term]	1.04256e+08	20	26.6356
A0A140NEM4	Superoxide dismutase OS=Escherichia coli (strain B / BL21-DE3) OX=469008 GN=ECBD_4115 PE=3 SV=1	66.5049	13	206	23.1	6.96	High	Met-loss [N-Term]	1.04111e+08	13	26.6335
A0A140NAQ0	Iron-sulfur cluster carrier protein OS=Escherichia coli (strain B / BL21-DE3) OX=469008 GN=ECBD_1545 PE=3 SV=1	29.5393	10	369	39.9	6.3	High		1.03769e+08	10	26.6288
A0A140N7T0	Luciferase-like monooxygenase OS=Escherichia coli (strain B / BL21-DE3) OX=469008 GN=ECBD_0580 PE=4 SV=1	57.3134	15	335	37.2	6.6	High	Met-loss [N-Term]	1.03258e+08	15	26.6217
A0A140N9H6	Uncharacterized protein OS=Escherichia coli (strain B / BL21-DE3) OX=469008 GN=ECBD_2042 PE=4 SV=1	66.242	20	314	33.9	9.28	High		1.02846e+08	20	26.6159
A0A140N6N7	Short-chain dehydrogenase/reductase SDR OS=Escherichia coli (strain B / BL21-DE3) OX=469008 GN=ECBD_1020 PE=3 SV=1	78.7645	13	259	27.8	6.33	High		1.02765e+08	13	26.6148
A0A140N6D7	Glycoside hydrolase family 1 OS=Escherichia coli (strain B / BL21-DE3) OX=469008 GN=ECBD_0836 PE=3 SV=1	74.2138	27	477	55.1	5.86	High		1.02522e+08	27	26.6114
A0A140NF71	Transcriptional regulator, TetR family OS=Escherichia coli (strain B / BL21-DE3) OX=469008 GN=ECBD_3896 PE=4 SV=1	79.0576	14	191	21.9	5.08	High		102475224	14	26.6107
A0A140N6Y5	30S ribosomal protein S10 OS=Escherichia coli (strain B / BL21-DE3) OX=469008 GN=rpsJ PE=3 SV=1	74.7573	14	103	11.7	9.69	High		1.02315e+08	14	26.6084
A0A140N4H6	Thiol:disulfide interchange protein OS=Escherichia coli (strain B / BL21-DE3) OX=469008 GN=ECBD_0844 PE=3 SV=1	45.339	10	236	25.6	6.79	High		1.01296e+08	10	26.594
A0A140NAC0	ROK family protein OS=Escherichia coli (strain B / BL21-DE3) OX=469008 GN=ECBD_3267 PE=4 SV=1	60.596	15	302	32.5	5.69	High		101158222	15	26.592
A0A140NBA5	30S ribosomal protein S1 OS=Escherichia coli (strain B / BL21-DE3) OX=469008 GN=ECBD_2684 PE=3 SV=1	86.3555	60	557	61.1	4.98	High	Met-loss [N-Term]; Met-loss+Acetyl [N-Term]	1.01085e+08	60	26.591
A0A140N771	Stringent starvation protein B OS=Escherichia coli (strain B / BL21-DE3) OX=469008 GN=ECBD_0519 PE=4 SV=1	35.1515	6	165	18.3	4.55	High		1.00971e+08	6	26.5894
A0A140N964	tRNA pseudouridine synthase D OS=Escherichia coli (strain B / BL21-DE3) OX=469008 GN=truD PE=3 SV=1	65.9026	18	349	39.1	6.57	High		100630053	18	26.5845
A0A140N9X9	Glutaredoxin OS=Escherichia coli (strain B / BL21-DE3) OX=469008 GN=ECBD_1989 PE=3 SV=1	57.3913	7	115	12.9	4.75	High		1.00543e+08	7	26.5832
A0A140NGD5	4-hydroxy-3-methylbut-2-enyl diphosphate reductase OS=Escherichia coli (strain B / BL21-DE3) OX=469008 GN=ispH PE=3 SV=1	77.5316	21	316	34.8	5.3	High		1.00435e+08	21	26.5817
A0A140NG05	UPF0325 protein YaeH OS=Escherichia coli (strain B / BL21-DE3) OX=469008 GN=yaeH PE=3 SV=1	81.25	19	128	15.1	7.18	High		1.00136e+08	19	26.5774
A0A140ND98	Isoleucine--tRNA ligase OS=Escherichia coli (strain B / BL21-DE3) OX=469008 GN=ileS PE=3 SV=1	84.5416	70	938	104.2	6.06	High	Met-loss [N-Term]	9.98055e+07	70	26.5726
A0A140N5E8	Phosphoglucosamine mutase OS=Escherichia coli (strain B / BL21-DE3) OX=469008 GN=glmM PE=3 SV=1	63.3708	23	445	47.5	6.02	High		9.88754e+07	23	26.5591
A0A140N737	UPF0304 protein YfbU OS=Escherichia coli (strain B / BL21-DE3) OX=469008 GN=yfbU PE=3 SV=1	96.9512	17	164	19.5	6.52	High		9.74409e+07	17	26.538
A0A140N6C7	PfkB domain protein OS=Escherichia coli (strain B / BL21-DE3) OX=469008 GN=ECBD_0213 PE=4 SV=1	30.4207	8	309	33.9	5.08	High		9.72065e+07	8	26.5345
A0A140N539	Dihydrofolate synthase/folylpolyglutamate synthase OS=Escherichia coli (strain B / BL21-DE3) OX=469008 GN=ECBD_1344 PE=3 SV=1	54.5024	17	422	45.4	5.8	High		9.6909e+07	17	26.5301
A0A140NBF2	PTS system, mannose/fructose/sorbose family, IIA subunit OS=Escherichia coli (strain B / BL21-DE3) OX=469008 GN=ECBD_1824 PE=4 SV=1	71.517	21	323	35	6.02	High	Met-loss [N-Term]	9.66855e+07	21	26.5268
A0A140NG09	Threonine synthase OS=Escherichia coli (strain B / BL21-DE3) OX=469008 GN=ECBD_3614 PE=4 SV=1	71.729	26	428	47.1	5.4	High		9.65128e+07	26	26.5242
A0A140NCW6	Orotidine 5'-phosphate decarboxylase OS=Escherichia coli (strain B / BL21-DE3) OX=469008 GN=pyrF PE=3 SV=1	51.6981	13	265	28.5	6.54	High		9.61709e+07	13	26.5191
A0A140N394	Two component transcriptional regulator, winged helix family OS=Escherichia coli (strain B / BL21-DE3) OX=469008 GN=ECBD_0340 PE=4 SV=1	82.8452	19	239	27.4	6.83	High		9.61336e+07	19	26.5185
A0A140N9H2	D-serine dehydratase OS=Escherichia coli (strain B / BL21-DE3) OX=469008 GN=dsdA PE=3 SV=1	63.3484	21	442	47.8	5.91	High		9.60363e+07	21	26.5171
A0A140N7N2	Methionyl-tRNA formyltransferase OS=Escherichia coli (strain B / BL21-DE3) OX=469008 GN=fmt PE=3 SV=1	60.3175	13	315	34.1	5.76	High		9.59891e+07	13	26.5164
A0A140N953	YecA family protein OS=Escherichia coli (strain B / BL21-DE3) OX=469008 GN=ECBD_1732 PE=3 SV=1	33.9367	5	221	25	4.59	High		9.58739e+07	5	26.5146
A0A140NE26	Site-specific DNA-methyltransferase (Adenine-specific) OS=Escherichia coli (strain B / BL21-DE3) OX=469008 GN=ECBD_3681 PE=4 SV=1	40.2647	14	529	59.2	5.21	High		9.38595e+07	14	26.484
A0A140NBM7	Leucine--tRNA ligase OS=Escherichia coli (strain B / BL21-DE3) OX=469008 GN=leuS PE=3 SV=1	69.3023	58	860	97.2	5.24	High		9.38046e+07	58	26.4832
A0A140NAB9	Acetyltransferase OS=Escherichia coli (strain B / BL21-DE3) OX=469008 GN=ECBD_1620 PE=4 SV=1	41.6667	5	192	20.6	5.08	High	Met-loss [N-Term]	9.37533e+07	5	26.4824
A0A140NHS0	ATP synthase subunit beta OS=Escherichia coli (strain B / BL21-DE3) OX=469008 GN=atpD PE=3 SV=1	93.4783	36	460	50.3	5.01	High		9.28562e+07	36	26.4685
A0A140N6T9	Pyridoxine/pyridoxal/pyridoxamine kinase OS=Escherichia coli (strain B / BL21-DE3) OX=469008 GN=pdxK PE=3 SV=1	54.7703	10	283	30.8	5.34	High		9.26787e+07	10	26.4657
A0A140N583	Bifunctional protein HldE OS=Escherichia coli (strain B / BL21-DE3) OX=469008 GN=hldE PE=3 SV=1	67.9245	27	477	51	5.41	High		9.25009e+07	27	26.463
A0A140N2T1	50S ribosomal protein L6 OS=Escherichia coli (strain B / BL21-DE3) OX=469008 GN=rplF PE=3 SV=1	81.9209	16	177	18.9	9.7	High		9.2426e+07	16	26.4618
A0A140NEV5	Alkyl hydroperoxide reductase, F subunit OS=Escherichia coli (strain B / BL21-DE3) OX=469008 GN=ECBD_3046 PE=3 SV=1	67.2316	29	531	57.4	5.69	High		9.18895e+07	29	26.4534
A0A140N645	Ecotin OS=Escherichia coli (strain B / BL21-DE3) OX=469008 GN=eco PE=3 SV=1	70.9877	13	162	18.2	7.12	High		8.99708e+07	13	26.423
A0A140N929	Transcriptional regulator, IclR family OS=Escherichia coli (strain B / BL21-DE3) OX=469008 GN=ECBD_1813 PE=4 SV=1	79.0875	22	263	30	5.58	High	Met-loss [N-Term]; Met-loss+Acetyl [N-Term]	8.99617e+07	22	26.4228
A0A140NDJ4	Ribosomal protein S12 methylthiotransferase RimO OS=Escherichia coli (strain B / BL21-DE3) OX=469008 GN=rimO PE=3 SV=1	54.195	15	441	49.6	5.48	High		8.97537e+07	16	26.4195
A0A140N5E1	Ribulose-phosphate 3-epimerase OS=Escherichia coli (strain B / BL21-DE3) OX=469008 GN=ECBD_0361 PE=3 SV=1	66.6667	11	225	24.5	5.31	High	Met-loss [N-Term]	8.95365e+07	11	26.416
A0A140NC00	Oxidoreductase domain protein OS=Escherichia coli (strain B / BL21-DE3) OX=469008 GN=ECBD_2021 PE=4 SV=1	65.6069	16	346	38.2	5.78	High		8.93004e+07	16	26.4122
A0A140N8S5	Protein GrpE OS=Escherichia coli (strain B / BL21-DE3) OX=469008 GN=grpE PE=3 SV=1	87.3096	21	197	21.8	4.75	High		8.90334e+07	21	26.4078
A0A140NBV7	Translation initiation factor IF-1 OS=Escherichia coli (strain B / BL21-DE3) OX=469008 GN=infA PE=3 SV=1	79.1667	5	72	8.2	9.25	High	Met-loss [N-Term]	8.56152e+07	5	26.3514
A0A140N9V8	Pyruvate kinase OS=Escherichia coli (strain B / BL21-DE3) OX=469008 GN=ECBD_1969 PE=3 SV=1	78.2979	40	470	50.7	6.09	High		8.54048e+07	40	26.3478
A0A140N8B9	dTDP-4-dehydrorhamnose 3,5-epimerase OS=Escherichia coli (strain B / BL21-DE3) OX=469008 GN=ECBD_1617 PE=3 SV=1	70.1657	12	181	21.1	7.49	High		85273365	12	26.3456
A0A140N457	Guanylate kinase OS=Escherichia coli (strain B / BL21-DE3) OX=469008 GN=gmk PE=3 SV=1	39.6135	8	207	23.6	6.54	High	Met-loss [N-Term]	8.5103e+07	8	26.3427
A0A140N3F8	3,4-dihydroxy-2-butanone 4-phosphate synthase OS=Escherichia coli (strain B / BL21-DE3) OX=469008 GN=ribB PE=3 SV=1	74.1935	10	217	23.3	5.01	High	Met-loss [N-Term]	8.41189e+07	10	26.3259
A0A140NE27	Acetyltransferase component of pyruvate dehydrogenase complex OS=Escherichia coli (strain B / BL21-DE3) OX=469008 GN=ECBD_3504 PE=3 SV=1	80.1587	62	630	66.1	5.17	High	Met-loss [N-Term]	8.37217e+07	62	26.3191
A0A140NES2	7-cyano-7-deazaguanine synthase OS=Escherichia coli (strain B / BL21-DE3) OX=469008 GN=queC PE=3 SV=1	76.6234	12	231	25.5	6.06	High		8.27447e+07	12	26.3022
A0A140N7Y8	Trans-hexaprenyltranstransferase OS=Escherichia coli (strain B / BL21-DE3) OX=469008 GN=ECBD_0555 PE=3 SV=1	49.5356	10	323	35.2	4.81	High		80700524	10	26.2661
A0A140NDD0	Thymidylate kinase OS=Escherichia coli (strain B / BL21-DE3) OX=469008 GN=tmk PE=3 SV=1	75.1174	14	213	23.8	5.52	High		7.95294e+07	14	26.245
A0A140N8V2	Site-determining protein OS=Escherichia coli (strain B / BL21-DE3) OX=469008 GN=ECBD_2447 PE=3 SV=1	68.5185	21	270	29.6	5.38	High		7.93282e+07	21	26.2413
A0A140NA26	Lipopolysaccharide core heptose(II)-phosphate phosphatase OS=Escherichia coli (strain B / BL21-DE3) OX=469008 GN=ais PE=3 SV=1	62.5	11	200	22.2	9.17	High		7.92863e+07	11	26.2406
A0A140N6T1	N-acetylmuramic acid 6-phosphate etherase OS=Escherichia coli (strain B / BL21-DE3) OX=469008 GN=murQ PE=2 SV=1	66.443	13	298	31.2	5.95	High		7.86473e+07	13	26.2289
A0A140N666	Aminotransferase class I and II OS=Escherichia coli (strain B / BL21-DE3) OX=469008 GN=ECBD_0162 PE=4 SV=1	28.0576	11	417	46.7	5.69	High	Met-loss [N-Term]	7.75228e+07	11	26.2081
A0A140NA29	Alanine racemase OS=Escherichia coli (strain B / BL21-DE3) OX=469008 GN=ECBD_2432 PE=3 SV=1	60.3933	15	356	38.8	7.05	High	Met-loss [N-Term]	7.67819e+07	15	26.1943
A0A140NBS9	UPF0307 protein YjgA OS=Escherichia coli (strain B / BL21-DE3) OX=469008 GN=yjgA PE=3 SV=1	57.377	11	183	21.3	5.45	High	Met-loss [N-Term]	7.61664e+07	11	26.1827
A0A140N5J7	3-deoxy-D-manno-octulosonate 8-phosphate phosphatase KdsC OS=Escherichia coli (strain B / BL21-DE3) OX=469008 GN=ECBD_0544 PE=3 SV=1	59.5745	7	188	20	5.11	High		7.61337e+07	7	26.182
A0A140NBG9	Pyridoxal kinase PdxY OS=Escherichia coli (strain B / BL21-DE3) OX=469008 GN=pdxY PE=3 SV=1	83.2168	13	286	31.2	6.52	High		7.55136e+07	13	26.1702
A0A140NDL0	Pyruvate dehydrogenase E1 component OS=Escherichia coli (strain B / BL21-DE3) OX=469008 GN=ECBD_3505 PE=4 SV=1	87.1477	89	887	99.6	5.68	High	Met-loss [N-Term]; Met-loss+Acetyl [N-Term]	7.52377e+07	89	26.165
A0A140NF15	Isocitrate lyase OS=Escherichia coli (strain B / BL21-DE3) OX=469008 GN=ECBD_4022 PE=4 SV=1	79.2627	27	434	47.5	5.31	High		7.51813e+07	27	26.1639
A0A140N3T1	Peptidase M24 OS=Escherichia coli (strain B / BL21-DE3) OX=469008 GN=ECBD_0829 PE=4 SV=1	67.3469	26	441	49.8	5.34	High	Met-loss [N-Term]	74785129	26	26.1562
A0A140N8D9	NADPH-dependent 7-cyano-7-deazaguanine reductase OS=Escherichia coli (strain B / BL21-DE3) OX=469008 GN=queF PE=3 SV=1	55.6738	15	282	32.6	6.13	High	Met-loss [N-Term]	7.46461e+07	15	26.1536
A0A140NG68	Cell division protein ZapD OS=Escherichia coli (strain B / BL21-DE3) OX=469008 GN=zapD PE=3 SV=1	53.4413	12	247	28.3	6.79	High		7.37031e+07	12	26.1352
A0A140NEW8	ATP-dependent Clp protease proteolytic subunit OS=Escherichia coli (strain B / BL21-DE3) OX=469008 GN=clpP PE=3 SV=1	53.6232	8	207	23.2	5.8	High		7.35042e+07	8	26.1313
A0A140NAQ9	Carboxy-S-adenosyl-L-methionine synthase OS=Escherichia coli (strain B / BL21-DE3) OX=469008 GN=cmoA PE=3 SV=1	53.0364	10	247	27.8	5.77	High		7.27379e+07	10	26.1162
A0A140NC86	Transporter-associated region OS=Escherichia coli (strain B / BL21-DE3) OX=469008 GN=ECBD_2993 PE=4 SV=1	63.6986	16	292	33.3	4.7	High	Met-loss+Acetyl [N-Term]	7.24261e+07	16	26.11
A0A140N8E6	Protein-N(Pi)-phosphohistidine--sugar phosphotransferase OS=Escherichia coli (strain B / BL21-DE3) OX=469008 GN=ECBD_1564 PE=4 SV=1	96.8085	9	94	10.3	6.27	High		7.03519e+07	9	26.0681
A0A140N850	NAD(P)H dehydrogenase (Quinone) OS=Escherichia coli (strain B / BL21-DE3) OX=469008 GN=ECBD_0711 PE=4 SV=1	59.0674	11	193	21.9	6.29	High	Met-loss [N-Term]	7.01637e+07	11	26.0642
A0A140N498	Malate synthase G OS=Escherichia coli (strain B / BL21-DE3) OX=469008 GN=glcB PE=3 SV=1	46.1964	24	723	80.4	6.18	High		6.91324e+07	24	26.0429
A0A140NBZ7	FMN-dependent NADH-azoreductase OS=Escherichia coli (strain B / BL21-DE3) OX=469008 GN=azoR PE=3 SV=1	58.209	7	201	21.6	4.97	High		6.89621e+07	7	26.0393
A0A140NBL6	Molybdenum cofactor synthesis domain protein OS=Escherichia coli (strain B / BL21-DE3) OX=469008 GN=ECBD_2796 PE=4 SV=1	77.3723	19	411	44.1	5.21	High		6.8573e+07	19	26.0311
A0A140N6M4	ADP-L-glycero-D-manno-heptose-6-epimerase OS=Escherichia coli (strain B / BL21-DE3) OX=469008 GN=hldD PE=3 SV=1	73.2258	27	310	34.9	4.93	High		6.83091e+07	27	26.0256
A0A140NB73	Trehalose-6-phosphate synthase OS=Escherichia coli (strain B / BL21-DE3) OX=469008 GN=ECBD_1744 PE=3 SV=1	34.8101	12	474	53.6	6.86	High		6.81856e+07	12	26.023
A0A140NI72	Ketol-acid reductoisomerase (NADP(+)) OS=Escherichia coli (strain B / BL21-DE3) OX=469008 GN=ilvC PE=3 SV=1	75.3564	41	491	54	5.31	High	Met-loss [N-Term]	6.81476e+07	41	26.0222
A0A140N688	dITP/XTP pyrophosphatase OS=Escherichia coli (strain B / BL21-DE3) OX=469008 GN=ECBD_0786 PE=3 SV=1	31.9797	6	197	21	5.41	High		6.80136e+07	6	26.0193
A0A140NCN7	Probable septum site-determining protein MinC OS=Escherichia coli (strain B / BL21-DE3) OX=469008 GN=minC PE=3 SV=1	59.3074	14	231	24.8	6.87	High	Met-loss [N-Term]	6.74926e+07	14	26.0082
A0A140N9S7	Anaerobic glycerol-3-phosphate dehydrogenase subunit B OS=Escherichia coli (strain B / BL21-DE3) OX=469008 GN=glpB PE=3 SV=1	44.3914	13	419	45.3	6.07	High		6.74265e+07	13	26.0068
A0A140NBN5	3-hydroxydecanoyl-[acyl-carrier-protein] dehydratase OS=Escherichia coli (strain B / BL21-DE3) OX=469008 GN=fabA PE=3 SV=1	50.5814	13	172	19	6.57	High		6.72534e+07	13	26.0031
A0A140NGV6	Valine--tRNA ligase OS=Escherichia coli (strain B / BL21-DE3) OX=469008 GN=valS PE=3 SV=1	67.8233	67	951	108.1	5.34	High		66793039	67	25.9932
A0A140N9Q3	GMP synthase [glutamine-hydrolyzing] OS=Escherichia coli (strain B / BL21-DE3) OX=469008 GN=guaA PE=3 SV=1	87.2381	37	525	58.6	5.39	High		6.67749e+07	37	25.9928
A0A140NHE6	Alanine racemase OS=Escherichia coli (strain B / BL21-DE3) OX=469008 GN=ECBD_3980 PE=3 SV=1	54.8747	14	359	39.1	7.05	High		6.66383e+07	14	25.9898
A0A140N6L4	Imidazole glycerol phosphate synthase subunit HisF OS=Escherichia coli (strain B / BL21-DE3) OX=469008 GN=hisF PE=3 SV=1	75.969	17	258	28.5	5.12	High		6.66196e+07	17	25.9894
A0A140NDS1	Molybdenum cofactor biosynthesis protein B OS=Escherichia coli (strain B / BL21-DE3) OX=469008 GN=ECBD_2841 PE=3 SV=1	63.5294	9	170	18.6	5.8	High	Met-loss [N-Term]	6.62894e+07	9	25.9823
A0A140ND38	L-threonine dehydratase OS=Escherichia coli (strain B / BL21-DE3) OX=469008 GN=ilvA PE=3 SV=1	49.3204	19	515	56.3	5.88	High		6.59341e+07	19	25.9745
A0A140SS53	Peptidase E OS=Escherichia coli (strain B / BL21-DE3) OX=469008 GN=pepE PE=3 SV=1	85.1528	12	229	24.6	6.02	High		6.54649e+07	12	25.9642
A0A140N6W2	Anhydro-N-acetylmuramic acid kinase OS=Escherichia coli (strain B / BL21-DE3) OX=469008 GN=anmK PE=3 SV=1	43.0894	10	369	39.5	6.28	High		6.47146e+07	10	25.9476
A0A140N813	Agmatinase OS=Escherichia coli (strain B / BL21-DE3) OX=469008 GN=speB PE=3 SV=1	48.0392	9	306	33.5	5.39	High	Met-loss [N-Term]; Met-loss+Acetyl [N-Term]	64465800	9	25.942
A0A140NCZ8	S-adenosylmethionine decarboxylase proenzyme OS=Escherichia coli (strain B / BL21-DE3) OX=469008 GN=speD PE=3 SV=1	64.3939	10	264	30.4	5.39	High		6.43437e+07	10	25.9393
A0A140NFI2	Transcriptional antiterminator, Rof OS=Escherichia coli (strain B / BL21-DE3) OX=469008 GN=ECBD_3430 PE=4 SV=1	44.186	5	86	9.7	4.74	High		6.42804e+07	5	25.9379
A0A140N996	Aspartate--tRNA ligase OS=Escherichia coli (strain B / BL21-DE3) OX=469008 GN=aspS PE=3 SV=1	94.0678	61	590	65.9	5.69	High		6.30286e+07	61	25.9095
A0A140N655	Glycine betaine/L-proline ABC transporter, ATPase subunit OS=Escherichia coli (strain B / BL21-DE3) OX=469008 GN=ECBD_1042 PE=4 SV=1	1.5	1	400	44.1	5.57	High		6.21439e+07	1	25.8891
A0A140ND88	3-phosphoshikimate 1-carboxyvinyltransferase OS=Escherichia coli (strain B / BL21-DE3) OX=469008 GN=aroA PE=3 SV=1	63.2319	22	427	46.1	5.59	High	Met-loss [N-Term]	6.20238e+07	22	25.8863
A0A140NCG8	Uncharacterized protein OS=Escherichia coli (strain B / BL21-DE3) OX=469008 GN=ECBD_2193 PE=4 SV=1	53.2468	3	77	8.8	5.97	High	Met-loss [N-Term]	61933339	3	25.8842
A0A140NEC9	Homoserine O-succinyltransferase OS=Escherichia coli (strain B / BL21-DE3) OX=469008 GN=metAS PE=3 SV=1	41.7476	9	309	35.7	5.22	High	Met-loss [N-Term]	6.18143e+07	9	25.8814
A0A140N4L0	50S ribosomal protein L18 OS=Escherichia coli (strain B / BL21-DE3) OX=469008 GN=rplR PE=3 SV=1	67.5214	11	117	12.8	10.42	High		6.1467e+07	11	25.8733
A0A140N7U3	YCII-related OS=Escherichia coli (strain B / BL21-DE3) OX=469008 GN=ECBD_2371 PE=4 SV=1	96.9388	7	98	10.6	5.39	High		6.06808e+07	7	25.8547
A0A140N8N2	Ferritin OS=Escherichia coli (strain B / BL21-DE3) OX=469008 GN=ECBD_1735 PE=3 SV=1	78.1818	11	165	19.4	4.83	High	Met-loss [N-Term]	6.06425e+07	11	25.8538
A0A140SS67	Phosphoenolpyruvate carboxylase OS=Escherichia coli (strain B / BL21-DE3) OX=469008 GN=ppc PE=3 SV=1	71.6874	70	883	99	5.68	High	Met-loss [N-Term]	6.05736e+07	70	25.8522
A0A140NF10	Dihydroxy-acid dehydratase OS=Escherichia coli (strain B / BL21-DE3) OX=469008 GN=ilvD PE=3 SV=1	57.6299	29	616	65.5	6.01	High		6.05386e+07	29	25.8514
A0A140N793	Chaperone protein HscA OS=Escherichia coli (strain B / BL21-DE3) OX=469008 GN=hscA PE=3 SV=1	60.0649	26	616	65.6	5.2	High	Met-loss [N-Term]; Met-loss+Acetyl [N-Term]	6.04321e+07	26	25.8488
A0A140NEY7	Polyprenyl synthetase OS=Escherichia coli (strain B / BL21-DE3) OX=469008 GN=ECBD_3240 PE=3 SV=1	54.8495	9	299	32.1	5.54	High		6.03777e+07	9	25.8475
A0A140N8D8	Histidinol-phosphate aminotransferase OS=Escherichia coli (strain B / BL21-DE3) OX=469008 GN=hisC PE=3 SV=1	44.382	14	356	39.4	5.08	High	Met-loss [N-Term]	6.03697e+07	14	25.8473
A0A140NC46	N-acetylglucosamine-6-phosphate deacetylase OS=Escherichia coli (strain B / BL21-DE3) OX=469008 GN=ECBD_2985 PE=3 SV=1	63.3508	15	382	41	5.97	High		6.01139e+07	15	25.8412
A0A140NAF5	AMP nucleosidase OS=Escherichia coli (strain B / BL21-DE3) OX=469008 GN=amn PE=3 SV=1	73.3471	28	484	54	6.34	High		6.00166e+07	28	25.8389
A0A140N5A3	50S ribosomal protein L5 OS=Escherichia coli (strain B / BL21-DE3) OX=469008 GN=rplE PE=3 SV=1	89.3855	25	179	20.3	9.48	High	Met-loss [N-Term]	6.00135e+07	25	25.8388
A0A140NBM8	Aldo/keto reductase OS=Escherichia coli (strain B / BL21-DE3) OX=469008 GN=ECBD_1996 PE=4 SV=1	48.6577	12	298	33.7	6.18	High		5.96302e+07	12	25.8295
A0A140NDE1	Uncharacterized protein OS=Escherichia coli (strain B / BL21-DE3) OX=469008 GN=ECBD_2513 PE=4 SV=1	31.2139	6	173	19.3	4.55	High		5.88286e+07	6	25.81
A0A140N7H3	Transcriptional regulator, MerR family OS=Escherichia coli (strain B / BL21-DE3) OX=469008 GN=ECBD_0459 PE=4 SV=1	58.156	6	141	16.2	6.38	High		5.86982e+07	7	25.8068
A0A140NBG7	Fumarate hydratase class II OS=Escherichia coli (strain B / BL21-DE3) OX=469008 GN=fumC PE=3 SV=1	80.7281	32	467	50.5	6.58	High		5.84528e+07	32	25.8008
A0A140N9H1	Beta-barrel assembly-enhancing protease OS=Escherichia coli (strain B / BL21-DE3) OX=469008 GN=bepA PE=3 SV=1	50.1027	17	487	53.9	7.68	High		5.79605e+07	17	25.7886
A0A140NDM4	UPF0145 protein YbjQ OS=Escherichia coli (strain B / BL21-DE3) OX=469008 GN=ybjQ PE=3 SV=1	17.757	2	107	11.4	4.97	High		5.79055e+07	2	25.7872
A0A140NEQ0	ATP-dependent Clp protease ATP-binding subunit ClpX OS=Escherichia coli (strain B / BL21-DE3) OX=469008 GN=clpX PE=3 SV=1	70.283	27	424	46.3	5.35	High		5.76385e+07	27	25.7805
A0A140NCI3	Phage shock protein A, PspA OS=Escherichia coli (strain B / BL21-DE3) OX=469008 GN=ECBD_2313 PE=4 SV=1	64.8649	14	222	25.5	5.49	High		5.75852e+07	14	25.7792
A0A140NHQ8	ATP-dependent protease subunit HslV OS=Escherichia coli (strain B / BL21-DE3) OX=469008 GN=hslV PE=2 SV=1	60.7955	9	176	19.1	6.39	High	Met-loss [N-Term]	5.67917e+07	9	25.7592
A0A140NE35	GMP reductase OS=Escherichia coli (strain B / BL21-DE3) OX=469008 GN=guaC PE=3 SV=1	58.5014	15	347	37.4	6.54	High		5.63705e+07	15	25.7484
A0A140N969	Phospho-2-dehydro-3-deoxyheptonate aldolase OS=Escherichia coli (strain B / BL21-DE3) OX=469008 GN=ECBD_1941 PE=3 SV=1	44.8276	13	348	38.7	6.9	High		5.59979e+07	13	25.7389
A0A140N7E6	Threonine--tRNA ligase OS=Escherichia coli (strain B / BL21-DE3) OX=469008 GN=thrS PE=3 SV=1	77.5701	49	642	74	6.19	High	Met-loss [N-Term]	5.57245e+07	49	25.7318
A0A140NAM6	Uncharacterized protein OS=Escherichia coli (strain B / BL21-DE3) OX=469008 GN=ECBD_1738 PE=4 SV=1	75.9036	4	83	9.1	5.05	High	Met-loss [N-Term]	5.5628e+07	4	25.7293
A0A140N556	Peptide deformylase OS=Escherichia coli (strain B / BL21-DE3) OX=469008 GN=def PE=1 SV=1	85.7988	11	169	19.3	5.35	High	Met-loss [N-Term]; Met-loss+Acetyl [N-Term]	5.56071e+07	11	25.7288
A0A140NEK5	Cobalamin synthesis protein P47K OS=Escherichia coli (strain B / BL21-DE3) OX=469008 GN=ECBD_3678 PE=4 SV=1	69.4969	15	318	35.7	4.92	High		5.54293e+07	15	25.7241
A0A140NDZ9	Succinate dehydrogenase iron-sulfur subunit OS=Escherichia coli (strain B / BL21-DE3) OX=469008 GN=ECBD_2936 PE=3 SV=1	72.6891	16	238	26.7	7.14	High		5.53023e+07	16	25.7208
A0A140N784	3-dehydroquinate synthase OS=Escherichia coli (strain B / BL21-DE3) OX=469008 GN=aroB PE=3 SV=1	45.8564	13	362	38.8	6.05	High		5.51456e+07	13	25.7167
A0A140NBE2	N-methyl-L-tryptophan oxidase OS=Escherichia coli (strain B / BL21-DE3) OX=469008 GN=solA PE=3 SV=1	55.6452	20	372	40.9	5.36	High		5.4586e+07	20	25.702
A0A140N5B7	Iron-binding protein IscA OS=Escherichia coli (strain B / BL21-DE3) OX=469008 GN=iscA PE=3 SV=1	81.3084	9	107	11.5	4.88	High	Met-loss [N-Term]	5.40771e+07	9	25.6885
A0A140NF92	Universal stress protein OS=Escherichia coli (strain B / BL21-DE3) OX=469008 GN=ECBD_4101 PE=3 SV=1	82.3944	9	142	16.3	6.87	High		5.39583e+07	9	25.6853
A0A140N7C5	Transcription elongation factor GreA OS=Escherichia coli (strain B / BL21-DE3) OX=469008 GN=greA PE=3 SV=1	89.2405	14	158	17.6	4.79	High	Met-loss [N-Term]	5.37429e+07	14	25.6796
A0A140NHP0	Branched-chain-amino-acid aminotransferase OS=Escherichia coli (strain B / BL21-DE3) OX=469008 GN=ilvE PE=3 SV=1	53.0744	16	309	34.1	5.82	High		5.27723e+07	16	25.6533
A0A140NF56	NADPH-dependent FMN reductase OS=Escherichia coli (strain B / BL21-DE3) OX=469008 GN=ECBD_4319 PE=4 SV=1	63.2979	6	188	20.4	5.15	High		5.25962e+07	6	25.6485
A0A140NCV4	S-adenosylmethionine:tRNA ribosyltransferase-isomerase OS=Escherichia coli (strain B / BL21-DE3) OX=469008 GN=queA PE=3 SV=1	63.764	13	356	39.4	5.24	High		5.2234e+07	13	25.6385
A0A140NAY6	Cytoplasmic chaperone TorD family protein OS=Escherichia coli (strain B / BL21-DE3) OX=469008 GN=ECBD_2564 PE=4 SV=1	63.587	9	184	20.7	4.26	High		5.22118e+07	9	25.6379
A0A140N825	5-carboxymethyl-2-hydroxymuconate Delta-isomerase OS=Escherichia coli (strain B / BL21-DE3) OX=469008 GN=ECBD_2442 PE=4 SV=1	87.2146	11	219	23.7	6.33	High		5.21859e+07	11	25.6372
A0A140N5H6	Biosynthetic arginine decarboxylase OS=Escherichia coli (strain B / BL21-DE3) OX=469008 GN=speA PE=3 SV=1	63.2219	33	658	73.9	4.94	High	Met-loss [N-Term]; Met-loss+Acetyl [N-Term]	52140028	33	25.6359
A0A140N3A3	NUDIX hydrolase OS=Escherichia coli (strain B / BL21-DE3) OX=469008 GN=ECBD_0350 PE=4 SV=1	77.957	10	186	21.1	4.92	High		5.15e+07	10	25.6181
A0A140NFM7	50S ribosomal protein L1 OS=Escherichia coli (strain B / BL21-DE3) OX=469008 GN=rplA PE=3 SV=1	82.906	25	234	24.7	9.64	High		5.14525e+07	25	25.6167
A0A140NEX7	Periplasmic binding protein/LacI transcriptional regulator OS=Escherichia coli (strain B / BL21-DE3) OX=469008 GN=ECBD_3806 PE=4 SV=1	62.2642	18	318	34.3	7.14	High		5.12492e+07	18	25.611
A0A140N7T1	Succinyl-diaminopimelate desuccinylase OS=Escherichia coli (strain B / BL21-DE3) OX=469008 GN=dapE PE=3 SV=1	55.7333	14	375	41.2	5.52	High	Met-loss [N-Term]	5.10554e+07	14	25.6056
A0A140NCL5	Periplasmic trehalase OS=Escherichia coli (strain B / BL21-DE3) OX=469008 GN=treA PE=3 SV=1	44.4248	17	565	63.6	5.9	High		5.0977e+07	17	25.6033
A0A140NDC1	UPF0227 protein YcfP OS=Escherichia coli (strain B / BL21-DE3) OX=469008 GN=ycfP PE=3 SV=1	83.3333	14	180	21.2	6.61	High		5.0942e+07	14	25.6024
A0A140NHM2	dTDP-4-amino-4,6-dideoxygalactose transaminase OS=Escherichia coli (strain B / BL21-DE3) OX=469008 GN=wecE PE=3 SV=1	50	12	376	41.9	6.14	High		5.06439e+07	12	25.5939
A0A140N711	50S ribosomal protein L15 OS=Escherichia coli (strain B / BL21-DE3) OX=469008 GN=rplO PE=3 SV=1	74.3056	15	144	15	11.18	High		5.05913e+07	15	25.5924
A0A140N8L0	FAD-dependent pyridine nucleotide-disulphide oxidoreductase OS=Escherichia coli (strain B / BL21-DE3) OX=469008 GN=ECBD_1512 PE=4 SV=1	63.5922	24	412	44.3	5.4	High		5.03716e+07	24	25.5861
A0A140NF01	Transcription termination factor Rho OS=Escherichia coli (strain B / BL21-DE3) OX=469008 GN=rho PE=3 SV=1	77.5656	40	419	47	7.25	High		5.01467e+07	40	25.5797
A0A140NA96	DJ-1 family protein OS=Escherichia coli (strain B / BL21-DE3) OX=469008 GN=ECBD_3237 PE=4 SV=1	88.7755	13	196	20.8	5.38	High	Met-loss [N-Term]	5.01321e+07	13	25.5792
A0A140N5L7	50S ribosomal protein L24 OS=Escherichia coli (strain B / BL21-DE3) OX=469008 GN=rplX PE=3 SV=1	80.7692	14	104	11.3	10.21	High		5.01062e+07	14	25.5785
A0A140N2X4	Ribosomal protein L11 methyltransferase OS=Escherichia coli (strain B / BL21-DE3) OX=469008 GN=prmA PE=3 SV=1	39.5904	8	293	31.9	4.48	High	Met-loss [N-Term]	4.99478e+07	8	25.5739
A0A140N4M5	Inositol-1-monophosphatase OS=Escherichia coli (strain B / BL21-DE3) OX=469008 GN=ECBD_1151 PE=3 SV=1	81.6479	20	267	29.2	6.96	High	Met-loss [N-Term]	4.99303e+07	20	25.5734
A0A140NBP9	Short-chain dehydrogenase/reductase SDR OS=Escherichia coli (strain B / BL21-DE3) OX=469008 GN=ECBD_3770 PE=3 SV=1	51.9685	11	254	27.5	6.34	High		4.97941e+07	11	25.5695
A0A140SS71	50S ribosomal protein L31 OS=Escherichia coli (strain B / BL21-DE3) OX=469008 GN=rpmE PE=3 SV=1	85.7143	7	70	7.9	9.32	High		4.9156e+07	7	25.5509
A0A140NEJ4	Met repressor OS=Escherichia coli (strain B / BL21-DE3) OX=469008 GN=metJ PE=3 SV=1	74.2857	9	105	12.1	5.54	High	Met-loss [N-Term]	4.91116e+07	9	25.5496
A0A140N3G7	50S ribosomal protein L3 OS=Escherichia coli (strain B / BL21-DE3) OX=469008 GN=rplC PE=3 SV=1	68.4211	16	209	22.2	9.91	High	Met-loss [N-Term]	4.88497e+07	16	25.5418
A0A140N6V3	NADH:flavin oxidoreductase/NADH oxidase OS=Escherichia coli (strain B / BL21-DE3) OX=469008 GN=ECBD_1993 PE=4 SV=1	89.863	26	365	39.5	6.2	High		4.87587e+07	26	25.5392
A0A140N679	Phosphofructokinase OS=Escherichia coli (strain B / BL21-DE3) OX=469008 GN=ECBD_1490 PE=3 SV=1	59.2949	11	312	33.7	5.54	High		4.84682e+07	11	25.5305
A0A140NDE9	MOSC domain containing protein OS=Escherichia coli (strain B / BL21-DE3) OX=469008 GN=ECBD_2648 PE=4 SV=1	65.0407	15	369	40.6	7.65	High		4.83198e+07	15	25.5261
A0A140NBK3	Flavodoxin OS=Escherichia coli (strain B / BL21-DE3) OX=469008 GN=ECBD_2977 PE=3 SV=1	71.5909	11	176	19.7	4.39	High	Met-loss [N-Term]; Met-loss+Acetyl [N-Term]	4.78696e+07	11	25.5126
A0A140N4M0	50S ribosomal protein L17 OS=Escherichia coli (strain B / BL21-DE3) OX=469008 GN=rplQ PE=3 SV=1	52.7559	9	127	14.4	11.05	High		4.77915e+07	9	25.5103
A0A140N893	D-isomer specific 2-hydroxyacid dehydrogenase NAD-binding OS=Escherichia coli (strain B / BL21-DE3) OX=469008 GN=ECBD_2243 PE=1 SV=1	47.1125	15	329	36.5	5.44	High		4.75573e+07	15	25.5032
A0A140N6J6	Histidine--tRNA ligase OS=Escherichia coli (strain B / BL21-DE3) OX=469008 GN=hisS PE=3 SV=1	80.8962	34	424	47	5.91	High		4.73937e+07	34	25.4982
A0A140N7W3	UPF0265 protein YeeX OS=Escherichia coli (strain B / BL21-DE3) OX=469008 GN=yeeX PE=3 SV=1	52.2936	5	109	12.8	9.31	High	Met-loss [N-Term]; Acetyl [N-Term]	4.71648e+07	5	25.4912
A0A140N534	Phosphoglycolate phosphatase OS=Escherichia coli (strain B / BL21-DE3) OX=469008 GN=gph PE=3 SV=1	56.3492	11	252	27.4	4.72	High		4.71251e+07	11	25.49
A0A140NCP4	Transcription-repair-coupling factor OS=Escherichia coli (strain B / BL21-DE3) OX=469008 GN=mfd PE=3 SV=1	53.0928	52	1164	131.7	6.11	High		4.68913e+07	52	25.4828
A0A140NAA3	Riboflavin biosynthesis protein RibD OS=Escherichia coli (strain B / BL21-DE3) OX=469008 GN=ECBD_3247 PE=3 SV=1	64.0327	19	367	40.2	7.83	High		4.66584e+07	19	25.4756
A0A140N548	30S ribosomal protein S4 OS=Escherichia coli (strain B / BL21-DE3) OX=469008 GN=rpsD PE=3 SV=1	65.534	20	206	23.5	10.05	High		4.60282e+07	20	25.456
A0A140N7F5	50S ribosomal protein L29 OS=Escherichia coli (strain B / BL21-DE3) OX=469008 GN=rpmC PE=3 SV=1	71.4286	6	63	7.3	9.99	High		4.60081e+07	6	25.4554
A0A140NCE4	Aldehyde-alcohol dehydrogenase OS=Escherichia coli (strain B / BL21-DE3) OX=469008 GN=ECBD_2383 PE=3 SV=1	71.0438	63	891	96.1	6.79	High	Met-loss [N-Term]	4.59625e+07	63	25.454
A0A140NA53	Adenine phosphoribosyltransferase OS=Escherichia coli (strain B / BL21-DE3) OX=469008 GN=apt PE=3 SV=1	84.6995	12	183	19.8	5.41	High	Met-loss [N-Term]	4.56952e+07	12	25.4455
A0A140NE87	Single-stranded DNA-binding protein OS=Escherichia coli (strain B / BL21-DE3) OX=469008 GN=ECBD_3973 PE=3 SV=1	50.5618	10	178	19	5.58	High		4.543e+07	10	25.4371
A0A140NCY5	Thiamine-monophosphate kinase OS=Escherichia coli (strain B / BL21-DE3) OX=469008 GN=thiL PE=3 SV=1	49.8462	11	325	35	4.72	High	Met-loss [N-Term]	4.54267e+07	11	25.437
A0A140N9F0	Adenosine deaminase OS=Escherichia coli (strain B / BL21-DE3) OX=469008 GN=add PE=3 SV=1	77.1772	17	333	36.4	5.6	High		4.52313e+07	17	25.4308
A0A140NBG3	Esterase FrsA OS=Escherichia coli (strain B / BL21-DE3) OX=469008 GN=frsA PE=3 SV=1	66.6667	22	414	47	6.95	High	Met-loss [N-Term]	4.51784e+07	22	25.4291
A0A140N2P5	Protein TusB OS=Escherichia coli (strain B / BL21-DE3) OX=469008 GN=tusB PE=3 SV=1	56.8421	3	95	10.7	5.36	High		4.47536e+07	3	25.4155
A0A140NDU1	Non-specific ribonucleoside hydrolase RihC OS=Escherichia coli (strain B / BL21-DE3) OX=469008 GN=rihC PE=3 SV=1	41.1184	9	304	32.6	5.8	High		4.39306e+07	9	25.3887
A0A140NAS9	Maf-like protein YceF OS=Escherichia coli (strain B / BL21-DE3) OX=469008 GN=yceF PE=3 SV=1	57.971	9	207	23.2	6.29	High		4.38779e+07	9	25.387
A0A140N601	ADP-ribose diphosphatase OS=Escherichia coli (strain B / BL21-DE3) OX=469008 GN=ECBD_0705 PE=4 SV=1	66.9856	9	209	23.7	5.07	High		4.38301e+07	9	25.3854
A0A140NC19	Uncharacterized protein OS=Escherichia coli (strain B / BL21-DE3) OX=469008 GN=ECBD_2951 PE=4 SV=1	59.5142	13	247	26.9	5.19	High		4.3709e+07	13	25.3814
A0A140N4N4	Peptidase B OS=Escherichia coli (strain B / BL21-DE3) OX=469008 GN=pepB PE=3 SV=1	80.3279	35	427	46.2	5.77	High		4.34422e+07	35	25.3726
A0A140NDF8	UPF0502 protein YceH OS=Escherichia coli (strain B / BL21-DE3) OX=469008 GN=yceH PE=3 SV=1	60.4651	12	215	24.2	5.06	High		4.33153e+07	12	25.3684
A0A140N8G5	4-aminobutyrate aminotransferase OS=Escherichia coli (strain B / BL21-DE3) OX=469008 GN=ECBD_2315 PE=3 SV=1	9.97625	3	421	44.7	6.19	High		4.2755e+07	3	25.3496
A0A140N814	S-formylglutathione hydrolase OS=Escherichia coli (strain B / BL21-DE3) OX=469008 GN=ECBD_1504 PE=3 SV=1	74.4604	13	278	31.2	5.43	High		4.26361e+07	13	25.3456
A0A140N9Y3	Transcriptional regulator, LacI family OS=Escherichia coli (strain B / BL21-DE3) OX=469008 GN=ECBD_1507 PE=4 SV=1	56.0694	17	346	37.4	6.68	High	Met-loss [N-Term]	4.24249e+07	17	25.3384
A0A140NAC5	Extracellular solute-binding protein family 5 OS=Escherichia coli (strain B / BL21-DE3) OX=469008 GN=ECBD_2287 PE=4 SV=1	48.9758	19	537	59.9	8.41	High		4.20508e+07	19	25.3256
A0A140N7Q1	Uridine kinase OS=Escherichia coli (strain B / BL21-DE3) OX=469008 GN=udk PE=3 SV=1	69.4836	13	213	24.3	6.87	High	Met-loss [N-Term]	4.19794e+07	13	25.3232
A0A140N7G1	DnaA initiator-associating protein DiaA OS=Escherichia coli (strain B / BL21-DE3) OX=469008 GN=diaA PE=3 SV=1	19.3878	2	196	21.1	5.53	High		41829454	2	25.318
A0A140N883	Regulatory protein GntR HTH OS=Escherichia coli (strain B / BL21-DE3) OX=469008 GN=ECBD_0646 PE=4 SV=1	53.1008	9	258	29.8	5.63	High		4.15626e+07	9	25.3088
A0A140SS28	Elongation factor P--(R)-beta-lysine ligase OS=Escherichia coli (strain B / BL21-DE3) OX=469008 GN=epmA PE=3 SV=1	53.8462	10	325	37	5.2	High	Met-loss [N-Term]	4.10781e+07	10	25.2919
A0A140N5W6	Histidinol dehydrogenase OS=Escherichia coli (strain B / BL21-DE3) OX=469008 GN=hisD PE=3 SV=1	28.341	10	434	46.2	5.25	High	Met-loss [N-Term]	4.09639e+07	10	25.2878
A0A140N3B4	Uronate isomerase OS=Escherichia coli (strain B / BL21-DE3) OX=469008 GN=uxaC PE=3 SV=1	74.0426	27	470	54	5.71	High		4.09386e+07	27	25.287
A0A140N9R4	Translation initiation factor IF-3 OS=Escherichia coli (strain B / BL21-DE3) OX=469008 GN=infC PE=3 SV=1	72.2222	12	180	20.6	9.52	High		4.06487e+07	12	25.2767
A0A140N733	2-C-methyl-D-erythritol 4-phosphate cytidylyltransferase OS=Escherichia coli (strain B / BL21-DE3) OX=469008 GN=ispD PE=3 SV=1	56.7797	7	236	25.8	6.65	High	Met-loss [N-Term]	4.04333e+07	7	25.269
A0A140N3P1	Pyridoxal phosphate homeostasis protein OS=Escherichia coli (strain B / BL21-DE3) OX=469008 GN=ECBD_0789 PE=3 SV=1	67.094	12	234	25.8	6.55	High	Met-loss [N-Term]	4.02906e+07	12	25.2639
A0A140NFM9	UDP-N-acetylglucosamine 2-epimerase OS=Escherichia coli (strain B / BL21-DE3) OX=469008 GN=wecB PE=3 SV=1	44.4149	14	376	42.2	6.24	High		4.02209e+07	14	25.2614
A0A140NAK0	Muramoyltetrapeptide carboxypeptidase OS=Escherichia coli (strain B / BL21-DE3) OX=469008 GN=ECBD_2430 PE=4 SV=1	48.6842	11	304	33.5	6.58	High	Met-loss [N-Term]	4.01708e+07	11	25.2596
A0A140NAZ2	50S ribosomal protein L32 OS=Escherichia coli (strain B / BL21-DE3) OX=469008 GN=rpmF PE=3 SV=1	54.386	5	57	6.4	11.03	High		40154119	5	25.259
A0A140NEF9	Pantothenate kinase OS=Escherichia coli (strain B / BL21-DE3) OX=469008 GN=coaA PE=3 SV=1	30.6962	8	316	36.3	6.81	High		3.96215e+07	8	25.2398
A0A140NFJ6	Nicotinate-nucleotide pyrophosphorylase OS=Escherichia coli (strain B / BL21-DE3) OX=469008 GN=ECBD_3510 PE=3 SV=1	66.33	16	297	32.7	5.2	High		3.96199e+07	16	25.2397
A0A140NF80	Nucleoid-associated protein YbaB OS=Escherichia coli (strain B / BL21-DE3) OX=469008 GN=ybaB PE=3 SV=1	73.3945	6	109	12	5.07	High		3.9415e+07	6	25.2322
A0A140N9K7	Peptidase M14 carboxypeptidase A OS=Escherichia coli (strain B / BL21-DE3) OX=469008 GN=ECBD_2291 PE=4 SV=1	33.0579	4	242	26.5	5.91	High		3.93598e+07	4	25.2302
A0A140NEC0	Aspartokinase OS=Escherichia coli (strain B / BL21-DE3) OX=469008 GN=ECBD_4013 PE=3 SV=1	57.2383	19	449	48.5	5.11	High		3.88683e+07	19	25.2121
A0A140N754	Maf-like protein YceF OS=Escherichia coli (strain B / BL21-DE3) OX=469008 GN=yceF PE=3 SV=1	59.8985	9	197	21.5	5.85	High	Met-loss [N-Term]	3.88067e+07	9	25.2098
A0A140N9T9	Uncharacterized protein OS=Escherichia coli (strain B / BL21-DE3) OX=469008 GN=ECBD_1317 PE=4 SV=1	63.8298	4	94	10.3	4.36	High		3.82419e+07	4	25.1887
A0A140N9F9	tRNA (guanine-N(1)-)-methyltransferase OS=Escherichia coli (strain B / BL21-DE3) OX=469008 GN=trmD PE=3 SV=1	32.1569	7	255	28.4	5.78	High		3.81637e+07	7	25.1857
A0A140N848	5-keto-4-deoxy-D-glucarate aldolase OS=Escherichia coli (strain B / BL21-DE3) OX=469008 GN=garL PE=3 SV=1	39.4531	12	256	27.4	6.05	High		3.80918e+07	12	25.183
A0A140NEH9	Primosomal protein 1 OS=Escherichia coli (strain B / BL21-DE3) OX=469008 GN=dnaT PE=3 SV=1	62.5698	6	179	19.4	5.33	High		37929969	6	25.1768
A0A140NFT4	Carbamoyl-phosphate synthase small chain OS=Escherichia coli (strain B / BL21-DE3) OX=469008 GN=carA PE=3 SV=1	73.5602	16	382	41.4	6.38	High		3.77893e+07	16	25.1715
A0A140NEA6	Alcohol dehydrogenase zinc-binding domain protein OS=Escherichia coli (strain B / BL21-DE3) OX=469008 GN=ECBD_3769 PE=4 SV=1	51.0204	11	343	37.1	6.32	High		3.77027e+07	11	25.1682
A0A140NFW5	Protein CreA OS=Escherichia coli (strain B / BL21-DE3) OX=469008 GN=ECBD_3623 PE=4 SV=1	62.4204	10	157	17.1	8.95	High		3.74957e+07	10	25.1602
A0A140N8Q5	Putative PTS IIA-like nitrogen-regulatory protein PtsN OS=Escherichia coli (strain B / BL21-DE3) OX=469008 GN=ECBD_1563 PE=4 SV=1	88.6667	10	150	17	5.49	High	Met-loss [N-Term]	3.71433e+07	10	25.1466
A0A140N7Z9	NADH:flavin oxidoreductase/NADH oxidase OS=Escherichia coli (strain B / BL21-DE3) OX=469008 GN=ECBD_0661 PE=4 SV=1	27.5298	15	672	72.6	6.58	High		3.6906e+07	15	25.1374
A0A140NF49	Uncharacterized protein OS=Escherichia coli (strain B / BL21-DE3) OX=469008 GN=ECBD_3300 PE=4 SV=1	64.8352	6	91	10.3	6.11	High		3.68811e+07	6	25.1364
A0A140N9V2	Tryptophan synthase alpha chain OS=Escherichia coli (strain B / BL21-DE3) OX=469008 GN=trpA PE=3 SV=1	67.9104	14	268	28.7	5.48	High		3.6656e+07	14	25.1275
A0A140N6P4	MazG family protein OS=Escherichia coli (strain B / BL21-DE3) OX=469008 GN=ECBD_0948 PE=4 SV=1	25.8555	5	263	30.3	4.73	High		3.66559e+07	5	25.1275
A0A140N7E7	Chorismate mutase OS=Escherichia coli (strain B / BL21-DE3) OX=469008 GN=ECBD_1087 PE=4 SV=1	49.7409	19	386	43.1	6.68	High	Met-loss [N-Term]	3.65885e+07	19	25.1249
A0A140N923	Iron-sulfur cluster assembly scaffold protein IscU OS=Escherichia coli (strain B / BL21-DE3) OX=469008 GN=ECBD_1155 PE=3 SV=1	85.9375	10	128	13.8	4.93	High		3.6576e+07	10	25.1244
A0A140NFY3	Carbamoyl-phosphate synthase large chain OS=Escherichia coli (strain B / BL21-DE3) OX=469008 GN=carB PE=3 SV=1	71.109	66	1073	117.8	5.34	High		3.61075e+07	66	25.1058
A0A140NCQ5	Thymidine kinase OS=Escherichia coli (strain B / BL21-DE3) OX=469008 GN=tdk PE=3 SV=1	57.0732	8	205	23.4	6.67	High	Met-loss [N-Term]	3.60794e+07	8	25.1047
A0A140N6W7	Sigma E regulatory protein, MucB/RseB OS=Escherichia coli (strain B / BL21-DE3) OX=469008 GN=ECBD_1110 PE=4 SV=1	49.0566	11	318	35.7	8.57	High		3.58592e+07	11	25.0958
A0A140N5P0	Ribosomal RNA small subunit methyltransferase I OS=Escherichia coli (strain B / BL21-DE3) OX=469008 GN=rsmI PE=3 SV=1	79.021	16	286	31.3	6.24	High		3.58558e+07	16	25.0957
A0A140N619	Glycerol-3-phosphate dehydrogenase OS=Escherichia coli (strain B / BL21-DE3) OX=469008 GN=ECBD_1419 PE=3 SV=1	70.1107	31	542	58.9	6.64	High		3.5767e+07	31	25.0921
A0A140NF66	Catalase-peroxidase OS=Escherichia coli (strain B / BL21-DE3) OX=469008 GN=katG PE=3 SV=1	80.303	63	726	80	5.31	High	Met-loss [N-Term]; Met-loss+Acetyl [N-Term]	3.56918e+07	63	25.0891
A0A140N7S1	Ribosome maturation factor RimP OS=Escherichia coli (strain B / BL21-DE3) OX=469008 GN=rimP PE=3 SV=1	35	6	140	15.5	4.73	High		3.56726e+07	6	25.0883
A0A140N6C6	Elongation factor 4 OS=Escherichia coli (strain B / BL21-DE3) OX=469008 GN=lepA PE=3 SV=1	56.4274	27	599	66.5	5.59	High		3.56183e+07	27	25.0861
A0A140NG27	Lipoate-protein ligase A OS=Escherichia coli (strain B / BL21-DE3) OX=469008 GN=lplA PE=3 SV=1	57.9882	17	338	37.9	6.55	High		3.50343e+07	17	25.0623
A0A140NAV6	Periplasmic serine endoprotease DegP-like OS=Escherichia coli (strain B / BL21-DE3) OX=469008 GN=ECBD_3457 PE=3 SV=1	56.3291	24	474	49.3	8.56	High		3.47341e+07	24	25.0499
A0A140N6I7	SseB family protein OS=Escherichia coli (strain B / BL21-DE3) OX=469008 GN=ECBD_1162 PE=4 SV=1	34.1085	6	258	28.6	4.51	High	Met-loss [N-Term]	3.45043e+07	6	25.0403
A0A140NCN3	Putrescine-binding periplasmic protein OS=Escherichia coli (strain B / BL21-DE3) OX=469008 GN=ECBD_2476 PE=3 SV=1	54.023	20	348	38.8	5.39	High		3.4427e+07	20	25.037
A0A140N8L8	Imidazole glycerol phosphate synthase subunit HisH OS=Escherichia coli (strain B / BL21-DE3) OX=469008 GN=hisH PE=3 SV=1	61.7347	12	196	21.7	5.57	High		3.44032e+07	12	25.036
A0A140N9R6	Exoribonuclease 2 OS=Escherichia coli (strain B / BL21-DE3) OX=469008 GN=rnb PE=3 SV=1	54.6584	31	644	72.4	5.67	High		3.41717e+07	31	25.0263
A0A140NDD2	Phosphoserine phosphatase SerB OS=Escherichia coli (strain B / BL21-DE3) OX=469008 GN=ECBD_3632 PE=4 SV=1	34.472	9	322	35	5.72	High		3.37933e+07	9	25.0102
A0A140NGH1	30S ribosomal protein S18 OS=Escherichia coli (strain B / BL21-DE3) OX=469008 GN=rpsR PE=3 SV=1	60	9	75	9	10.59	High		3.36816e+07	9	25.0055
A0A140NAM8	Glutamate 5-kinase OS=Escherichia coli (strain B / BL21-DE3) OX=469008 GN=proB PE=3 SV=1	73.0245	20	367	39	6.54	High	Met-loss [N-Term]	3.36326e+07	20	25.0034
A0A140N1Z5	tRNA (cytidine(34)-2'-O)-methyltransferase OS=Escherichia coli (strain B / BL21-DE3) OX=469008 GN=trmL PE=3 SV=1	71.3376	10	157	17.7	6.68	High		3.3515e+07	10	24.9983
A0A140NDR7	UDP-N-acetylmuramate--L-alanyl-gamma-D-glutamyl-meso-2,6-diaminoheptandioate ligase OS=Escherichia coli (strain B / BL21-DE3) OX=469008 GN=mpl PE=3 SV=1	73.0853	23	457	49.8	5.91	High		3.34842e+07	23	24.997
A0A140NBA0	Probable transcriptional regulatory protein YebC OS=Escherichia coli (strain B / BL21-DE3) OX=469008 GN=yebC PE=3 SV=1	58.9431	14	246	26.4	4.88	High		3.32972e+07	14	24.9889
A0A140N762	Arginine repressor OS=Escherichia coli (strain B / BL21-DE3) OX=469008 GN=argR PE=3 SV=1	36.5385	3	156	17	5.03	High		3.32207e+07	3	24.9856
A0A140N9K4	NADH-quinone oxidoreductase, E subunit OS=Escherichia coli (strain B / BL21-DE3) OX=469008 GN=ECBD_1376 PE=4 SV=1	71.6867	9	166	18.6	5.68	High		3.31804e+07	9	24.9838
A0A140ND46	Dihydroorotase OS=Escherichia coli (strain B / BL21-DE3) OX=469008 GN=pyrC PE=3 SV=1	59.7701	12	348	38.8	6.19	High		3.30876e+07	12	24.9798
A0A140N5Z1	Peptidase M23 OS=Escherichia coli (strain B / BL21-DE3) OX=469008 GN=ECBD_0982 PE=4 SV=1	33.7731	9	379	40.1	9.51	High		3.2857e+07	9	24.9697
A0A140N660	UPF0352 protein YejL OS=Escherichia coli (strain B / BL21-DE3) OX=469008 GN=yejL PE=3 SV=1	92	6	75	8.3	5.78	High		3.2826e+07	6	24.9683
A0A140NAC7	UDP-glucose 6-dehydrogenase OS=Escherichia coli (strain B / BL21-DE3) OX=469008 GN=ECBD_1631 PE=3 SV=1	55.4124	17	388	43.6	6.46	High		3.27701e+07	17	24.9659
A0A140N3S6	Iron-containing alcohol dehydrogenase OS=Escherichia coli (strain B / BL21-DE3) OX=469008 GN=ECBD_0141 PE=4 SV=1	55.3525	12	383	40.3	5.4	High		3.24986e+07	12	24.9539
A0A140N6T2	M20/DapE family protein YgeY OS=Escherichia coli (strain B / BL21-DE3) OX=469008 GN=ECBD_0865 PE=4 SV=1	61.0422	17	403	44.8	4.96	High		3.23035e+07	17	24.9452
A0A140N4S8	Outer membrane protein assembly factor BamC OS=Escherichia coli (strain B / BL21-DE3) OX=469008 GN=bamC PE=3 SV=1	69.7674	16	344	36.8	5.57	High		3.23032e+07	16	24.9452
A0A140N3N3	tRNA (guanine-N(7)-)-methyltransferase OS=Escherichia coli (strain B / BL21-DE3) OX=469008 GN=trmB PE=3 SV=1	27.6151	5	239	27.3	6.92	High		3.21334e+07	5	24.9376
A0A140N5B4	30S ribosomal protein S13 OS=Escherichia coli (strain B / BL21-DE3) OX=469008 GN=rpsM PE=3 SV=1	72.0339	16	118	13.1	10.78	High	Met-loss [N-Term]	3.21043e+07	16	24.9363
A0A140N622	Galactarate dehydratase (L-threo-forming) OS=Escherichia coli (strain B / BL21-DE3) OX=469008 GN=garD PE=3 SV=1	77.6291	25	523	56.4	5.62	High	Met-loss [N-Term]	3.20579e+07	25	24.9342
A0A140N9Z6	Aldehyde Dehydrogenase OS=Escherichia coli (strain B / BL21-DE3) OX=469008 GN=ECBD_2225 PE=3 SV=1	64.0919	28	479	52.2	5.1	High	Met-loss [N-Term]	3.20465e+07	28	24.9337
A0A140N5I1	GTP cyclohydrolase 1 OS=Escherichia coli (strain B / BL21-DE3) OX=469008 GN=folE PE=3 SV=1	70.2703	13	222	24.8	7.33	High	Met-loss [N-Term]	3.17331e+07	13	24.9195
A0A140NH47	N-acetyl-gamma-glutamyl-phosphate reductase OS=Escherichia coli (strain B / BL21-DE3) OX=469008 GN=argC PE=3 SV=1	59.2814	13	334	35.9	5.97	High		3.16259e+07	13	24.9146
A0A140N6D3	Uncharacterized protein OS=Escherichia coli (strain B / BL21-DE3) OX=469008 GN=ECBD_0014 PE=4 SV=1	67.3267	18	404	44.9	6.23	High		3.15419e+07	18	24.9108
A0A140NCA5	Ribosomal RNA large subunit methyltransferase H OS=Escherichia coli (strain B / BL21-DE3) OX=469008 GN=rlmH PE=3 SV=1	79.3548	8	155	17.3	8.66	High		3.15188e+07	8	24.9097
A0A140N844	Glycine cleavage system H protein OS=Escherichia coli (strain B / BL21-DE3) OX=469008 GN=gcvH PE=3 SV=1	34.1085	8	129	13.8	4.09	High	Met-loss [N-Term]	3.12947e+07	8	24.8994
A0A140N7C3	Argininosuccinate synthase OS=Escherichia coli (strain B / BL21-DE3) OX=469008 GN=argG PE=3 SV=1	89.7092	40	447	49.9	5.45	High		3.10641e+07	40	24.8887
A0A140NG83	UDP-N-acetyl-D-mannosamine dehydrogenase OS=Escherichia coli (strain B / BL21-DE3) OX=469008 GN=wecC PE=3 SV=1	56.9048	14	420	45.8	5.39	High		3.08366e+07	14	24.8781
A0A140NFT0	Oxidoreductase FAD/NAD(P)-binding domain protein OS=Escherichia coli (strain B / BL21-DE3) OX=469008 GN=ECBD_4100 PE=4 SV=1	61.2903	11	248	27.7	6.43	High	Met-loss [N-Term]	3.06611e+07	11	24.8699
A0A140SS65	Glutamate racemase OS=Escherichia coli (strain B / BL21-DE3) OX=469008 GN=murI PE=3 SV=1	63.1579	12	285	31	5.36	High		3.05615e+07	12	24.8652
A0A140SS46	tRNA dimethylallyltransferase OS=Escherichia coli (strain B / BL21-DE3) OX=469008 GN=miaA PE=3 SV=1	51.8987	11	316	35	6.01	High		3.04102e+07	11	24.8581
A0A140NAY4	Para-aminobenzoate synthase, subunit I OS=Escherichia coli (strain B / BL21-DE3) OX=469008 GN=ECBD_1830 PE=4 SV=1	53.6424	15	453	51	5.25	High		3.01767e+07	15	24.8469
A0A140N6I9	5'/3'-nucleotidase SurE OS=Escherichia coli (strain B / BL21-DE3) OX=469008 GN=surE PE=3 SV=1	40.3162	7	253	26.9	5.77	High		2.99245e+07	7	24.8348
A0A140NB90	Copper homeostasis protein CutC OS=Escherichia coli (strain B / BL21-DE3) OX=469008 GN=cutC PE=3 SV=1	75.4032	12	248	26.6	6.15	High		2.96762e+07	12	24.8228
A0A140NCU8	Transcriptional regulator, XRE family OS=Escherichia coli (strain B / BL21-DE3) OX=469008 GN=ECBD_2318 PE=4 SV=1	9.72973	1	185	20.1	5.5	High		2.96761e+07	1	24.8228
A0A140N7X1	Probable transcriptional regulatory protein YeeN OS=Escherichia coli (strain B / BL21-DE3) OX=469008 GN=yeeN PE=3 SV=1	45.7983	9	238	25.9	4.82	High		2.96529e+07	9	24.8217
A0A140N3Q6	Lipopolysaccharide export system protein LptA OS=Escherichia coli (strain B / BL21-DE3) OX=469008 GN=lptA PE=3 SV=1	30.2703	5	185	20.2	8.72	High		2.95956e+07	5	24.8189
A0A140N8C6	Methionine--tRNA ligase OS=Escherichia coli (strain B / BL21-DE3) OX=469008 GN=metG PE=3 SV=1	80.5022	48	677	76.2	5.94	High		2.95108e+07	48	24.8147
A0A140NGF5	Uncharacterized protein OS=Escherichia coli (strain B / BL21-DE3) OX=469008 GN=ECBD_3773 PE=4 SV=1	40.8	15	500	54.3	6.29	High	Met-loss [N-Term]	2.93941e+07	15	24.809
A0A140N9M9	1,4-dihydroxy-2-naphthoyl-CoA synthase OS=Escherichia coli (strain B / BL21-DE3) OX=469008 GN=menB PE=3 SV=1	80.3509	16	285	31.6	6.42	High		2.93283e+07	16	24.8058
A0A140N6P2	Alpha amylase catalytic region OS=Escherichia coli (strain B / BL21-DE3) OX=469008 GN=ECBD_0163 PE=4 SV=1	28.5503	12	676	75.7	5.64	High		2.92703e+07	12	24.8029
A0A140N5Z7	50S ribosomal protein L33 OS=Escherichia coli (strain B / BL21-DE3) OX=469008 GN=rpmG PE=3 SV=1	54.5455	5	55	6.4	10.24	High		2.91694e+07	5	24.798
A0A140NF85	Glutamine amidotransferase class-II OS=Escherichia coli (strain B / BL21-DE3) OX=469008 GN=ECBD_3399 PE=4 SV=1	40.3922	10	255	28.6	7.96	High		2.91514e+07	10	24.7971
A0A140NBY5	4-hydroxythreonine-4-phosphate dehydrogenase OS=Escherichia coli (strain B / BL21-DE3) OX=469008 GN=pdxA PE=3 SV=1	40.1216	7	329	35.1	6.32	High		29124450	7	24.7957
A0A140N5K8	50S ribosomal protein L4 OS=Escherichia coli (strain B / BL21-DE3) OX=469008 GN=rplD PE=3 SV=1	83.5821	21	201	22.1	9.73	High		2.90527e+07	21	24.7922
A0A140NDD6	1-deoxy-D-xylulose 5-phosphate reductoisomerase OS=Escherichia coli (strain B / BL21-DE3) OX=469008 GN=dxr PE=3 SV=1	43.9698	12	398	43.4	6.01	High		2.89579e+07	12	24.7875
A0A140NCJ7	Argininosuccinate lyase OS=Escherichia coli (strain B / BL21-DE3) OX=469008 GN=argH PE=3 SV=1	82.9322	31	457	50.3	5.27	High	Met-loss [N-Term]	2.86035e+07	31	24.7697
A0A140N9P6	Aldehyde Dehydrogenase OS=Escherichia coli (strain B / BL21-DE3) OX=469008 GN=ECBD_2117 PE=4 SV=1	54.1126	16	462	49.7	5.63	High		2.84911e+07	16	24.764
A0A140N9T8	Amino acid-binding ACT domain protein OS=Escherichia coli (strain B / BL21-DE3) OX=469008 GN=ECBD_1210 PE=4 SV=1	58.4211	5	190	20.8	5.68	High	Met-loss [N-Term]	2.8482e+07	5	24.7635
A0A140NAD7	Peroxiredoxin OS=Escherichia coli (strain B / BL21-DE3) OX=469008 GN=ECBD_2157 PE=4 SV=1	60.8392	12	143	15.1	5.86	High		2.82686e+07	12	24.7527
A0A140NDI2	Beta-galactosidase OS=Escherichia coli (strain B / BL21-DE3) OX=469008 GN=lacZ PE=3 SV=1	82.5195	68	1024	116.4	5.5	High	Met-loss [N-Term]	2.80211e+07	68	24.74
A0A140NAU7	Ribosome-recycling factor OS=Escherichia coli (strain B / BL21-DE3) OX=469008 GN=frr PE=3 SV=1	78.9189	24	185	20.6	6.89	High	Met-loss [N-Term]	2.79629e+07	24	24.737
A0A140NA64	D-tagatose-1,6-bisphosphate aldolase subunit GatY OS=Escherichia coli (strain B / BL21-DE3) OX=469008 GN=gatY PE=3 SV=1	63.2867	15	286	31.1	6.46	High		2.79216e+07	15	24.7349
A0A140NDX6	dTDP-glucose 4,6-dehydratase OS=Escherichia coli (strain B / BL21-DE3) OX=469008 GN=ECBD_4251 PE=3 SV=1	44.507	9	355	39.7	5.87	High		2.76961e+07	10	24.7232
A0A140N9T5	NAD-dependent malic enzyme OS=Escherichia coli (strain B / BL21-DE3) OX=469008 GN=maeA PE=3 SV=1	70.9735	33	565	63.2	5.31	High		2.75938e+07	33	24.7178
A0A140N3D6	Transcriptional regulator, Crp/Fnr family OS=Escherichia coli (strain B / BL21-DE3) OX=469008 GN=ECBD_0391 PE=4 SV=1	68.0952	15	210	23.6	8.25	High	Met-loss [N-Term]; Met-loss+Acetyl [N-Term]	2.75588e+07	15	24.716
A0A140N6Z2	50S ribosomal protein L16 OS=Escherichia coli (strain B / BL21-DE3) OX=469008 GN=rplP PE=3 SV=1	60.2941	12	136	15.3	11.22	High		2.75489e+07	12	24.7155
A0A140N899	Glucose-6-phosphate 1-dehydrogenase OS=Escherichia coli (strain B / BL21-DE3) OX=469008 GN=zwf PE=3 SV=1	82.2811	36	491	55.7	5.76	High	Met-loss [N-Term]	2.74826e+07	36	24.712
A0A140NB69	Integration host factor subunit alpha OS=Escherichia coli (strain B / BL21-DE3) OX=469008 GN=ihfA PE=3 SV=1	63.6364	10	99	11.3	9.35	High	Met-loss [N-Term]	2.74248e+07	10	24.709
A0A140N2U8	Glycine--tRNA ligase beta subunit OS=Escherichia coli (strain B / BL21-DE3) OX=469008 GN=glyS PE=3 SV=1	88.5341	66	689	76.8	5.44	High		2.72984e+07	66	24.7023
A0A140NF86	ATP-dependent protease ATPase subunit HslU OS=Escherichia coli (strain B / BL21-DE3) OX=469008 GN=hslU PE=2 SV=1	77.4266	41	443	49.6	5.35	High		2.71119e+07	41	24.6924
A0A140NEB2	4-hydroxy-tetrahydrodipicolinate reductase OS=Escherichia coli (strain B / BL21-DE3) OX=469008 GN=dapB PE=3 SV=1	72.5275	15	273	28.7	5.76	High		2.695e+07	15	24.6838
A0A140NDB7	UPF0246 protein YaaA OS=Escherichia coli (strain B / BL21-DE3) OX=469008 GN=yaaA PE=3 SV=1	65.1163	13	258	29.6	7.47	High		2.69159e+07	13	24.682
A0A140ND69	Gamma-glutamyl phosphate reductase OS=Escherichia coli (strain B / BL21-DE3) OX=469008 GN=proA PE=3 SV=1	86.3309	26	417	44.6	5.64	High		2.68584e+07	26	24.6789
A0A140NCR3	Protein FdhE OS=Escherichia coli (strain B / BL21-DE3) OX=469008 GN=fdhE PE=3 SV=1	71.521	17	309	34.7	5.19	High		2.6842e+07	17	24.678
A0A140N5V8	Phosphomannomutase OS=Escherichia coli (strain B / BL21-DE3) OX=469008 GN=ECBD_1629 PE=3 SV=1	45.5947	19	454	50.2	5.76	High		2.6841e+07	19	24.6779
A0A140N6D6	Uncharacterized protein OS=Escherichia coli (strain B / BL21-DE3) OX=469008 GN=ECBD_1552 PE=4 SV=1	77.7778	6	81	9.1	8.75	High		2.662e+07	6	24.666
A0A140NG64	Diaminopimelate epimerase OS=Escherichia coli (strain B / BL21-DE3) OX=469008 GN=dapF PE=3 SV=1	52.9197	9	274	30.2	6.28	High		2.64283e+07	9	24.6556
A0A140NEP7	Glucosamine-6-phosphate deaminase OS=Escherichia coli (strain B / BL21-DE3) OX=469008 GN=nagB PE=3 SV=1	69.1729	11	266	29.8	6.9	High		2.64276e+07	11	24.6555
A0A140N3T4	Translation initiation factor IF-2 OS=Escherichia coli (strain B / BL21-DE3) OX=469008 GN=infB PE=3 SV=1	65.5056	60	890	97.3	6.07	High		2.62697e+07	60	24.6469
A0A140SSA3	Glucose-1-phosphate thymidylyltransferase OS=Escherichia coli (strain B / BL21-DE3) OX=469008 GN=ECBD_4250 PE=3 SV=1	42.6621	8	293	32.7	5.43	High	Met-loss [N-Term]	2.61993e+07	9	24.643
A0A140NCR7	Recombination protein RecR OS=Escherichia coli (strain B / BL21-DE3) OX=469008 GN=recR PE=3 SV=1	29.8507	4	201	21.9	5.25	High		2.61292e+07	4	24.6392
A0A140NG49	Multicopper oxidase type 3 OS=Escherichia coli (strain B / BL21-DE3) OX=469008 GN=ECBD_3496 PE=4 SV=1	42.4419	12	516	56.5	6.79	High		2.60827e+07	12	24.6366
A0A140NCM6	3'(2'),5'-bisphosphate nucleotidase OS=Escherichia coli (strain B / BL21-DE3) OX=469008 GN=ECBD_3815 PE=4 SV=1	79.2683	13	246	27.2	5.96	High	Met-loss [N-Term]	2.60773e+07	13	24.6363
A0A140N6Z9	30S ribosomal protein S5 OS=Escherichia coli (strain B / BL21-DE3) OX=469008 GN=rpsE PE=3 SV=1	91.018	19	167	17.5	10.23	High	Met-loss+Acetyl [N-Term]	2.57624e+07	19	24.6188
A0A140ND79	Acyl-CoA thioesterase II OS=Escherichia coli (strain B / BL21-DE3) OX=469008 GN=ECBD_3203 PE=4 SV=1	24.1259	6	286	31.9	6.67	High		2.55919e+07	6	24.6092
A0A140N6W8	30S ribosomal protein S7 OS=Escherichia coli (strain B / BL21-DE3) OX=469008 GN=rpsG PE=3 SV=1	82.6923	22	156	17.6	10.3	High		2.55606e+07	22	24.6074
A0A140NE69	3-isopropylmalate dehydratase large subunit OS=Escherichia coli (strain B / BL21-DE3) OX=469008 GN=leuC PE=3 SV=1	34.3348	11	466	49.9	6.32	High		2.51752e+07	11	24.5855
A0A140NBZ0	Putative sensory transduction regulator OS=Escherichia coli (strain B / BL21-DE3) OX=469008 GN=ECBD_2741 PE=4 SV=1	15.8228	2	158	17.7	4.34	High	Met-loss [N-Term]	2.51369e+07	2	24.5833
A0A140SS57	Phosphoribosylamine--glycine ligase OS=Escherichia coli (strain B / BL21-DE3) OX=469008 GN=purD PE=3 SV=1	41.0256	12	429	46	5.02	High		2.51169e+07	12	24.5822
A0A140N9M6	Extracellular solute-binding protein family 3 OS=Escherichia coli (strain B / BL21-DE3) OX=469008 GN=ECBD_2996 PE=4 SV=1	67.5497	21	302	33.4	8.53	High		2.49e+07	21	24.5696
C5W331	Ribosomal RNA small subunit methyltransferase H OS=Escherichia coli (strain B / BL21-DE3) OX=469008 GN=rsmH PE=3 SV=1	49.2013	12	313	34.9	6.46	High		2.48577e+07	12	24.5672
A0A140N8C3	UPF0301 protein YqgE OS=Escherichia coli (strain B / BL21-DE3) OX=469008 GN=yqgE PE=3 SV=1	56.872	10	211	23.3	5.4	High		2.47507e+07	10	24.561
A0A140N537	30S ribosomal protein S8 OS=Escherichia coli (strain B / BL21-DE3) OX=469008 GN=rpsH PE=3 SV=1	74.6154	13	130	14.1	9.42	High	Met-loss [N-Term]	2.45663e+07	13	24.5502
A0A140N8Z4	Protein MtfA OS=Escherichia coli (strain B / BL21-DE3) OX=469008 GN=mtfA PE=3 SV=1	24.9057	7	265	30.2	4.73	High		2.45116e+07	7	24.547
A0A140NCF6	Cell division coordinator CpoB OS=Escherichia coli (strain B / BL21-DE3) OX=469008 GN=cpoB PE=3 SV=1	54.3726	11	263	28.2	8.19	High		2.43586e+07	11	24.5379
A0A140N3K3	Hydrogenase assembly chaperone hypC/hupF OS=Escherichia coli (strain B / BL21-DE3) OX=469008 GN=ECBD_0748 PE=4 SV=1	8.53659	1	82	8.8	4.35	High		2.41624e+07	1	24.5263
A0A140NH36	Bifunctional ligase/repressor BirA OS=Escherichia coli (strain B / BL21-DE3) OX=469008 GN=birA PE=3 SV=1	34.2679	8	321	35.3	6.64	High		2.40644e+07	8	24.5204
A0A140ND53	Ferric uptake regulator, Fur family OS=Escherichia coli (strain B / BL21-DE3) OX=469008 GN=ECBD_3987 PE=3 SV=1	41.5205	5	171	19.2	6.43	High		2.40573e+07	5	24.52
A0A140N9J8	Transketolase OS=Escherichia coli (strain B / BL21-DE3) OX=469008 GN=ECBD_1225 PE=3 SV=1	61.0195	25	667	73	6.29	High		2.40506e+07	28	24.5196
A0A140NAD8	Pyrimidine-specific ribonucleoside hydrolase RihA OS=Escherichia coli (strain B / BL21-DE3) OX=469008 GN=rihA PE=3 SV=1	71.7042	14	311	33.8	4.97	High	Met-loss [N-Term]	2.40334e+07	14	24.5185
A0A140NAF7	Formyltetrahydrofolate deformylase OS=Escherichia coli (strain B / BL21-DE3) OX=469008 GN=purU PE=3 SV=1	44.6429	9	280	31.9	7.01	High		2.39085e+07	9	24.511
A0A140N643	Hydrogenase expression/formation protein OS=Escherichia coli (strain B / BL21-DE3) OX=469008 GN=ECBD_0745 PE=4 SV=1	72.561	10	164	17.8	4.73	High		2.38107e+07	10	24.5051
A0A140N429	L-serine dehydratase 1 OS=Escherichia coli (strain B / BL21-DE3) OX=469008 GN=ECBD_0931 PE=4 SV=1	18.022	6	455	48.7	5.91	High	Met-loss [N-Term]	2.37215e+07	8	24.4997
A0A140N9B9	Transcriptional regulator, XRE family OS=Escherichia coli (strain B / BL21-DE3) OX=469008 GN=ECBD_2889 PE=4 SV=1	37.037	7	216	24	5.99	High		2.35457e+07	7	24.489
A0A140NCT2	Fumarate reductase flavoprotein subunit OS=Escherichia coli (strain B / BL21-DE3) OX=469008 GN=ECBD_3875 PE=3 SV=1	41.6944	16	602	65.9	6.28	High		2.34677e+07	16	24.4842
A0A140NBE6	Threonine aldolase OS=Escherichia coli (strain B / BL21-DE3) OX=469008 GN=ECBD_2724 PE=4 SV=1	81.3814	18	333	36.5	6.19	High		23226025	18	24.4692
A0A140N6T7	50S ribosomal protein L19 OS=Escherichia coli (strain B / BL21-DE3) OX=469008 GN=rplS PE=3 SV=1	67.8261	12	115	13.1	10.62	High		2.30573e+07	12	24.4587
A0A140N6Q3	Substrate-binding region of ABC-type glycine betaine transport system OS=Escherichia coli (strain B / BL21-DE3) OX=469008 GN=ECBD_1040 PE=4 SV=1	74.8485	11	330	36	6.46	High		2.29283e+07	11	24.4506
A0A140NEY3	Porphobilinogen deaminase OS=Escherichia coli (strain B / BL21-DE3) OX=469008 GN=hemC PE=3 SV=1	75	22	320	34.6	5.47	High		2.2924e+07	22	24.4504
A0A140NBJ1	Uncharacterized protein OS=Escherichia coli (strain B / BL21-DE3) OX=469008 GN=ECBD_2591 PE=4 SV=1	77.3333	5	75	8.5	4.63	High		2.28586e+07	5	24.4462
A0A140NAF3	Uncharacterized protein OS=Escherichia coli (strain B / BL21-DE3) OX=469008 GN=ECBD_2576 PE=4 SV=1	41.6	12	375	41.1	5.11	High		2.28198e+07	12	24.4438
A0A140NB75	Delta-aminolevulinic acid dehydratase OS=Escherichia coli (strain B / BL21-DE3) OX=469008 GN=ECBD_3292 PE=3 SV=1	75.9259	24	324	35.6	5.39	High	Met-loss [N-Term]	2.26709e+07	24	24.4343
A0A140NEE1	tRNA (cytidine/uridine-2'-O-)-methyltransferase TrmJ OS=Escherichia coli (strain B / BL21-DE3) OX=469008 GN=trmJ PE=4 SV=1	56.5789	10	228	25.3	5.95	High		2.26244e+07	10	24.4314
A0A140NGG0	Transcriptional regulator, TetR family OS=Escherichia coli (strain B / BL21-DE3) OX=469008 GN=ECBD_3824 PE=4 SV=1	13.9535	2	215	24.8	6.52	High		2.25047e+07	2	24.4237
A0A140NHL8	Transcription termination/antitermination protein NusG OS=Escherichia coli (strain B / BL21-DE3) OX=469008 GN=nusG PE=3 SV=1	62.4309	10	181	20.5	6.81	High		2.24345e+07	10	24.4192
A0A140N9H4	1,4-dihydroxy-2-naphthoyl-CoA hydrolase OS=Escherichia coli (strain B / BL21-DE3) OX=469008 GN=menI PE=3 SV=1	38.9706	4	136	14.9	7.43	High		2.21506e+07	4	24.4008
A0A140N9A8	Oxygen-dependent coproporphyrinogen-III oxidase OS=Escherichia coli (strain B / BL21-DE3) OX=469008 GN=hemF PE=3 SV=1	7.02341	2	299	34.3	6.33	High		2.20962e+07	2	24.3973
A0A140NET3	Acetyl esterase OS=Escherichia coli (strain B / BL21-DE3) OX=469008 GN=aes PE=3 SV=1	25.3918	5	319	36	5.19	High		2.20503e+07	5	24.3943
A0A140NCP8	Ribosomal silencing factor RsfS OS=Escherichia coli (strain B / BL21-DE3) OX=469008 GN=rsfS PE=3 SV=1	60	7	105	11.6	4.7	High		2.20285e+07	7	24.3929
A0A140N7B0	Acetylornithine/succinyldiaminopimelate aminotransferase OS=Escherichia coli (strain B / BL21-DE3) OX=469008 GN=argD PE=3 SV=1	91.3793	20	406	43.7	6.23	High	Met-loss [N-Term]	2.19156e+07	21	24.3855
A0A140N388	Glycerate kinase OS=Escherichia coli (strain B / BL21-DE3) OX=469008 GN=ECBD_0618 PE=3 SV=1	36.2205	10	381	39.1	5.06	High		2.17151e+07	10	24.3722
A0A140NDS5	Omega-amidase YafV OS=Escherichia coli (strain B / BL21-DE3) OX=469008 GN=yafV PE=1 SV=1	39.4531	8	256	28.9	6.54	High		2.16025e+07	8	24.3647
A0A140N8J7	dTDP-4-dehydrorhamnose reductase OS=Escherichia coli (strain B / BL21-DE3) OX=469008 GN=ECBD_1615 PE=3 SV=1	70.903	16	299	32.6	6.44	High		2.16022e+07	16	24.3647
A0A140N9P3	NADH-quinone oxidoreductase OS=Escherichia coli (strain B / BL21-DE3) OX=469008 GN=ECBD_1378 PE=3 SV=1	71.4758	53	908	100.2	6.32	High		2.15866e+07	53	24.3636
A0A140NAR1	Beta-hexosaminidase OS=Escherichia coli (strain B / BL21-DE3) OX=469008 GN=nagZ PE=3 SV=1	55.4252	17	341	37.6	6.24	High		2.13751e+07	17	24.3494
A0A140N9S8	Uncharacterized protein OS=Escherichia coli (strain B / BL21-DE3) OX=469008 GN=ECBD_2072 PE=4 SV=1	63.6364	3	66	7.7	5.45	High		2.13735e+07	3	24.3493
A0A140N7Y7	Trans-aconitate 2-methyltransferase OS=Escherichia coli (strain B / BL21-DE3) OX=469008 GN=tam PE=3 SV=1	34.5238	5	252	29	4.94	High		2.13352e+07	5	24.3467
A0A140N5A7	Extracellular solute-binding protein family 5 OS=Escherichia coli (strain B / BL21-DE3) OX=469008 GN=ECBD_0719 PE=4 SV=1	34.2056	13	535	60.7	6.81	High		2.12907e+07	13	24.3437
A0A140NCD4	UspA domain protein OS=Escherichia coli (strain B / BL21-DE3) OX=469008 GN=ECBD_3045 PE=4 SV=1	93.662	11	142	15.9	6.52	High		2.12891e+07	11	24.3436
A0A140NGB8	Bis(5'-nucleosyl)-tetraphosphatase, symmetrical OS=Escherichia coli (strain B / BL21-DE3) OX=469008 GN=apaH PE=3 SV=1	48.2143	11	280	31.3	5.39	High	Met-loss [N-Term]	2.11963e+07	11	24.3373
A0A140N730	Sigma 54 modulation protein/ribosomal protein S30EA OS=Escherichia coli (strain B / BL21-DE3) OX=469008 GN=ECBD_1088 PE=4 SV=1	74.3363	11	113	12.8	6.68	High		2.11717e+07	11	24.3356
A0A140NBS1	50S ribosomal protein L20 OS=Escherichia coli (strain B / BL21-DE3) OX=469008 GN=rplT PE=3 SV=1	47.4576	8	118	13.5	11.47	High		2.10417e+07	8	24.3268
A0A140N7E4	Peroxiredoxin OS=Escherichia coli (strain B / BL21-DE3) OX=469008 GN=ECBD_1209 PE=4 SV=1	90.3846	15	156	17.6	5.24	High		2.08882e+07	15	24.3162
A0A140NAB8	Glutaredoxin, GrxB family OS=Escherichia coli (strain B / BL21-DE3) OX=469008 GN=ECBD_2536 PE=4 SV=1	86.9767	25	215	24.3	7.96	High		2.0884e+07	25	24.3159
A0A140N2S3	50S ribosomal protein L22 OS=Escherichia coli (strain B / BL21-DE3) OX=469008 GN=rplV PE=3 SV=1	65.4545	14	110	12.2	10.23	High		20805646	14	24.3105
A0A140N9R2	Phosphoribosylformylglycinamidine cyclo-ligase OS=Escherichia coli (strain B / BL21-DE3) OX=469008 GN=purM PE=3 SV=1	19.1304	5	345	36.9	4.96	High		2.07336e+07	5	24.3055
A0A140N5F9	Uncharacterized protein OS=Escherichia coli (strain B / BL21-DE3) OX=469008 GN=ECBD_0780 PE=4 SV=1	29.6296	3	108	12.9	4.96	High		2.07161e+07	3	24.3042
A0A140NDY9	PEBP family protein OS=Escherichia coli (strain B / BL21-DE3) OX=469008 GN=ECBD_2850 PE=4 SV=1	58.8608	7	158	17.1	5.66	High		2.06997e+07	7	24.3031
A0A140NDJ6	Isochorismatase hydrolase OS=Escherichia coli (strain B / BL21-DE3) OX=469008 GN=ECBD_2698 PE=4 SV=1	55.2885	7	208	23.1	5.41	High		2.0655e+07	7	24.3
A0A140NBR2	ErfK/YbiS/YcfS/YnhG family protein OS=Escherichia coli (strain B / BL21-DE3) OX=469008 GN=ECBD_2804 PE=4 SV=1	56.8627	9	306	33.3	6.4	High		2.06099e+07	10	24.2968
A0A140N788	Glutamate synthase, small subunit OS=Escherichia coli (strain B / BL21-DE3) OX=469008 GN=ECBD_0529 PE=4 SV=1	56.3559	20	472	52	5.71	High	Met-loss [N-Term]	2.0533e+07	20	24.2914
A0A140ND09	Histidine triad (HIT) protein OS=Escherichia coli (strain B / BL21-DE3) OX=469008 GN=ECBD_2498 PE=4 SV=1	95.7983	8	119	13.2	6.18	High	Met-loss [N-Term]	2.0455e+07	8	24.286
A0A140N8I5	Hydroxypyruvate isomerase OS=Escherichia coli (strain B / BL21-DE3) OX=469008 GN=ECBD_0985 PE=3 SV=1	19.3798	4	258	29.2	5.16	High		2.04152e+07	4	24.2831
A0A140NGB9	Ornithine carbamoyltransferase OS=Escherichia coli (strain B / BL21-DE3) OX=469008 GN=argI PE=3 SV=1	56.2874	14	334	36.8	5.68	High		2.03063e+07	14	24.2754
A0A140N7H9	Pyridoxine 5'-phosphate synthase OS=Escherichia coli (strain B / BL21-DE3) OX=469008 GN=pdxJ PE=3 SV=1	76.5432	14	243	26.4	5.95	High	Met-loss [N-Term]	2.02739e+07	14	24.2731
A0A140ND57	Uncharacterized protein OS=Escherichia coli (strain B / BL21-DE3) OX=469008 GN=ECBD_2548 PE=4 SV=1	62.0968	5	124	14.3	3.71	High	Met-loss [N-Term]	2.01958e+07	5	24.2676
A0A140NBY1	Transcriptional regulator SlyA OS=Escherichia coli (strain B / BL21-DE3) OX=469008 GN=slyA PE=3 SV=1	75.6944	8	144	16.3	7.14	High		2.01845e+07	8	24.2667
A0A140N5Q1	tRNA N6-adenosine threonylcarbamoyltransferase OS=Escherichia coli (strain B / BL21-DE3) OX=469008 GN=tsaD PE=3 SV=1	25.5193	8	337	36	6.33	High		2.01598e+07	8	24.265
A0A140NCI4	N5-carboxyaminoimidazole ribonucleotide synthase OS=Escherichia coli (strain B / BL21-DE3) OX=469008 GN=purK PE=3 SV=1	20.8451	6	355	39.5	5.92	High		2.01466e+07	6	24.264
A0A140NAD1	Histidine biosynthesis bifunctional protein HisIE OS=Escherichia coli (strain B / BL21-DE3) OX=469008 GN=hisI PE=3 SV=1	33.9901	4	203	22.7	5.41	High		2.00525e+07	4	24.2573
A0A140NA84	Phosphate acetyltransferase OS=Escherichia coli (strain B / BL21-DE3) OX=469008 GN=ECBD_1362 PE=3 SV=1	68.4874	43	714	77.1	5.41	High	Met-loss [N-Term]	2.00226e+07	43	24.2551
A0A140N7K1	Putative mono-oxygenase ydhR OS=Escherichia coli (strain B / BL21-DE3) OX=469008 GN=ECBD_1978 PE=4 SV=1	55.4455	7	101	11.3	5.15	High		2.00101e+07	7	24.2542
A0A140NFU3	30S ribosomal protein S20 OS=Escherichia coli (strain B / BL21-DE3) OX=469008 GN=rpsT PE=3 SV=1	45.977	8	87	9.7	11.18	High		1.98715e+07	8	24.2442
A0A140NCX5	DNA topoisomerase 1 OS=Escherichia coli (strain B / BL21-DE3) OX=469008 GN=topA PE=3 SV=1	58.4971	43	865	97.3	8.46	High		1.98383e+07	43	24.2418
A0A140N8B7	Aminotransferase class V OS=Escherichia coli (strain B / BL21-DE3) OX=469008 GN=ECBD_0912 PE=3 SV=1	37.9052	12	401	43.2	5.52	High		1.9638e+07	12	24.2271
A0A140N6S2	Microcompartments protein OS=Escherichia coli (strain B / BL21-DE3) OX=469008 GN=ECBD_1243 PE=4 SV=1	35.6164	4	219	22.8	4.92	High		1.95376e+07	4	24.2198
A0A140SS32	Divalent-cation tolerance protein CutA OS=Escherichia coli (strain B / BL21-DE3) OX=469008 GN=cutA PE=3 SV=1	63.3929	4	112	12.3	4.96	High		1.95311e+07	4	24.2193
A0A140N9Z8	Phosphocarrier, HPr family OS=Escherichia coli (strain B / BL21-DE3) OX=469008 GN=ECBD_1489 PE=4 SV=1	17.5532	6	376	39.7	4.94	High		1.94982e+07	6	24.2168
A0A140N3X6	Extracellular solute-binding protein family 5 OS=Escherichia coli (strain B / BL21-DE3) OX=469008 GN=ECBD_0192 PE=4 SV=1	25.7944	9	535	60.3	6.65	High		1.93549e+07	9	24.2062
A0A140NCN1	Endoribonuclease YbeY OS=Escherichia coli (strain B / BL21-DE3) OX=469008 GN=ybeY PE=3 SV=1	14.1935	2	155	17.5	4.37	High		1.92942e+07	2	24.2017
A0A140N5V3	Oxidoreductase domain protein OS=Escherichia coli (strain B / BL21-DE3) OX=469008 GN=ECBD_0655 PE=4 SV=1	40.5488	11	328	36.2	6.18	High		1.92582e+07	12	24.199
A0A140N8M8	Exodeoxyribonuclease I OS=Escherichia coli (strain B / BL21-DE3) OX=469008 GN=ECBD_1646 PE=4 SV=1	32.8421	13	475	54.5	5.82	High		1.924e+07	13	24.1976
A0A140NCD0	Maltodextrin-binding protein OS=Escherichia coli (strain B / BL21-DE3) OX=469008 GN=ECBD_4002 PE=3 SV=1	88.3838	42	396	43.4	5.71	High		1.90914e+07	42	24.1864
A0A140N5M2	tRNA pseudouridine synthase B OS=Escherichia coli (strain B / BL21-DE3) OX=469008 GN=truB PE=3 SV=1	46.1783	10	314	35.1	5.97	High		1.90881e+07	10	24.1862
A0A140N3E3	Protein SlyX OS=Escherichia coli (strain B / BL21-DE3) OX=469008 GN=slyX PE=3 SV=1	41.6667	3	72	8.2	4.92	High		1.90237e+07	3	24.1813
A0A140N621	Phosphopantetheine adenylyltransferase OS=Escherichia coli (strain B / BL21-DE3) OX=469008 GN=coaD PE=3 SV=1	74.2138	8	159	17.8	7.02	High		1.8808e+07	8	24.1648
A0A140N7J1	50S ribosomal protein L2 OS=Escherichia coli (strain B / BL21-DE3) OX=469008 GN=rplB PE=3 SV=1	72.1612	27	273	29.8	10.93	High		1.87563e+07	27	24.1609
A0A140N5L4	Glutathione transferase OS=Escherichia coli (strain B / BL21-DE3) OX=469008 GN=ECBD_0637 PE=4 SV=1	11.2805	3	328	37.4	6.52	High		1.87332e+07	3	24.1591
A0A140N9V3	Cationic amino acid ABC transporter, periplasmic binding protein OS=Escherichia coli (strain B / BL21-DE3) OX=469008 GN=ECBD_2812 PE=3 SV=1	67.3387	15	248	27.2	8.51	High		1.83092e+07	15	24.1261
A0A140NDI9	3-methyl-2-oxobutanoate hydroxymethyltransferase OS=Escherichia coli (strain B / BL21-DE3) OX=469008 GN=panB PE=3 SV=1	65.1515	8	264	28.1	5.3	High		18209910	8	24.1182
A0A140N5W3	Aminotransferase class I and II OS=Escherichia coli (strain B / BL21-DE3) OX=469008 GN=ECBD_1369 PE=4 SV=1	35.8025	10	405	45.5	6.25	High		1.82053e+07	10	24.1179
A0A140N7X2	Uncharacterized protein OS=Escherichia coli (strain B / BL21-DE3) OX=469008 GN=ECBD_0762 PE=4 SV=1	50	4	134	13.7	6.06	High		1.76059e+07	4	24.0696
A0A140NFK0	Methionine synthase OS=Escherichia coli (strain B / BL21-DE3) OX=469008 GN=ECBD_4018 PE=4 SV=1	63.8957	61	1227	135.9	5.07	High		1.75915e+07	62	24.0684
A0A140NA57	Phosphatase NudJ OS=Escherichia coli (strain B / BL21-DE3) OX=469008 GN=nudJ PE=3 SV=1	93.4641	9	153	17.4	5.14	High		1.74894e+07	9	24.06
A0A140N544	T-protein OS=Escherichia coli (strain B / BL21-DE3) OX=469008 GN=ECBD_1086 PE=4 SV=1	27.6139	9	373	42	6.01	High		1.74277e+07	9	24.0549
A0A140N8B3	Peptidase M16 domain protein OS=Escherichia coli (strain B / BL21-DE3) OX=469008 GN=ECBD_0904 PE=3 SV=1	32.1206	22	962	107.7	6.09	High		1.73446e+07	22	24.048
A0A140NEX4	Uncharacterized protein OS=Escherichia coli (strain B / BL21-DE3) OX=469008 GN=ECBD_4227 PE=4 SV=1	21.3333	4	300	32.7	6.92	High		1.71849e+07	4	24.0346
A0A140NDN9	DNA protection during starvation protein OS=Escherichia coli (strain B / BL21-DE3) OX=469008 GN=dps PE=3 SV=1	82.0359	19	167	18.7	6.11	High		1.70673e+07	19	24.0247
A0A140N904	Tetratricopeptide TPR_2 repeat protein OS=Escherichia coli (strain B / BL21-DE3) OX=469008 GN=ECBD_1135 PE=4 SV=1	76.5782	65	1093	123.8	5.82	High		1.70656e+07	65	24.0246
A0A140N6U4	Hydrogenase accessory protein HypB OS=Escherichia coli (strain B / BL21-DE3) OX=469008 GN=ECBD_0998 PE=4 SV=1	32.069	5	290	31.5	5.66	High		1.69271e+07	5	24.0128
A0A140NCB6	Cob(I)yrinic acid a,c-diamide adenosyltransferase OS=Escherichia coli (strain B / BL21-DE3) OX=469008 GN=ECBD_2352 PE=3 SV=1	30.6122	5	196	22	6.54	High		1.6926e+07	5	24.0127
A0A140N8N4	Phenylalanine--tRNA ligase beta subunit OS=Escherichia coli (strain B / BL21-DE3) OX=469008 GN=pheT PE=3 SV=1	82.3899	54	795	87.3	5.3	High		1.67859e+07	54	24.0007
A0A140NFK2	30S ribosomal protein S2 OS=Escherichia coli (strain B / BL21-DE3) OX=469008 GN=rpsB PE=3 SV=1	87.5519	28	241	26.7	7.14	High	Met-loss [N-Term]	1.67546e+07	28	23.9981
A0A140N6W9	Alanine--tRNA ligase OS=Escherichia coli (strain B / BL21-DE3) OX=469008 GN=alaS PE=3 SV=1	84.7032	77	876	96	5.92	High		1.67033e+07	77	23.9936
A0A140NB18	Curved DNA-binding protein OS=Escherichia coli (strain B / BL21-DE3) OX=469008 GN=cbpA PE=3 SV=1	51.3072	11	306	34.4	6.81	High		1.6552e+07	11	23.9805
A0A140N5N0	GCN5-related N-acetyltransferase OS=Escherichia coli (strain B / BL21-DE3) OX=469008 GN=ECBD_0584 PE=4 SV=1	61.0778	10	167	18.5	4.73	High		1.64498e+07	10	23.9716
A0A140NBT9	Cell division protein FtsA OS=Escherichia coli (strain B / BL21-DE3) OX=469008 GN=ftsA PE=3 SV=1	20.4762	4	420	45.3	6.24	High		1.64326e+07	4	23.9701
A0A140NDC7	Protein translocase subunit SecD OS=Escherichia coli (strain B / BL21-DE3) OX=469008 GN=secD PE=3 SV=1	18.3775	10	604	65.1	8	High		1.64191e+07	11	23.9689
A0A140N7X0	Arabinose 5-phosphate isomerase OS=Escherichia coli (strain B / BL21-DE3) OX=469008 GN=ECBD_0545 PE=3 SV=1	57.622	16	328	35.2	6.71	High	Met-loss [N-Term]; Met-loss+Acetyl [N-Term]	1.62156e+07	16	23.9509
A0A140N6V2	Diaminopimelate decarboxylase OS=Escherichia coli (strain B / BL21-DE3) OX=469008 GN=lysA PE=3 SV=1	41.1905	7	420	46.1	6.04	High	Met-loss [N-Term]	1.62142e+07	7	23.9508
A0A140N7B9	Exodeoxyribonuclease III OS=Escherichia coli (strain B / BL21-DE3) OX=469008 GN=ECBD_1895 PE=4 SV=1	76.1029	19	272	31.3	6.19	High		1.61383e+07	19	23.944
A0A140NF74	Bifunctional aspartokinase/homoserine dehydrogenase OS=Escherichia coli (strain B / BL21-DE3) OX=469008 GN=ECBD_4083 PE=3 SV=1	49.2593	33	810	88.9	5.59	High		1.60704e+07	33	23.9379
A0A140N4Z8	Protein TusC OS=Escherichia coli (strain B / BL21-DE3) OX=469008 GN=tusC PE=3 SV=1	36.9748	3	119	13	4.88	High		1.60188e+07	3	23.9333
A0A140NBV2	UvrABC system protein B OS=Escherichia coli (strain B / BL21-DE3) OX=469008 GN=uvrB PE=3 SV=1	36.9985	21	673	76.2	5.24	High		1.59615e+07	21	23.9281
A0A140N7F8	Elongation factor P-like protein OS=Escherichia coli (strain B / BL21-DE3) OX=469008 GN=yeiP PE=3 SV=1	44.2105	8	190	21.5	5.02	High		1.59079e+07	8	23.9232
A0A140NAL9	ABC transporter related OS=Escherichia coli (strain B / BL21-DE3) OX=469008 GN=ECBD_2646 PE=4 SV=1	41.5748	21	635	72	5.5	High	Met-loss [N-Term]	1.5851e+07	21	23.9181
A0A140NFE8	Probable GTP-binding protein EngB OS=Escherichia coli (strain B / BL21-DE3) OX=469008 GN=engB PE=3 SV=1	46.6667	7	210	23.5	7.49	High	Met-loss [N-Term]	1.57919e+07	7	23.9127
A0A140N753	Alpha-1,4 glucan phosphorylase OS=Escherichia coli (strain B / BL21-DE3) OX=469008 GN=ECBD_0328 PE=3 SV=1	74.2785	59	797	90.5	7.39	High	Met-loss [N-Term]	1.56526e+07	59	23.8999
A0A140NAL5	UPF0260 protein YcgN OS=Escherichia coli (strain B / BL21-DE3) OX=469008 GN=ycgN PE=3 SV=1	43.9189	4	148	17.4	4.93	High	Met-loss [N-Term]	1.56509e+07	4	23.8997
A0A140N3R5	BolA family protein OS=Escherichia coli (strain B / BL21-DE3) OX=469008 GN=ECBD_0552 PE=3 SV=1	37.0787	4	89	10	5.36	High		1.5644e+07	4	23.8991
A0A140NEN4	Regulatory protein GntR HTH OS=Escherichia coli (strain B / BL21-DE3) OX=469008 GN=ECBD_3710 PE=4 SV=1	42.0233	7	257	29.3	5.14	High		1.55185e+07	7	23.8875
A0A140N2L7	Ribonuclease PH OS=Escherichia coli (strain B / BL21-DE3) OX=469008 GN=rph PE=3 SV=1	43.6975	7	238	25.3	5.71	High		1.5417e+07	7	23.878
A0A140NCB5	Transcriptional repressor NrdR OS=Escherichia coli (strain B / BL21-DE3) OX=469008 GN=nrdR PE=3 SV=1	69.1275	11	149	17.2	7.8	High		1.5361e+07	11	23.8728
A0A140N5Y7	Ribosome-binding factor A OS=Escherichia coli (strain B / BL21-DE3) OX=469008 GN=rbfA PE=3 SV=1	60.1504	7	133	15.1	6.2	High		1.5353e+07	7	23.872
A0A140N7T6	Tryptophan synthase beta chain OS=Escherichia coli (strain B / BL21-DE3) OX=469008 GN=trpB PE=3 SV=1	39.7985	9	397	43	6.09	High		1.52833e+07	9	23.8655
A0A140NGB7	N-acetylneuraminate epimerase OS=Escherichia coli (strain B / BL21-DE3) OX=469008 GN=nanM PE=3 SV=1	24.7283	5	368	39.5	7.66	High		1.52505e+07	5	23.8624
A0A140N707	Transcriptional modulator of MazE/toxin, MazF OS=Escherichia coli (strain B / BL21-DE3) OX=469008 GN=ECBD_0947 PE=4 SV=1	60.3604	5	111	12.1	8.29	High		1.51221e+07	5	23.8502
A0A140N8Y3	Uncharacterized protein OS=Escherichia coli (strain B / BL21-DE3) OX=469008 GN=ECBD_1835 PE=4 SV=1	47.619	7	231	25.2	5.07	High		1.49112e+07	7	23.8299
A0A140N941	Molybdopterin synthase sulfurylase MoeB OS=Escherichia coli (strain B / BL21-DE3) OX=469008 GN=ECBD_2797 PE=4 SV=1	42.9719	6	249	26.6	5.06	High		1.48913e+07	6	23.828
A0A140N9L0	Alcohol dehydrogenase zinc-binding domain protein OS=Escherichia coli (strain B / BL21-DE3) OX=469008 GN=ECBD_1139 PE=3 SV=1	37.3938	11	353	38	7.01	High		1.47477e+07	11	23.814
A0A140N460	Cell division protein FtsP OS=Escherichia coli (strain B / BL21-DE3) OX=469008 GN=ftsP PE=3 SV=1	39.5745	13	470	51.8	6.34	High		1.4705e+07	13	23.8098
A0A140ND17	Protein translocase subunit SecA OS=Escherichia coli (strain B / BL21-DE3) OX=469008 GN=secA PE=2 SV=1	59.3785	48	901	102	5.6	High		1.46927e+07	48	23.8086
A0A140N7Z4	Cobalamin synthesis protein P47K OS=Escherichia coli (strain B / BL21-DE3) OX=469008 GN=ECBD_1484 PE=4 SV=1	35.9756	10	328	36.1	6.47	High		1.46845e+07	10	23.8078
A0A140NCV1	Uridylate kinase OS=Escherichia coli (strain B / BL21-DE3) OX=469008 GN=pyrH PE=3 SV=1	67.2199	10	241	26	7.39	High		1.46668e+07	10	23.8061
A0A140NF19	Ribokinase OS=Escherichia coli (strain B / BL21-DE3) OX=469008 GN=rbsK PE=3 SV=1	33.0097	5	309	32.2	5.08	High		1.46508e+07	5	23.8045
A0A140N980	Phospholipase/Carboxylesterase OS=Escherichia coli (strain B / BL21-DE3) OX=469008 GN=ECBD_1216 PE=4 SV=1	24.569	4	232	24.8	4.97	High		1.4548e+07	4	23.7943
A0A140N831	Glycoside hydrolase family 3 domain protein OS=Escherichia coli (strain B / BL21-DE3) OX=469008 GN=ECBD_1526 PE=3 SV=1	64.8366	44	765	83.5	6.1	High		1.43885e+07	44	23.7784
A0A140NDK0	Amidohydrolase 3 OS=Escherichia coli (strain B / BL21-DE3) OX=469008 GN=ECBD_3333 PE=4 SV=1	41.5217	12	460	50.5	6.54	High		1.43222e+07	12	23.7718
A0A140N8X2	Two component transcriptional regulator, winged helix family OS=Escherichia coli (strain B / BL21-DE3) OX=469008 GN=ECBD_2469 PE=4 SV=1	77.5785	16	223	25.5	5.26	High		1.42505e+07	16	23.7645
A0A140N6Y7	Putative two component, sigma54 specific, transcriptional regulator, Fis family OS=Escherichia coli (strain B / BL21-DE3) OX=469008 GN=ECBD_1130 PE=4 SV=1	10.3604	4	444	49.1	6.42	High		1.40974e+07	4	23.7489
A0A140SSC0	Thioredoxin OS=Escherichia coli (strain B / BL21-DE3) OX=469008 GN=ECBD_4259 PE=3 SV=1	100	12	109	11.8	4.88	High	Met-loss [N-Term]; Met-loss+Acetyl [N-Term]	1.37722e+07	12	23.7153
A0A140NB99	Cysteine desulfurase OS=Escherichia coli (strain B / BL21-DE3) OX=469008 GN=sufS PE=3 SV=1	22.4138	4	406	44.4	6.25	High		1.37635e+07	4	23.7143
A0A140NDS7	Peptide methionine sulfoxide reductase MsrA OS=Escherichia coli (strain B / BL21-DE3) OX=469008 GN=msrA PE=3 SV=1	71.2264	9	212	23.3	5.19	High		1.37263e+07	9	23.7104
A0A140N4K1	30S ribosomal protein S3 OS=Escherichia coli (strain B / BL21-DE3) OX=469008 GN=rpsC PE=3 SV=1	75.9657	23	233	26	10.27	High		1.36825e+07	23	23.7058
A0A140N884	Aminodeoxychorismate lyase OS=Escherichia coli (strain B / BL21-DE3) OX=469008 GN=ECBD_2505 PE=3 SV=1	29.368	7	269	29.8	6.67	High		1.36735e+07	7	23.7049
A0A140NBI6	Hydroxyacylglutathione hydrolase OS=Escherichia coli (strain B / BL21-DE3) OX=469008 GN=gloB PE=3 SV=1	57.7689	13	251	28.4	5.73	High		1.36461e+07	13	23.702
A0A140N9Y4	Cysteine synthase OS=Escherichia coli (strain B / BL21-DE3) OX=469008 GN=ECBD_1260 PE=3 SV=1	16.8317	4	303	32.6	5.97	High		1.36264e+07	4	23.6999
A0A140N6P1	Phosphoenolpyruvate synthase regulatory protein OS=Escherichia coli (strain B / BL21-DE3) OX=469008 GN=ppsR PE=3 SV=1	36.8231	7	277	31.2	6.43	High		1.34035e+07	7	23.6761
A0A140NBD0	ErfK/YbiS/YcfS/YnhG family protein OS=Escherichia coli (strain B / BL21-DE3) OX=469008 GN=ECBD_1967 PE=4 SV=1	34.1317	7	334	36.1	9.41	High		1.33246e+07	7	23.6676
A0A140N6Y0	Aminotransferase class I and II OS=Escherichia coli (strain B / BL21-DE3) OX=469008 GN=ECBD_2023 PE=4 SV=1	34.1026	9	390	43.6	5.57	High		1.32187e+07	9	23.6561
A0A140NDD4	Nuclease SbcCD subunit D OS=Escherichia coli (strain B / BL21-DE3) OX=469008 GN=sbcD PE=3 SV=1	12.25	3	400	44.7	5.88	High		13111045	3	23.6443
A0A140N965	Transcriptional regulator, TetR family OS=Escherichia coli (strain B / BL21-DE3) OX=469008 GN=ECBD_2827 PE=4 SV=1	24.6637	4	223	25	6.52	High		1.30993e+07	4	23.643
A0A140NAR4	Aldo/keto reductase OS=Escherichia coli (strain B / BL21-DE3) OX=469008 GN=ECBD_3417 PE=4 SV=1	62.5468	16	267	29.5	5.53	High	Met-loss [N-Term]	1.30968e+07	16	23.6427
A0A140N9W8	Uncharacterized protein OS=Escherichia coli (strain B / BL21-DE3) OX=469008 GN=ECBD_1979 PE=4 SV=1	16.0287	4	418	42.9	4.53	High		1.30422e+07	4	23.6367
A0A140NB55	Molybdopterin biosynthesis MoaE protein OS=Escherichia coli (strain B / BL21-DE3) OX=469008 GN=ECBD_2838 PE=4 SV=1	73.3333	9	150	17	5.4	High		1.30099e+07	9	23.6331
A0A140NDH7	Fructose-1,6-bisphosphatase OS=Escherichia coli (strain B / BL21-DE3) OX=469008 GN=ECBD_4099 PE=3 SV=1	46.438	16	379	40.5	5.78	High		1.29409e+07	16	23.6254
A0A140NA63	Transferase hexapeptide repeat containing protein OS=Escherichia coli (strain B / BL21-DE3) OX=469008 GN=ECBD_3197 PE=4 SV=1	38.2514	4	183	20.1	6.67	High		1.29294e+07	4	23.6242
A0A140N7D8	30S ribosomal protein S16 OS=Escherichia coli (strain B / BL21-DE3) OX=469008 GN=rpsP PE=3 SV=1	65.8537	9	82	9.2	10.55	High		1.28699e+07	9	23.6175
A0A140N7L9	30S ribosomal protein S11 OS=Escherichia coli (strain B / BL21-DE3) OX=469008 GN=rpsK PE=3 SV=1	68.2171	10	129	13.8	11.33	High		1.27411e+07	10	23.603
A0A140N6E6	Flap endonuclease Xni OS=Escherichia coli (strain B / BL21-DE3) OX=469008 GN=xni PE=3 SV=1	24.5552	5	281	31.4	7.08	High		1.26863e+07	5	23.5968
A0A140NBL4	Outer membrane protein assembly factor BamA OS=Escherichia coli (strain B / BL21-DE3) OX=469008 GN=bamA PE=3 SV=1	25.679	16	810	90.5	5.12	High		1.26636e+07	16	23.5942
A0A140NB50	Cell division topological specificity factor OS=Escherichia coli (strain B / BL21-DE3) OX=469008 GN=minE PE=3 SV=1	86.3636	8	88	10.2	5.24	High	Met-loss [N-Term]	1.25566e+07	8	23.5819
A0A140N948	Uncharacterized protein OS=Escherichia coli (strain B / BL21-DE3) OX=469008 GN=ECBD_1833 PE=4 SV=1	86.087	8	115	12.6	5.16	High		1.25223e+07	8	23.578
A0A140N5Y3	Multifunctional CCA protein OS=Escherichia coli (strain B / BL21-DE3) OX=469008 GN=cca PE=3 SV=1	17.233	7	412	46.4	6.65	High		1.23556e+07	7	23.5587
A0A140NF41	ATP synthase gamma chain OS=Escherichia coli (strain B / BL21-DE3) OX=469008 GN=atpG PE=3 SV=1	57.8397	17	287	31.6	8.76	High		1.22311e+07	17	23.544
A0A140N781	Arabinose 5-phosphate isomerase OS=Escherichia coli (strain B / BL21-DE3) OX=469008 GN=ECBD_1017 PE=3 SV=1	59.5016	14	321	34	6.35	High	Met-loss [N-Term]	1.22033e+07	14	23.5408
A0A140N593	Periplasmic binding protein/LacI transcriptional regulator OS=Escherichia coli (strain B / BL21-DE3) OX=469008 GN=ECBD_1136 PE=4 SV=1	68.1957	19	327	35	7.08	High		1.21503e+07	19	23.5345
A0A140NCW0	Putative anti-sigma-28 factor, FlgM OS=Escherichia coli (strain B / BL21-DE3) OX=469008 GN=ECBD_2529 PE=4 SV=1	72.1649	5	97	10.3	5.45	High		1.21502e+07	5	23.5345
A0A140N560	NADH-quinone oxidoreductase subunit B OS=Escherichia coli (strain B / BL21-DE3) OX=469008 GN=nuoB PE=3 SV=1	42.7273	10	220	25	5.74	High		1.21105e+07	10	23.5298
A0A140NFX5	D-aminoacyl-tRNA deacylase OS=Escherichia coli (strain B / BL21-DE3) OX=469008 GN=dtd PE=3 SV=1	28.9655	5	145	15.9	4.88	High		1.2105e+07	5	23.5291
A0A140N8U6	Phospho-2-dehydro-3-deoxyheptonate aldolase OS=Escherichia coli (strain B / BL21-DE3) OX=469008 GN=ECBD_1085 PE=3 SV=1	47.191	10	356	38.8	5.67	High		1.19128e+07	12	23.506
A0A140NC34	Extracellular solute-binding protein family 5 OS=Escherichia coli (strain B / BL21-DE3) OX=469008 GN=ECBD_2793 PE=4 SV=1	35.5469	12	512	56.4	8.28	High		1.18964e+07	12	23.504
A0A140N5E7	Ppx/GppA phosphatase OS=Escherichia coli (strain B / BL21-DE3) OX=469008 GN=ECBD_1186 PE=3 SV=1	41.1306	15	513	58.1	7.14	High		1.1895e+07	15	23.5039
A0A140N9M2	Glutathione S-transferase domain protein OS=Escherichia coli (strain B / BL21-DE3) OX=469008 GN=ECBD_1358 PE=4 SV=1	55.6075	9	214	24.3	5.44	High		1.17844e+07	9	23.4904
A0A140NA52	Uncharacterized protein OS=Escherichia coli (strain B / BL21-DE3) OX=469008 GN=ECBD_2289 PE=4 SV=1	37.2549	8	306	33.6	5.16	High		1.1692e+07	8	23.479
A0A140N811	30S ribosomal protein S15 OS=Escherichia coli (strain B / BL21-DE3) OX=469008 GN=rpsO PE=3 SV=1	60.6742	8	89	10.3	10.4	High		1.16712e+07	9	23.4764
A0A140NBN8	Beta-lactamase OS=Escherichia coli (strain B / BL21-DE3) OX=469008 GN=ECBD_3019 PE=3 SV=1	37.7171	11	403	44.4	8.28	High		1.16712e+07	12	23.4764
A0A140NGW4	tRNA-dihydrouridine(20/20a) synthase OS=Escherichia coli (strain B / BL21-DE3) OX=469008 GN=dusA PE=3 SV=1	54.2029	13	345	38.5	6.58	High		1.16248e+07	13	23.4707
A0A140N4W8	Extracellular solute-binding protein family 1 OS=Escherichia coli (strain B / BL21-DE3) OX=469008 GN=ECBD_0288 PE=4 SV=1	46.1187	17	438	48.4	6.73	High		1.15779e+07	17	23.4649
A0A140NBW7	3-isopropylmalate dehydrogenase OS=Escherichia coli (strain B / BL21-DE3) OX=469008 GN=leuB PE=3 SV=1	15.978	5	363	39.5	5.29	High		1.15146e+07	5	23.457
A0A140NAW7	Carboxyl-terminal protease OS=Escherichia coli (strain B / BL21-DE3) OX=469008 GN=ECBD_1810 PE=3 SV=1	54.6921	28	682	76.5	6.79	High		1.14941e+07	28	23.4544
A0A140N856	Cationic amino acid ABC transporter, periplasmic binding protein OS=Escherichia coli (strain B / BL21-DE3) OX=469008 GN=ECBD_1350 PE=3 SV=1	65.3846	16	260	28.5	5.6	High		11444547	16	23.4482
A0A140N6X3	Aminotransferase class I and II OS=Escherichia coli (strain B / BL21-DE3) OX=469008 GN=ECBD_1293 PE=4 SV=1	32.2816	9	412	46.2	7.87	High		1.14237e+07	9	23.4455
A0A140N7K3	Acetyl-coenzyme A carboxylase carboxyl transferase subunit beta OS=Escherichia coli (strain B / BL21-DE3) OX=469008 GN=accD PE=3 SV=1	54.6053	18	304	33.3	7.68	High		1.13243e+07	18	23.4329
A0A140NEX9	Replicative DNA helicase OS=Escherichia coli (strain B / BL21-DE3) OX=469008 GN=ECBD_3981 PE=3 SV=1	36.9427	12	471	52.4	5.06	High		1.13092e+07	12	23.431
A0A140NAV7	Cupin 4 family protein OS=Escherichia coli (strain B / BL21-DE3) OX=469008 GN=ECBD_2471 PE=4 SV=1	38.874	12	373	42.5	4.83	High	Met-loss [N-Term]	1.12605e+07	12	23.4248
A0A140N599	DNA topoisomerase 4 subunit B OS=Escherichia coli (strain B / BL21-DE3) OX=469008 GN=parE PE=3 SV=1	34.7619	15	630	70.2	5.66	High	Met-loss [N-Term]	1.12444e+07	15	23.4227
A0A140NAC8	Multifunctional fusion protein OS=Escherichia coli (strain B / BL21-DE3) OX=469008 GN=trpF PE=3 SV=1	31.8584	10	452	49.4	5.71	High		1.11919e+07	10	23.416
A0A140NCG3	Uncharacterized protein OS=Escherichia coli (strain B / BL21-DE3) OX=469008 GN=ECBD_4033 PE=4 SV=1	67.8571	10	196	22.6	4.53	High		1.11747e+07	10	23.4137
A0A140NC43	Urea amidolyase related protein OS=Escherichia coli (strain B / BL21-DE3) OX=469008 GN=ECBD_2949 PE=4 SV=1	36.4516	10	310	34.4	8.35	High		1.11408e+07	10	23.4093
A0A140N528	30S ribosomal protein S19 OS=Escherichia coli (strain B / BL21-DE3) OX=469008 GN=rpsS PE=3 SV=1	78.2609	11	92	10.4	10.52	High		1.11398e+07	11	23.4092
A0A140NFC6	UPF0234 protein YajQ OS=Escherichia coli (strain B / BL21-DE3) OX=469008 GN=yajQ PE=3 SV=1	82.8221	16	163	18.3	6.24	High	Met-loss [N-Term]	1.11213e+07	16	23.4068
A0A140N719	Ribosome maturation factor RimM OS=Escherichia coli (strain B / BL21-DE3) OX=469008 GN=rimM PE=3 SV=1	88.4615	14	182	20.6	4.81	High	Met-loss [N-Term]	1.10937e+07	14	23.4032
A0A140N2G7	Glucose-1-phosphate adenylyltransferase OS=Escherichia coli (strain B / BL21-DE3) OX=469008 GN=glgC PE=3 SV=1	49.42	17	431	48.7	6.14	High	Met-loss [N-Term]	1.10638e+07	17	23.3993
A0A140NDV2	Integration host factor subunit beta OS=Escherichia coli (strain B / BL21-DE3) OX=469008 GN=ihfB PE=3 SV=1	68.0851	8	94	10.6	9.35	High		1.1048e+07	8	23.3973
A0A140NDX8	GTPase HflX OS=Escherichia coli (strain B / BL21-DE3) OX=469008 GN=hflX PE=3 SV=1	30.5164	12	426	48.3	5.99	High		1.08962e+07	12	23.3773
A0A140NFX2	Probable phosphoglycerate mutase GpmB OS=Escherichia coli (strain B / BL21-DE3) OX=469008 GN=gpmB PE=3 SV=1	77.6744	18	215	24.1	5.66	High		1.08388e+07	18	23.3697
A0A140NDG6	Uncharacterized protein OS=Escherichia coli (strain B / BL21-DE3) OX=469008 GN=ECBD_3303 PE=4 SV=1	20.6704	3	179	19.9	8.25	High		1.08367e+07	3	23.3694
A0A140SSB3	Bifunctional protein GlmU OS=Escherichia coli (strain B / BL21-DE3) OX=469008 GN=glmU PE=3 SV=1	61.4035	22	456	49.2	6.54	High		1.06373e+07	22	23.3426
A0A140NAY3	Histidine biosynthesis bifunctional protein HisB OS=Escherichia coli (strain B / BL21-DE3) OX=469008 GN=hisB PE=3 SV=1	47.0423	14	355	40.2	6.18	High		10636471	14	23.3425
A0A140N5S7	50S ribosomal protein L3 glutamine methyltransferase OS=Escherichia coli (strain B / BL21-DE3) OX=469008 GN=prmB PE=3 SV=1	35.1613	10	310	35	4.73	High		1.05527e+07	10	23.3311
A0A140NF50	Succinate dehydrogenase iron-sulfur subunit OS=Escherichia coli (strain B / BL21-DE3) OX=469008 GN=ECBD_3876 PE=3 SV=1	15.5738	3	244	27.1	6.52	High		1.05421e+07	3	23.3297
A0A140NFW3	Homoserine kinase OS=Escherichia coli (strain B / BL21-DE3) OX=469008 GN=thrB PE=3 SV=1	28.7097	5	310	33.6	5.66	High		1.05369e+07	5	23.3289
A0A140N258	Sulfatase OS=Escherichia coli (strain B / BL21-DE3) OX=469008 GN=ECBD_0191 PE=4 SV=1	18.4725	9	563	63.8	8.65	High		1.0471e+07	9	23.3199
A0A140N6C1	DNA gyrase subunit B OS=Escherichia coli (strain B / BL21-DE3) OX=469008 GN=gyrB PE=3 SV=1	63.0597	42	804	89.9	6.06	High	Met-loss [N-Term]	1.04349e+07	42	23.3149
A0A140NDH6	UPF0434 protein YcaR OS=Escherichia coli (strain B / BL21-DE3) OX=469008 GN=ycaR PE=3 SV=1	78.3333	6	60	6.9	5.01	High		10413176	6	23.3119
A0A140N8B4	30S ribosomal protein S21 OS=Escherichia coli (strain B / BL21-DE3) OX=469008 GN=rpsU PE=3 SV=1	47.8873	10	71	8.5	11.15	High		1.04131e+07	10	23.3119
A0A140N9N4	5'-deoxynucleotidase YfbR OS=Escherichia coli (strain B / BL21-DE3) OX=469008 GN=yfbR PE=3 SV=1	49.7487	6	199	22.7	5.78	High		1.03512e+07	6	23.3033
A0A140N7F3	Arsenate reductase and related OS=Escherichia coli (strain B / BL21-DE3) OX=469008 GN=ECBD_1219 PE=3 SV=1	56.7797	6	118	13.6	6.55	High	Met-loss [N-Term]	1.03471e+07	6	23.3027
A0A140N4S2	Glycogen debranching enzyme OS=Escherichia coli (strain B / BL21-DE3) OX=469008 GN=glgX PE=3 SV=1	14.7641	7	657	73.5	6.06	High		1.03468e+07	7	23.3027
A0A140N935	Peptidoglycan-binding LysM OS=Escherichia coli (strain B / BL21-DE3) OX=469008 GN=ECBD_1054 PE=4 SV=1	87.2483	11	149	16	6	High	Met-loss [N-Term]	1.02365e+07	11	23.2872
A0A140NDX4	Dihydrolipoyllysine-residue succinyltransferase component of 2-oxoglutarate dehydrogenase complex OS=Escherichia coli (strain B / BL21-DE3) OX=469008 GN=ECBD_2934 PE=3 SV=1	54.0741	29	405	44	5.81	High	Met-loss [N-Term]; Met-loss+Acetyl [N-Term]	1.02265e+07	29	23.2858
A0A140NB11	Uncharacterized protein OS=Escherichia coli (strain B / BL21-DE3) OX=469008 GN=ECBD_1853 PE=4 SV=1	77.3913	11	115	13.3	6.79	High		1.01797e+07	11	23.2792
A0A140N5P1	Transcriptional regulator, LacI family OS=Escherichia coli (strain B / BL21-DE3) OX=469008 GN=ECBD_0667 PE=4 SV=1	39.7554	8	327	36.2	6.02	High		1.0153e+07	9	23.2754
A0A140SSC6	Glycoside hydrolase family 1 OS=Escherichia coli (strain B / BL21-DE3) OX=469008 GN=ECBD_4311 PE=3 SV=1	6.25	1	464	52.5	5.77	High		1.00606e+07	1	23.2622
A0A140N8P8	Fimbrial biogenesis outer membrane usher protein OS=Escherichia coli (strain B / BL21-DE3) OX=469008 GN=ECBD_2655 PE=3 SV=1	0.692841	1	866	95.2	5.67	High		9.93521e+06	1	23.2441
A0A140NB26	Transcriptional regulator, DeoR family OS=Escherichia coli (strain B / BL21-DE3) OX=469008 GN=ECBD_1874 PE=4 SV=1	58.7302	10	252	28.2	6.42	High		9.8553e+06	10	23.2325
A0A140SS61	Regulator of sigma D OS=Escherichia coli (strain B / BL21-DE3) OX=469008 GN=rsd PE=3 SV=1	25.3165	5	158	18.2	6.02	High		9.81424e+06	5	23.2264
A0A140NE66	2-oxoglutarate dehydrogenase, E1 subunit OS=Escherichia coli (strain B / BL21-DE3) OX=469008 GN=ECBD_2935 PE=4 SV=1	60.6645	46	933	105	6.49	High		9.8084e+06	46	23.2256
A0A140N4H3	30S ribosomal protein S12 OS=Escherichia coli (strain B / BL21-DE3) OX=469008 GN=rpsL PE=3 SV=1	69.3548	10	124	13.7	10.87	High	Met-loss [N-Term]	9.79979e+06	10	23.2243
A0A140N7G3	Sulfurtransferase TusD OS=Escherichia coli (strain B / BL21-DE3) OX=469008 GN=tusD PE=3 SV=1	16.4062	1	128	13.6	5.05	High		9.78275e+06	1	23.2218
A0A140NAP3	L-arabinose-binding periplasmic protein OS=Escherichia coli (strain B / BL21-DE3) OX=469008 GN=ECBD_1740 PE=3 SV=1	55.0152	14	329	35.5	6.6	High		9.62947e+06	14	23.199
A0A140N998	Ribonuclease 3 OS=Escherichia coli (strain B / BL21-DE3) OX=469008 GN=rnc PE=3 SV=1	69.0265	15	226	25.5	6.89	High		9.61267e+06	15	23.1965
A0A140NEK7	Inosine kinase OS=Escherichia coli (strain B / BL21-DE3) OX=469008 GN=ECBD_3179 PE=4 SV=1	49.0783	13	434	48.4	5.78	High		9.60546e+06	13	23.1954
A0A140N9R8	Thiol:disulfide interchange protein OS=Escherichia coli (strain B / BL21-DE3) OX=469008 GN=ECBD_3048 PE=3 SV=1	37.5494	7	253	28.1	8.27	High		9.57934e+06	7	23.1915
A0A140N982	Bifunctional protein PutA OS=Escherichia coli (strain B / BL21-DE3) OX=469008 GN=ECBD_2580 PE=3 SV=1	59.697	65	1320	143.7	5.78	High		9.57265e+06	65	23.1905
A0A140NE58	Peptidase T2 asparaginase 2 OS=Escherichia coli (strain B / BL21-DE3) OX=469008 GN=ECBD_2795 PE=4 SV=1	14.0187	2	321	33.4	4.92	High		9.42999e+06	2	23.1688
A0A140NAT6	6-phosphogluconate dehydratase OS=Escherichia coli (strain B / BL21-DE3) OX=469008 GN=ECBD_1788 PE=3 SV=1	34.8259	12	603	64.6	6.38	High		9.26801e+06	12	23.1438
A0A140NA85	dCTP deaminase OS=Escherichia coli (strain B / BL21-DE3) OX=469008 GN=dcd PE=3 SV=1	34.715	7	193	21.2	5.91	High		9.18505e+06	7	23.1309
A0A140NCM7	5'-Nucleotidase domain protein OS=Escherichia coli (strain B / BL21-DE3) OX=469008 GN=ECBD_3176 PE=3 SV=1	53.8182	21	550	60.8	5.71	High		9.14392e+06	21	23.1244
A0A140NAU2	DNA-directed DNA polymerase OS=Escherichia coli (strain B / BL21-DE3) OX=469008 GN=ECBD_1798 PE=4 SV=1	61.8421	4	76	8.8	9.19	High		9107595	4	23.1186
A0A140N6I0	Transcriptional regulator, LacI family OS=Escherichia coli (strain B / BL21-DE3) OX=469008 GN=ECBD_0887 PE=4 SV=1	34.6939	9	343	37.1	6.27	High		9.02732e+06	9	23.1059
A0A140NEE9	Trp operon repressor OS=Escherichia coli (strain B / BL21-DE3) OX=469008 GN=trpR PE=3 SV=1	79.6296	9	108	12.3	5.5	High	Met-loss [N-Term]	8.97531e+06	9	23.0975
A0A140N7W7	Glutathionylspermidine amidase OS=Escherichia coli (strain B / BL21-DE3) OX=469008 GN=ECBD_0750 PE=4 SV=1	60.7431	24	619	70.5	5.26	High	Met-loss [N-Term]	8.89922e+06	24	23.0852
A0A140NAW2	Cold-shock DNA-binding domain protein OS=Escherichia coli (strain B / BL21-DE3) OX=469008 GN=ECBD_1818 PE=4 SV=1	92.7536	8	69	7.4	7.24	High		8.76673e+06	9	23.0636
A0A140NB24	Aldo/keto reductase OS=Escherichia coli (strain B / BL21-DE3) OX=469008 GN=ECBD_3242 PE=4 SV=1	68.5185	17	324	36.4	5.31	High		8.75585e+06	17	23.0618
A0A140SSA2	Glutamine synthetase OS=Escherichia coli (strain B / BL21-DE3) OX=469008 GN=ECBD_4157 PE=3 SV=1	83.7953	32	469	51.9	5.47	High	Met-loss [N-Term]; Met-loss+Acetyl [N-Term]	8.7422e+06	32	23.0596
A0A140NAU5	Formate-dependent phosphoribosylglycinamide formyltransferase OS=Escherichia coli (strain B / BL21-DE3) OX=469008 GN=purT PE=3 SV=1	17.3469	6	392	42.4	5.58	High		8.70441e+06	6	23.0533
A0A140NGH7	Hydrolase OS=Escherichia coli (strain B / BL21-DE3) OX=469008 GN=ECBD_3844 PE=4 SV=1	25.7028	6	249	27.6	5.55	High		8.57737e+06	6	23.0321
A0A140N937	Transcriptional regulator, GntR family OS=Escherichia coli (strain B / BL21-DE3) OX=469008 GN=ECBD_2099 PE=4 SV=1	42.1053	6	228	26.5	6.3	High	Met-loss [N-Term]	8.5738e+06	6	23.0315
A0A140SS82	UDP-N-acetylenolpyruvoylglucosamine reductase OS=Escherichia coli (strain B / BL21-DE3) OX=469008 GN=murB PE=3 SV=1	64.9123	14	342	37.8	6.01	High		8.53179e+06	14	23.0244
A0A140NCU9	SpoVR family protein OS=Escherichia coli (strain B / BL21-DE3) OX=469008 GN=ECBD_2434 PE=4 SV=1	5.88235	2	510	60.8	6	High		8.4076e+06	2	23.0033
A0A140N7J4	Uncharacterized protein OS=Escherichia coli (strain B / BL21-DE3) OX=469008 GN=ECBD_2258 PE=4 SV=1	83.3333	5	90	10.1	4.5	High		8.36861e+06	5	22.9966
A0A140SS76	Bifunctional purine biosynthesis protein PurH OS=Escherichia coli (strain B / BL21-DE3) OX=469008 GN=purH PE=3 SV=1	48.3932	20	529	57.3	5.78	High		8.32294e+06	20	22.9887
A0A140N3L9	50S ribosomal protein L28 OS=Escherichia coli (strain B / BL21-DE3) OX=469008 GN=rpmB PE=3 SV=1	60.2564	7	78	9	11.41	High	Met-loss [N-Term]	8.28865e+06	7	22.9827
A0A140NFG8	3'-5' ssDNA/RNA exonuclease TatD OS=Escherichia coli (strain B / BL21-DE3) OX=469008 GN=tatD PE=3 SV=1	13.0769	3	260	29	5.47	High		8.2201e+06	3	22.9707
A0A140N7M2	Co-chaperone protein HscB OS=Escherichia coli (strain B / BL21-DE3) OX=469008 GN=hscB PE=3 SV=1	83.0409	11	171	20.1	5.19	High	Met-loss [N-Term]	8202575	11	22.9676
A0A140N690	Glycine--tRNA ligase alpha subunit OS=Escherichia coli (strain B / BL21-DE3) OX=469008 GN=glyQ PE=3 SV=1	58.7459	13	303	34.7	5.05	High		8.11587e+06	13	22.9523
A0A140NHF7	LexA repressor OS=Escherichia coli (strain B / BL21-DE3) OX=469008 GN=lexA PE=3 SV=1	69.3069	10	202	22.3	6.71	High		8.11063e+06	10	22.9514
A0A140N9Z7	NADH-quinone oxidoreductase subunit F OS=Escherichia coli (strain B / BL21-DE3) OX=469008 GN=ECBD_1377 PE=3 SV=1	69.4382	30	445	49.3	6.86	High		8.02624e+06	30	22.9363
A0A140NBX8	Cationic amino acid ABC transporter, periplasmic binding protein OS=Escherichia coli (strain B / BL21-DE3) OX=469008 GN=ECBD_2731 PE=3 SV=1	78.1893	18	243	26.9	6.1	High		8.01922e+06	18	22.935
A0A140N9Y8	Glucans biosynthesis protein D OS=Escherichia coli (strain B / BL21-DE3) OX=469008 GN=mdoD PE=3 SV=1	54.1744	22	539	61.3	5.97	High		7.97226e+06	22	22.9266
A0A140NGL5	Type I site-specific deoxyribonuclease OS=Escherichia coli (strain B / BL21-DE3) OX=469008 GN=ECBD_3680 PE=4 SV=1	70.4274	69	1170	134	5.81	High		7.9681e+06	69	22.9258
C6EGE8	50S ribosomal protein L23 OS=Escherichia coli (strain B / BL21-DE3) OX=469008 GN=rplW PE=3 SV=1	35	5	100	11.2	9.94	High		7.94299e+06	5	22.9213
A0A140N7B7	Inosine-5'-monophosphate dehydrogenase OS=Escherichia coli (strain B / BL21-DE3) OX=469008 GN=guaB PE=3 SV=1	73.9754	26	488	52	6.42	High		7.91819e+06	26	22.9167
A0A140N671	Extracellular solute-binding protein family 5 OS=Escherichia coli (strain B / BL21-DE3) OX=469008 GN=ECBD_1480 PE=4 SV=1	14.2384	7	604	69.7	8.7	High		7.87626e+06	7	22.9091
A0A140SSB4	Thioesterase superfamily protein OS=Escherichia coli (strain B / BL21-DE3) OX=469008 GN=ECBD_4218 PE=4 SV=1	14.1935	2	155	17.2	6.95	High	Met-loss [N-Term]	7.74865e+06	2	22.8855
A0A140N827	D-erythrose-4-phosphate dehydrogenase OS=Escherichia coli (strain B / BL21-DE3) OX=469008 GN=epd PE=3 SV=1	58.4071	13	339	37.3	6.76	High		7.54125e+06	13	22.8464
A0A140N8A9	Two component transcriptional regulator, LytTR family OS=Escherichia coli (strain B / BL21-DE3) OX=469008 GN=ECBD_1534 PE=4 SV=1	46.0251	9	239	27.4	6.24	High		7.5349e+06	9	22.8452
A0A140N763	RNA binding S1 domain protein OS=Escherichia coli (strain B / BL21-DE3) OX=469008 GN=ECBD_0338 PE=4 SV=1	52.9107	34	773	85.1	6.3	High		7.43703e+06	34	22.8263
A0A140NF68	Cys-tRNA(Pro)/Cys-tRNA(Cys) deacylase OS=Escherichia coli (strain B / BL21-DE3) OX=469008 GN=ECBD_3175 PE=3 SV=1	83.0189	19	159	17.1	9.04	High		7.43466e+06	19	22.8258
A0A140N5X5	DNA primase OS=Escherichia coli (strain B / BL21-DE3) OX=469008 GN=dnaG PE=3 SV=1	7.57315	4	581	65.5	6	High		7421767	4	22.8233
A0A140N8P1	Universal stress protein OS=Escherichia coli (strain B / BL21-DE3) OX=469008 GN=ECBD_1745 PE=3 SV=1	54.2254	5	142	15.6	5.87	High	Met-loss [N-Term]	7.35962e+06	5	22.8112
A0A140NDY3	Lytic transglycosylase catalytic OS=Escherichia coli (strain B / BL21-DE3) OX=469008 GN=ECBD_3628 PE=4 SV=1	37.3643	20	645	73.3	8.78	High		7.34876e+06	20	22.8091
A0A140NCT8	Dihydroxyacetone kinase, phosphotransfer subunit OS=Escherichia coli (strain B / BL21-DE3) OX=469008 GN=ECBD_2424 PE=3 SV=1	57.6271	20	472	51.4	4.73	High	Met-loss [N-Term]	7.34692e+06	20	22.8087
A0A140N7B3	4-aminobutyrate aminotransferase OS=Escherichia coli (strain B / BL21-DE3) OX=469008 GN=ECBD_1057 PE=3 SV=1	65.493	22	426	45.6	6.4	High		7.32899e+06	22	22.8052
A0A140NCJ1	Extracellular solute-binding protein family 5 OS=Escherichia coli (strain B / BL21-DE3) OX=469008 GN=ECBD_2323 PE=4 SV=1	10.4205	5	547	61.5	7.33	High		7.27614e+06	5	22.7947
A0A140N6R9	Shikimate kinase 1 OS=Escherichia coli (strain B / BL21-DE3) OX=469008 GN=aroK PE=3 SV=1	61.3333	18	225	25.3	5.4	High		7.25699e+06	18	22.7909
A0A140N7T3	Cell division protein ZapE OS=Escherichia coli (strain B / BL21-DE3) OX=469008 GN=zapE PE=3 SV=1	35.4667	10	375	43.1	7.14	High		7.24339e+06	10	22.7882
A0A140N633	Short-chain dehydrogenase/reductase SDR OS=Escherichia coli (strain B / BL21-DE3) OX=469008 GN=ECBD_0735 PE=4 SV=1	45.5782	10	294	31.5	6.8	High	Met-loss [N-Term]	7.16598e+06	10	22.7727
A0A140NHU6	Formate dehydrogenase, beta subunit OS=Escherichia coli (strain B / BL21-DE3) OX=469008 GN=ECBD_4132 PE=4 SV=1	21.6667	5	300	33.1	5.33	High		7.08663e+06	5	22.7567
A0A140ND85	Phosphate-specific transport system accessory protein PhoU OS=Escherichia coli (strain B / BL21-DE3) OX=469008 GN=ECBD_4308 PE=3 SV=1	11.2033	3	241	27.4	5.31	High		7.0191e+06	3	22.7429
A0A140NB83	Nickel-dependent hydrogenase large subunit OS=Escherichia coli (strain B / BL21-DE3) OX=469008 GN=ECBD_2622 PE=3 SV=1	7.53769	4	597	66.2	5.97	High		7.01104e+06	4	22.7412
A0A140NCU5	6,7-dimethyl-8-ribityllumazine synthase OS=Escherichia coli (strain B / BL21-DE3) OX=469008 GN=ribH PE=3 SV=1	66.6667	10	156	16.1	5.25	High		6.99565e+06	10	22.738
A0A140N997	L-asparaginase, type I OS=Escherichia coli (strain B / BL21-DE3) OX=469008 GN=ECBD_1877 PE=4 SV=1	24.2604	6	338	37.1	5.86	High		6.84341e+06	6	22.7063
A0A140N984	Extracellular solute-binding protein family 5 OS=Escherichia coli (strain B / BL21-DE3) OX=469008 GN=ECBD_2152 PE=4 SV=1	18.2171	7	516	57.6	6.74	High		6.76169e+06	7	22.689
A0A140N5F4	Polyribonucleotide nucleotidyltransferase OS=Escherichia coli (strain B / BL21-DE3) OX=469008 GN=pnp PE=3 SV=1	66.526	45	711	77.1	5.21	High	Met-loss [N-Term]	6.73716e+06	45	22.6837
A0A140N7K8	30S ribosomal protein S14 OS=Escherichia coli (strain B / BL21-DE3) OX=469008 GN=rpsN PE=3 SV=1	65.3465	13	101	11.6	11.17	High		6.71901e+06	13	22.6798
A0A140NDA1	Peptidase T OS=Escherichia coli (strain B / BL21-DE3) OX=469008 GN=pepT PE=3 SV=1	54.902	15	408	44.9	5.5	High		6.69407e+06	15	22.6745
A0A140NAA1	Ribonuclease E OS=Escherichia coli (strain B / BL21-DE3) OX=469008 GN=rne PE=3 SV=1	49.6701	36	1061	118.2	5.62	High		6.68122e+06	36	22.6717
A0A140N6Y2	Two component transcriptional regulator, LuxR family OS=Escherichia coli (strain B / BL21-DE3) OX=469008 GN=ECBD_1303 PE=4 SV=1	20.5882	3	204	22.7	7.33	High		6.59154e+06	3	22.6522
A0A140N735	Shikimate dehydrogenase (NADP(+)) OS=Escherichia coli (strain B / BL21-DE3) OX=469008 GN=aroE PE=3 SV=1	47.7941	9	272	29.4	5.58	High		6.59091e+06	9	22.652
A0A140NCQ6	Adenylosuccinate lyase OS=Escherichia coli (strain B / BL21-DE3) OX=469008 GN=ECBD_2468 PE=3 SV=1	57.4561	27	456	51.5	6.01	High	Met-loss [N-Term]	6.55281e+06	27	22.6437
A0A140N3E6	Bifunctional glutamine synthetase adenylyltransferase/adenylyl-removing enzyme OS=Escherichia coli (strain B / BL21-DE3) OX=469008 GN=glnE PE=3 SV=1	36.7865	24	946	108.3	5.2	High		6.55206e+06	24	22.6435
A0A140N613	YicC domain protein OS=Escherichia coli (strain B / BL21-DE3) OX=469008 GN=ECBD_0082 PE=4 SV=1	62.7178	21	287	33.1	5.12	High		6.54781e+06	21	22.6426
A0A140N9J2	Uncharacterized protein OS=Escherichia coli (strain B / BL21-DE3) OX=469008 GN=ECBD_2690 PE=4 SV=1	23.0375	10	586	65.6	4.5	High	Met-loss [N-Term]	6.51171e+06	10	22.6346
A0A140N8R5	Uncharacterized protein OS=Escherichia coli (strain B / BL21-DE3) OX=469008 GN=ECBD_0934 PE=4 SV=1	62.5551	27	454	50.9	6.48	High		6.49905e+06	27	22.6318
A0A140N7B6	GTPase Obg OS=Escherichia coli (strain B / BL21-DE3) OX=469008 GN=obg PE=3 SV=1	31.2821	11	390	43.2	4.88	High		6.49344e+06	11	22.6306
A0A140N699	Dihydroorotate dehydrogenase family protein OS=Escherichia coli (strain B / BL21-DE3) OX=469008 GN=ECBD_1511 PE=4 SV=1	59.854	20	411	45	5.49	High		6.40771e+06	20	22.6114
A0A140NBM9	Arginine N-succinyltransferase OS=Escherichia coli (strain B / BL21-DE3) OX=469008 GN=astA PE=3 SV=1	11.3372	3	344	38.4	6.46	High		6.37421e+06	3	22.6038
A0A140N5G5	Mannitol dehydrogenase domain protein OS=Escherichia coli (strain B / BL21-DE3) OX=469008 GN=ECBD_1485 PE=3 SV=1	13.7295	5	488	54	6.14	High		6.29599e+06	6	22.586
A0A140N689	NAD kinase OS=Escherichia coli (strain B / BL21-DE3) OX=469008 GN=nadK PE=3 SV=1	13.6986	3	292	32.5	6.79	High		6.22423e+06	3	22.5695
A0A140N8F1	DNA gyrase inhibitor OS=Escherichia coli (strain B / BL21-DE3) OX=469008 GN=sbmC PE=3 SV=1	36.3057	4	157	18.1	4.7	High		6.11608e+06	4	22.5442
A0A140NGA3	Uncharacterized protein OS=Escherichia coli (strain B / BL21-DE3) OX=469008 GN=ECBD_4273 PE=4 SV=1	88.3929	15	112	13.1	6.55	High	Met-loss [N-Term]	6.0783e+06	15	22.5352
A0A140NFZ6	Transport-associated OS=Escherichia coli (strain B / BL21-DE3) OX=469008 GN=ECBD_3645 PE=4 SV=1	42.7136	7	199	20.8	6.81	High		6.0129e+06	7	22.5196
A0A140NF36	Uncharacterized protein OS=Escherichia coli (strain B / BL21-DE3) OX=469008 GN=ECBD_3349 PE=4 SV=1	48.4848	9	231	25.2	5.02	High		5.96239e+06	9	22.5075
A0A140N7Q7	Two component transcriptional regulator, winged helix family OS=Escherichia coli (strain B / BL21-DE3) OX=469008 GN=ECBD_2038 PE=4 SV=1	41.4226	10	239	26.7	5.66	High		5.95274e+06	10	22.5051
A0A140NBL1	HAD-superfamily hydrolase, subfamily IIA OS=Escherichia coli (strain B / BL21-DE3) OX=469008 GN=ECBD_2987 PE=4 SV=1	36.4	7	250	27.1	5.41	High		5.88183e+06	7	22.4878
A0A140N307	IS600 orf OS=Escherichia coli (strain B / BL21-DE3) OX=469008 GN=ECBD_0527 PE=4 SV=1	43.5644	4	101	11.5	9.7	High		5.85395e+06	4	22.481
A0A140N6U7	Pseudouridine synthase OS=Escherichia coli (strain B / BL21-DE3) OX=469008 GN=ECBD_1090 PE=3 SV=1	27.9141	8	326	37.1	6.81	High		5.78805e+06	8	22.4646
A0A140N508	Ferroxidase OS=Escherichia coli (strain B / BL21-DE3) OX=469008 GN=ECBD_0415 PE=3 SV=1	89.8734	15	158	18.5	4.81	High		5.69315e+06	15	22.4408
A0A140N9B3	Lactoylglutathione lyase OS=Escherichia coli (strain B / BL21-DE3) OX=469008 GN=ECBD_1992 PE=3 SV=1	48.8889	7	135	14.9	5.02	High		5.64465e+06	7	22.4285
A0A140NAT0	5-hydroxyisourate hydrolase OS=Escherichia coli (strain B / BL21-DE3) OX=469008 GN=ECBD_1677 PE=3 SV=1	24.8175	2	137	15.5	9.11	High		5.59519e+06	2	22.4158
A0A140NAV2	Putative GAF sensor protein OS=Escherichia coli (strain B / BL21-DE3) OX=469008 GN=ECBD_1808 PE=4 SV=1	57.9235	8	183	20.3	4.86	High		5.48704e+06	8	22.3876
A0A140NDD9	TatD-related deoxyribonuclease OS=Escherichia coli (strain B / BL21-DE3) OX=469008 GN=ECBD_3642 PE=4 SV=1	24.3243	4	259	28.9	6.62	High		5.47134e+06	4	22.3835
A0A140NBE0	Uncharacterized protein OS=Escherichia coli (strain B / BL21-DE3) OX=469008 GN=ECBD_1977 PE=4 SV=1	7.1161	2	534	60.7	5.26	High		5428233	2	22.3721
A0A140N9A3	Cyclopropane-fatty-acyl-phospholipid synthase OS=Escherichia coli (strain B / BL21-DE3) OX=469008 GN=ECBD_1982 PE=4 SV=1	35.3403	12	382	43.9	6.05	High	Met-loss+Acetyl [N-Term]	5.29275e+06	12	22.3356
A0A140N545	Altronate dehydratase OS=Escherichia coli (strain B / BL21-DE3) OX=469008 GN=ECBD_0649 PE=4 SV=1	12.9293	5	495	54.1	5.68	High		5.20554e+06	5	22.3116
A0A140NDZ1	Thiamine pyrophosphate protein TPP binding domain protein OS=Escherichia coli (strain B / BL21-DE3) OX=469008 GN=ECBD_2723 PE=3 SV=1	66.6084	27	572	62	6.28	High		5.1921e+06	27	22.3079
A0A140SS80	DNA-directed RNA polymerase subunit beta OS=Escherichia coli (strain B / BL21-DE3) OX=469008 GN=rpoB PE=3 SV=1	80.6259	111	1342	150.5	5.26	High		5.00871e+06	111	22.256
A0A140SSA1	HemY protein OS=Escherichia coli (strain B / BL21-DE3) OX=469008 GN=ECBD_4240 PE=4 SV=1	15.8291	5	398	45.2	8.53	High		4.99395e+06	5	22.2517
A0A140N6Z3	Succinic semialdehyde dehydrogenase OS=Escherichia coli (strain B / BL21-DE3) OX=469008 GN=ECBD_1058 PE=3 SV=1	65.7676	18	482	51.8	5.62	High		4.97686e+06	18	22.2468
A0A140N812	Transcriptional regulator, PadR-like family OS=Escherichia coli (strain B / BL21-DE3) OX=469008 GN=ECBD_0671 PE=4 SV=1	29.9517	5	207	23.4	6.74	High		4.97373e+06	5	22.2459
A0A140NF94	DNA polymerase III subunit epsilon OS=Escherichia coli (strain B / BL21-DE3) OX=469008 GN=dnaQ PE=4 SV=1	18.2927	4	246	27.4	5.82	High		4.94383e+06	4	22.2372
A0A140NCS9	Ribose-phosphate pyrophosphokinase OS=Escherichia coli (strain B / BL21-DE3) OX=469008 GN=prs PE=3 SV=1	52.819	16	337	36.6	5.74	High		4.93668e+06	16	22.2351
A0A140N7P8	Beta-glucuronidase OS=Escherichia coli (strain B / BL21-DE3) OX=469008 GN=ECBD_2028 PE=3 SV=1	56.5506	22	603	68.4	5.5	High		4.887e+06	22	22.2205
A0A140N4M1	tRNA (guanosine(18)-2'-O)-methyltransferase OS=Escherichia coli (strain B / BL21-DE3) OX=469008 GN=trmH PE=3 SV=1	29.6943	5	229	25.3	7.23	High		4.87555e+06	5	22.2171
A0A140N6E2	Glucan 1,3-alpha-glucosidase OS=Escherichia coli (strain B / BL21-DE3) OX=469008 GN=ECBD_0061 PE=3 SV=1	29.5082	15	793	92	5.76	High		4.81046e+06	15	22.1977
A0A140NCP5	UPF0263 protein YciU OS=Escherichia coli (strain B / BL21-DE3) OX=469008 GN=yciU PE=3 SV=1	14.6789	3	109	12.7	4.12	High		4.77619e+06	3	22.1874
A0A140ND10	Peptidyl-prolyl cis-trans isomerase OS=Escherichia coli (strain B / BL21-DE3) OX=469008 GN=ECBD_3133 PE=3 SV=1	64.6341	11	164	18.1	5.8	High	Met-loss [N-Term]	4.6625e+06	12	22.1527
A0A140NCE1	30S ribosomal subunit S22 OS=Escherichia coli (strain B / BL21-DE3) OX=469008 GN=ECBD_2159 PE=4 SV=1	60	5	45	5.1	11.05	High		4.65319e+06	5	22.1498
A0A140N8P7	Hydroxyethylthiazole kinase OS=Escherichia coli (strain B / BL21-DE3) OX=469008 GN=thiM PE=3 SV=1	23.2824	4	262	27.3	5.99	High		4.60435e+06	4	22.1346
A0A140N3I5	2,5-didehydrogluconate reductase OS=Escherichia coli (strain B / BL21-DE3) OX=469008 GN=ECBD_0728 PE=4 SV=1	72	19	275	31.1	6.46	High		4.557e+06	19	22.1197
A0A140N6P6	D-isomer specific 2-hydroxyacid dehydrogenase NAD-binding OS=Escherichia coli (strain B / BL21-DE3) OX=469008 GN=ECBD_0825 PE=3 SV=1	38.5366	13	410	44.1	6.35	High		4.542e+06	13	22.1149
A0A140NIC8	tRNA modification GTPase MnmE OS=Escherichia coli (strain B / BL21-DE3) OX=469008 GN=mnmE PE=3 SV=1	45.1542	17	454	49.2	5.02	High	Met-loss [N-Term]	4.54154e+06	17	22.1148
A0A140NEW9	Anaerobic ribonucleoside-triphosphate reductase OS=Escherichia coli (strain B / BL21-DE3) OX=469008 GN=ECBD_3796 PE=4 SV=1	37.7809	23	712	80	6.83	High		4.53612e+06	23	22.113
A0A140NG13	4-hydroxyphenylacetate degradation bifunctional isomerase/decarboxylase, HpaG1 subunit OS=Escherichia coli (strain B / BL21-DE3) OX=469008 GN=ECBD_3666 PE=4 SV=1	30.5361	8	429	47.1	5.15	High		4.45448e+06	8	22.0868
A0A140N942	GTPase Der OS=Escherichia coli (strain B / BL21-DE3) OX=469008 GN=der PE=3 SV=1	42.8571	20	490	55	5.85	High		4.31792e+06	20	22.0419
A0A140N6N0	Phenylalanine--tRNA ligase alpha subunit OS=Escherichia coli (strain B / BL21-DE3) OX=469008 GN=pheS PE=3 SV=1	89.6024	26	327	36.8	6.2	High	Met-loss [N-Term]	4.18398e+06	26	21.9964
A0A140NC83	Transcriptional regulator, TyrR OS=Escherichia coli (strain B / BL21-DE3) OX=469008 GN=ECBD_2294 PE=4 SV=1	36.2573	14	513	57.6	5.78	High		4.17793e+06	14	21.9944
A0A140NAP6	Two component transcriptional regulator, LuxR family OS=Escherichia coli (strain B / BL21-DE3) OX=469008 GN=ECBD_2398 PE=4 SV=1	57.8704	15	216	23.9	6.07	High	Met-loss [N-Term]	4176744	15	21.9939
A0A140N7I9	Phosphoribosylformylglycinamidine synthase OS=Escherichia coli (strain B / BL21-DE3) OX=469008 GN=purL PE=3 SV=1	47.3359	39	1295	141.3	5.41	High	Met-loss [N-Term]	4.1606e+06	39	21.9884
A0A140N8U2	Oligopeptidase B OS=Escherichia coli (strain B / BL21-DE3) OX=469008 GN=ECBD_1795 PE=4 SV=1	7.14286	4	686	79.4	5.9	High		4.14695e+06	4	21.9836
A0A140N7D0	DNA ligase OS=Escherichia coli (strain B / BL21-DE3) OX=469008 GN=ligA PE=3 SV=1	50.8197	25	671	73.5	5.49	High		4.03876e+06	25	21.9455
A0A140NAH0	Fructose-bisphosphate aldolase OS=Escherichia coli (strain B / BL21-DE3) OX=469008 GN=ECBD_1560 PE=4 SV=1	75.7143	21	350	38.1	6.73	High	Met-loss [N-Term]	3.98265e+06	21	21.9253
A0A140NGZ8	NmrA family protein OS=Escherichia coli (strain B / BL21-DE3) OX=469008 GN=ECBD_3818 PE=4 SV=1	75.5245	15	286	29.9	6.43	High		3.97704e+06	15	21.9233
A0A140N706	ATP-dependent dethiobiotin synthetase BioD OS=Escherichia coli (strain B / BL21-DE3) OX=469008 GN=bioD PE=3 SV=1	9.95671	2	231	25	6.55	High		3.96668e+06	2	21.9195
A0A140N9B6	Succinylornithine transaminase OS=Escherichia coli (strain B / BL21-DE3) OX=469008 GN=astC PE=3 SV=1	22.6601	4	406	43.6	6.35	High		3.92758e+06	5	21.9052
A0A140NC58	Mandelate racemase/muconate lactonizing protein OS=Escherichia coli (strain B / BL21-DE3) OX=469008 GN=ECBD_2292 PE=3 SV=1	38.3178	9	321	34.7	5.06	High		3.87445e+06	9	21.8856
A0A140NBB4	NAD(P)H dehydrogenase (Quinone) OS=Escherichia coli (strain B / BL21-DE3) OX=469008 GN=ECBD_2694 PE=4 SV=1	29.5918	6	196	23	5.41	High		3.86331e+06	6	21.8814
A0A140NBG5	ATP-dependent Clp protease, ATP-binding subunit clpA OS=Escherichia coli (strain B / BL21-DE3) OX=469008 GN=ECBD_2712 PE=3 SV=1	39.314	20	758	84.2	6.32	High		3.84887e+06	20	21.876
A0A140NE32	Restriction endonuclease OS=Escherichia coli (strain B / BL21-DE3) OX=469008 GN=ECBD_3679 PE=4 SV=1	67.4342	16	304	33.5	5.87	High	Met-loss [N-Term]	3.82784e+06	16	21.8681
A0A140N6V7	Uracil-DNA glycosylase OS=Escherichia coli (strain B / BL21-DE3) OX=469008 GN=ung PE=3 SV=1	46.2882	9	229	25.7	7.05	High	Met-loss [N-Term]	3.78615e+06	9	21.8523
A0A140N4A2	PTS system, glucitol/sorbitol-specific IIA subunit OS=Escherichia coli (strain B / BL21-DE3) OX=469008 GN=ECBD_1021 PE=4 SV=1	100	9	123	13.3	5.05	High	Met-loss [N-Term]	3.75184e+06	9	21.8392
A0A140NA72	Peptidase U32 OS=Escherichia coli (strain B / BL21-DE3) OX=469008 GN=ECBD_1572 PE=4 SV=1	41.5011	12	453	51.1	6.19	High		3.72451e+06	12	21.8286
A0A140NDY4	Guanosine-5'-triphosphate,3'-diphosphate pyrophosphatase OS=Escherichia coli (strain B / BL21-DE3) OX=469008 GN=gppA PE=3 SV=1	24.2915	9	494	54.9	6.48	High		3.69105e+06	9	21.8156
A0A140NDQ3	3-isopropylmalate dehydratase small subunit OS=Escherichia coli (strain B / BL21-DE3) OX=469008 GN=leuD PE=3 SV=1	45.7711	6	201	22.5	5.39	High		3.67417e+06	6	21.809
A0A140NBZ9	Altronate oxidoreductase OS=Escherichia coli (strain B / BL21-DE3) OX=469008 GN=uxaB PE=3 SV=1	7.66046	3	483	54.8	5.12	High		3.65574e+06	3	21.8017
C5W865	Sulfite reductase [NADPH] hemoprotein beta-component OS=Escherichia coli (strain B / BL21-DE3) OX=469008 GN=cysI PE=3 SV=1	10.8772	5	570	63.9	7.62	High		3.5812e+06	5	21.772
A0A140N9Y0	GTP 3',8-cyclase OS=Escherichia coli (strain B / BL21-DE3) OX=469008 GN=moaA PE=3 SV=1	1.82371	1	329	37.3	7.77	High		3.47114e+06	1	21.727
A0A140N564	Signal recognition particle receptor FtsY OS=Escherichia coli (strain B / BL21-DE3) OX=469008 GN=ftsY PE=3 SV=1	53.1187	20	497	54.5	4.5	High		3.44985e+06	20	21.7181
A0A140N8B5	CinA-like protein OS=Escherichia coli (strain B / BL21-DE3) OX=469008 GN=ECBD_1410 PE=3 SV=1	49.5	14	400	44.2	5.68	High		3.38058e+06	14	21.6888
A0A140N4M6	DNA-3-methyladenine glycosylase I OS=Escherichia coli (strain B / BL21-DE3) OX=469008 GN=ECBD_0188 PE=4 SV=1	15.508	3	187	21.1	6.65	High		3.36345e+06	3	21.6815
A0A140N2N4	ABC transporter related OS=Escherichia coli (strain B / BL21-DE3) OX=469008 GN=ECBD_0396 PE=4 SV=1	23.5479	13	637	71.8	5.73	High		3.33387e+06	13	21.6688
A0A140N7B8	WGR domain protein OS=Escherichia coli (strain B / BL21-DE3) OX=469008 GN=ECBD_1261 PE=4 SV=1	11.4754	2	244	28.1	5.14	High		3.31292e+06	2	21.6597
A0A140NAC4	PhoH family protein OS=Escherichia coli (strain B / BL21-DE3) OX=469008 GN=ECBD_2991 PE=4 SV=1	62.117	22	359	40.6	6.67	High		3.26312e+06	22	21.6378
A0A140N7F1	Two component transcriptional regulator, LytTR family OS=Escherichia coli (strain B / BL21-DE3) OX=469008 GN=ECBD_1291 PE=4 SV=1	36.8852	7	244	28.7	5.8	High		3.24306e+06	7	21.6289
A0A140N885	NADH-quinone oxidoreductase subunit I OS=Escherichia coli (strain B / BL21-DE3) OX=469008 GN=nuoI PE=3 SV=1	40	6	180	20.5	5.48	High		3.20251e+06	6	21.6108
A0A140N4C9	Ribosomal RNA small subunit methyltransferase E OS=Escherichia coli (strain B / BL21-DE3) OX=469008 GN=ECBD_0794 PE=3 SV=1	44.4444	6	243	27	6.64	High		3.17531e+06	6	21.5985
A0A140N8G7	Dyp-type peroxidase family OS=Escherichia coli (strain B / BL21-DE3) OX=469008 GN=ECBD_2575 PE=4 SV=1	10.1655	4	423	46.7	6.92	High		3.15878e+06	4	21.5909
A0A140NHR4	Uncharacterized protein OS=Escherichia coli (strain B / BL21-DE3) OX=469008 GN=ECBD_4102 PE=4 SV=1	52.5253	5	99	10.7	4.68	High		3.15843e+06	5	21.5908
A0A140ND42	NAD/NADP-dependent betaine aldehyde dehydrogenase OS=Escherichia coli (strain B / BL21-DE3) OX=469008 GN=betB PE=3 SV=1	51.6327	19	490	52.9	5.26	High		3.14971e+06	19	21.5868
A0A140NC35	Bifunctional aspartokinase/homoserine dehydrogenase OS=Escherichia coli (strain B / BL21-DE3) OX=469008 GN=ECBD_3616 PE=3 SV=1	52.3171	30	820	89	5.74	High		3.09507e+06	31	21.5615
A0A140NBX4	Ribonuclease T OS=Escherichia coli (strain B / BL21-DE3) OX=469008 GN=rnt PE=3 SV=1	57.6744	7	215	23.5	5.39	High	Met-loss [N-Term]	3.05091e+06	7	21.5408
A0A140NCS4	Sulfofructose kinase OS=Escherichia coli (strain B / BL21-DE3) OX=469008 GN=ECBD_4144 PE=3 SV=1	3.3557	1	298	31.7	5.1	High		3.04471e+06	1	21.5379
A0A140N6L7	Uncharacterized protein OS=Escherichia coli (strain B / BL21-DE3) OX=469008 GN=ECBD_0304 PE=4 SV=1	12.2449	1	49	5.5	8.98	High	Met-loss [N-Term]	3.0348e+06	1	21.5332
A0A140NFB9	Formate dehydrogenase, alpha subunit OS=Escherichia coli (strain B / BL21-DE3) OX=469008 GN=ECBD_4131 PE=3 SV=1	49.8031	30	1016	112.5	7.28	High		2.92319e+06	34	21.4791
A0A140NCS5	Flagellar hook-associated protein 3 OS=Escherichia coli (strain B / BL21-DE3) OX=469008 GN=ECBD_2517 PE=4 SV=1	5.99369	1	317	34.2	4.69	High		2.91419e+06	1	21.4747
A0A140NG37	Isochorismatase hydrolase OS=Escherichia coli (strain B / BL21-DE3) OX=469008 GN=ECBD_4201 PE=4 SV=1	15.7658	3	222	24	5.27	High	Met-loss [N-Term]	2.88784e+06	3	21.4616
A0A140N6T6	Siroheme synthase OS=Escherichia coli (strain B / BL21-DE3) OX=469008 GN=cysG PE=3 SV=1	29.7593	10	457	49.9	6.21	High		2.8177e+06	10	21.4261
A0A140NF78	Cell division protein FtsN OS=Escherichia coli (strain B / BL21-DE3) OX=469008 GN=ftsN PE=3 SV=1	20.6897	6	319	35.8	10.17	High		2.81381e+06	6	21.4241
A0A140NDU2	Peptidyl-prolyl cis-trans isomerase OS=Escherichia coli (strain B / BL21-DE3) OX=469008 GN=ECBD_3588 PE=3 SV=1	75.8389	7	149	16.1	4.44	High	Met-loss [N-Term]	2.80588e+06	7	21.42
A0A140NCE0	RND efflux system, outer membrane lipoprotein, NodT family OS=Escherichia coli (strain B / BL21-DE3) OX=469008 GN=ECBD_3090 PE=3 SV=1	28.6652	9	457	50.3	6.4	High		2.79538e+06	9	21.4146
A0A140N8R1	Two component transcriptional regulator, winged helix family OS=Escherichia coli (strain B / BL21-DE3) OX=469008 GN=ECBD_1574 PE=4 SV=1	60.8333	14	240	27.6	5.76	High	Met-loss [N-Term]; Met-loss+Acetyl [N-Term]	2.74272e+06	14	21.3872
A0A140NBF7	Catalase OS=Escherichia coli (strain B / BL21-DE3) OX=469008 GN=ECBD_1913 PE=3 SV=1	46.0823	35	753	84.1	5.82	High		2.73536e+06	35	21.3833
A0A140NEC1	DNA-directed DNA polymerase OS=Escherichia coli (strain B / BL21-DE3) OX=469008 GN=ECBD_3777 PE=4 SV=1	27.2109	4	147	16.6	5.64	High		2.59809e+06	4	21.309
A0A140N5T5	Periplasmic serine endoprotease DegP-like OS=Escherichia coli (strain B / BL21-DE3) OX=469008 GN=ECBD_0513 PE=3 SV=1	50.5495	19	455	47.2	5.95	High		2.5543e+06	19	21.2845
A0A140N7A3	ABC transporter related OS=Escherichia coli (strain B / BL21-DE3) OX=469008 GN=ECBD_0541 PE=4 SV=1	51.0373	9	241	26.8	5.99	High		2.54498e+06	10	21.2792
A0A140N5N4	PfkB domain protein OS=Escherichia coli (strain B / BL21-DE3) OX=469008 GN=ECBD_1557 PE=3 SV=1	8.72274	3	321	34.3	4.89	High		2.52343e+06	3	21.267
A0A140N443	UPF0441 protein YgiB OS=Escherichia coli (strain B / BL21-DE3) OX=469008 GN=ygiB PE=3 SV=1	16.5919	3	223	23.5	9.35	High		2.45587e+06	3	21.2278
A0A140N7N3	Glutamate synthase (Ferredoxin) OS=Escherichia coli (strain B / BL21-DE3) OX=469008 GN=ECBD_0530 PE=4 SV=1	61.6348	74	1517	166.6	6.71	High		2.41598e+06	74	21.2042
A0A140N8C7	Mannose-1-phosphate guanylyltransferase/mannose-6-phosphate isomerase OS=Escherichia coli (strain B / BL21-DE3) OX=469008 GN=ECBD_1628 PE=3 SV=1	7.59494	3	474	53.8	6.32	High		2.38083e+06	3	21.183
A0A140NCA6	tRNA sulfurtransferase OS=Escherichia coli (strain B / BL21-DE3) OX=469008 GN=thiI PE=3 SV=1	74.0664	28	482	55	6.61	High		2.37584e+06	28	21.18
A0A140N7Y9	L-asparaginase, type II OS=Escherichia coli (strain B / BL21-DE3) OX=469008 GN=ECBD_0783 PE=3 SV=1	22.4138	6	348	36.8	6.38	High		2.33331e+06	6	21.1539
A0A140N9Z2	tRNA-dihydrouridine(16) synthase OS=Escherichia coli (strain B / BL21-DE3) OX=469008 GN=dusC PE=3 SV=1	3.1746	1	315	35.2	6.55	High		2.27084e+06	1	21.1148
A0A140NET7	Sec-independent protein translocase protein TatB OS=Escherichia coli (strain B / BL21-DE3) OX=469008 GN=tatB PE=3 SV=1	36.8421	3	171	18.4	5.22	High		2.19362e+06	3	21.0649
A0A140N8F2	7-carboxy-7-deazaguanine synthase OS=Escherichia coli (strain B / BL21-DE3) OX=469008 GN=queE PE=3 SV=1	67.713	11	223	25	6.06	High		2.16598e+06	11	21.0466
A0A140NCE2	Pyrroline-5-carboxylate reductase OS=Escherichia coli (strain B / BL21-DE3) OX=469008 GN=proC PE=3 SV=1	35.6877	8	269	28.1	5.9	High		2.08648e+06	8	20.9926
A0A140N6T4	2-hydroxy-3-oxopropionate reductase OS=Escherichia coli (strain B / BL21-DE3) OX=469008 GN=ECBD_0988 PE=4 SV=1	5.62914	1	302	30.7	5.27	High		2.05011e+06	1	20.9673
A0A140N8I1	Ketose-bisphosphate aldolase OS=Escherichia coli (strain B / BL21-DE3) OX=469008 GN=ECBD_1871 PE=3 SV=1	2.15827	1	278	30.8	5.29	High	Met-loss [N-Term]	2.0227e+06	1	20.9478
A0A140N598	50S ribosomal protein L13 OS=Escherichia coli (strain B / BL21-DE3) OX=469008 GN=rplM PE=3 SV=1	92.9577	20	142	16	9.91	High		1.96974e+06	20	20.9096
A0A140ND83	Pyridine nucleotide-disulphide oxidoreductase dimerisation region OS=Escherichia coli (strain B / BL21-DE3) OX=469008 GN=ECBD_3354 PE=3 SV=1	2.04082	1	441	48.2	6.54	High		1.9613e+06	1	20.9034
A0A140NEN8	Negative modulator of initiation of replication OS=Escherichia coli (strain B / BL21-DE3) OX=469008 GN=seqA PE=3 SV=1	54.6961	10	181	20.3	8.7	High		1.95624e+06	10	20.8997
A0A140N5V0	Glucarate dehydratase OS=Escherichia coli (strain B / BL21-DE3) OX=469008 GN=ECBD_0942 PE=3 SV=1	56.7265	17	446	49.1	6.18	High	Met-loss [N-Term]	1.93882e+06	18	20.8867
A0A140N561	Phosphoribulokinase OS=Escherichia coli (strain B / BL21-DE3) OX=469008 GN=ECBD_0393 PE=3 SV=1	46.3668	9	289	32.3	6.67	High		1.92438e+06	9	20.876
A0A140N6G4	Diaminopropionate ammonia-lyase OS=Escherichia coli (strain B / BL21-DE3) OX=469008 GN=ECBD_0866 PE=4 SV=1	3.26633	1	398	43.3	5.88	High		1.91401e+06	1	20.8682
A0A140NAS5	Transcriptional regulator, AsnC family OS=Escherichia coli (strain B / BL21-DE3) OX=469008 GN=ECBD_2706 PE=4 SV=1	53.6585	14	164	18.9	8.78	High		1.79635e+06	14	20.7766
A0A140N6M9	Alpha-1,4 glucan phosphorylase OS=Escherichia coli (strain B / BL21-DE3) OX=469008 GN=ECBD_0314 PE=3 SV=1	42.3313	25	815	93.1	5.9	High	Met-loss [N-Term]	1.72017e+06	25	20.7141
A0A140NC89	5-carboxymethyl-2-hydroxymuconate semialdehyde dehydrogenase OS=Escherichia coli (strain B / BL21-DE3) OX=469008 GN=ECBD_3667 PE=3 SV=1	42.8279	12	488	53	6.39	High		1634541	12	20.6405
A0A140NDE3	OmpA domain protein transmembrane region-containing protein OS=Escherichia coli (strain B / BL21-DE3) OX=469008 GN=ECBD_2638 PE=3 SV=1	54.0462	14	346	37.2	6.42	High		1.61454e+06	14	20.6227
A0A140N866	NUDIX hydrolase OS=Escherichia coli (strain B / BL21-DE3) OX=469008 GN=ECBD_1360 PE=4 SV=1	86.6667	14	180	20.4	4.72	High		1.49856e+06	14	20.5151
A0A140NBN2	CI repressor OS=Escherichia coli (strain B / BL21-DE3) OX=469008 GN=ECBD_2773 PE=4 SV=1	56.6138	9	189	21.2	5.3	High		1.46196e+06	9	20.4795
A0A140N6R1	DNA-binding protein OS=Escherichia coli (strain B / BL21-DE3) OX=469008 GN=ECBD_1050 PE=3 SV=1	57.4627	7	134	15.3	8.4	High	Met-loss [N-Term]	1.43556e+06	7	20.4532
A0A140NAT9	Flagellar hook protein FlgE OS=Escherichia coli (strain B / BL21-DE3) OX=469008 GN=ECBD_2524 PE=3 SV=1	4.48878	1	401	42	4.68	High		1.39506e+06	1	20.4119
A0A140N5L3	ATP-dependent zinc metalloprotease FtsH OS=Escherichia coli (strain B / BL21-DE3) OX=469008 GN=ftsH PE=3 SV=1	36.3215	21	647	71	6.11	High		1.37211e+06	21	20.388
A0A140N8J5	Hydrogenase expression/formation protein HypE OS=Escherichia coli (strain B / BL21-DE3) OX=469008 GN=ECBD_0995 PE=4 SV=1	19.3452	5	336	35.1	5.17	High		1.35748e+06	5	20.3725
A0A140NAV5	Protein YceI OS=Escherichia coli (strain B / BL21-DE3) OX=469008 GN=yceI PE=3 SV=1	65.9686	11	191	20.9	5.91	High		1.34904e+06	11	20.3635
A0A140NEC6	Aspartate carbamoyltransferase regulatory chain OS=Escherichia coli (strain B / BL21-DE3) OX=469008 GN=pyrI PE=3 SV=1	78.4314	9	153	17.1	7.37	High		1.34831e+06	9	20.3627
A0A140NH84	Fumarate hydratase class I OS=Escherichia coli (strain B / BL21-DE3) OX=469008 GN=ECBD_3909 PE=3 SV=1	49.0876	6	548	60.1	6.2	High		1.30142e+06	23	20.3117
A0A140N8E8	(P)ppGpp synthetase I, SpoT/RelA OS=Escherichia coli (strain B / BL21-DE3) OX=469008 GN=ECBD_0945 PE=3 SV=1	20.6989	13	744	83.8	6.77	High		1.29725e+06	13	20.307
A0A140N731	Cytoskeleton protein RodZ OS=Escherichia coli (strain B / BL21-DE3) OX=469008 GN=rodZ PE=3 SV=1	32.0475	8	337	36.2	5.74	High	Met-loss [N-Term]	1.28322e+06	8	20.2913
A0A140NCH5	Efflux transporter, RND family, MFP subunit OS=Escherichia coli (strain B / BL21-DE3) OX=469008 GN=ECBD_3088 PE=3 SV=1	8.84521	3	407	44.3	6.21	High		1.09529e+06	3	20.0629
A0A140SSB1	Ribosomal RNA small subunit methyltransferase G OS=Escherichia coli (strain B / BL21-DE3) OX=469008 GN=rsmG PE=3 SV=1	81.1594	12	207	23.4	6.54	High		1.01754e+06	12	19.9567
A0A140N6N6	Pseudouridine synthase OS=Escherichia coli (strain B / BL21-DE3) OX=469008 GN=ECBD_0938 PE=4 SV=1	9.61538	2	260	29.6	7.09	High		988118	2	19.9143
A0A140N9F8	UPF0061 protein YdiU OS=Escherichia coli (strain B / BL21-DE3) OX=469008 GN=ydiU PE=3 SV=1	11.2971	4	478	54.4	6.16	High		968969	4	19.8861
A0A140NBC5	Glutamate dehydrogenase OS=Escherichia coli (strain B / BL21-DE3) OX=469008 GN=ECBD_1883 PE=3 SV=1	59.5078	20	447	48.6	6.4	High		965826	20	19.8814
A0A140N4H5	Autonomous glycyl radical cofactor OS=Escherichia coli (strain B / BL21-DE3) OX=469008 GN=grcA PE=3 SV=1	87.4016	13	127	14.3	5.17	High		832567	15	19.6672
A0A140NDI1	Glutamyl-Q tRNA(Asp) synthetase OS=Escherichia coli (strain B / BL21-DE3) OX=469008 GN=gluQ PE=3 SV=1	19.8052	4	308	34.9	6.96	High		645184	4	19.2994
A0A140N683	RNA polymerase sigma factor RpoD OS=Escherichia coli (strain B / BL21-DE3) OX=469008 GN=rpoD PE=3 SV=1	45.8401	32	613	70.2	4.81	High	Met-loss [N-Term]	625679	33	19.2551
A0A140N7V5	Transcriptional regulator, LysR family OS=Escherichia coli (strain B / BL21-DE3) OX=469008 GN=ECBD_1371 PE=4 SV=1	26.2821	7	312	34.6	5.39	High		594025	7	19.1802
A0A140N958	Uncharacterized protein OS=Escherichia coli (strain B / BL21-DE3) OX=469008 GN=ECBD_1214 PE=4 SV=1	35.5401	7	287	31.4	5.9	High		556388	7	19.0857
A0A140N8Y1	Nicotinate-nucleotide--dimethylbenzimidazole phosphoribosyltransferase OS=Escherichia coli (strain B / BL21-DE3) OX=469008 GN=cobT PE=3 SV=1	22.5627	5	359	37	5.34	High		398644	5	18.6047
